# Supplementary material
Source: HighWire-hosted journal article supplement (https://bibliotheek.ehb.be/content/76/1/38)
Supplement: inline-supplementary-material-1 [file inline-supplementary-material-1.pdf]

## Economic Inequality and Depressive Symptoms: An Individual versus Aggregate level analysis using Mexican survey data

### Supplementary Electronic Material

#### Appendix A: DEPRESSIVE SYMPTOMS INSTRUMENT

Information regarding depressive symptoms was collected as part of the survey using the reduced version of the widely used Centre for Epidemiologic Studies Depression Scale (CES-D), validated for Mexico, and whose questions read as follow:

Figure A1. Depressive symptoms questions as they appeared in the questionnaire

II. DEPRESIÓN

A continuación le mencionaré sentimientos o conductas que usted haya podido experimentar. Por favor, dígame con qué frecuencia se ha sentido así durante la ÚLTIMA SEMANA.

| 2.01                                                                             |                                       |                                          |                                                 |                                                           |
|----------------------------------------------------------------------------------|---------------------------------------|------------------------------------------|-------------------------------------------------|-----------------------------------------------------------|
| Durante la última semana...                                                      |                                       |                                          |                                                 |                                                           |
| ENTREVISTADOR: LEA LAS OPCIONES DE RESPUESTA PARA CADA PREGUNTA Y ANOTE SÓLO UNA |                                       |                                          |                                                 |                                                           |
|                                                                                  | Rara vez o nunca<br>(menos de un día) | Pocas veces o alguna<br>vez (1 - 2 días) | Un número de veces<br>considerable (3 - 4 días) | Todo el tiempo<br>o la mayoría del<br>tiempo (5 - 7 días) |
| a) ¿se sentía como si no pudiera quitarse de encima la tristeza?                 | a201_a                                | 2                                        | 3                                               | 4                                                         |
| b) ¿le costaba concentrarse en lo que estaba haciendo?                           | a201_b                                | 2                                        | 3                                               | 4                                                         |
| c) ¿se sintió deprimido/a?                                                       | a201_c                                | 2                                        | 3                                               | 4                                                         |
| d) ¿le parecía que todo lo que hacía era un esfuerzo?                            | a201_d                                | 2                                        | 3                                               | 4                                                         |
| e) ¿no durmió bien?                                                              | a201_e                                | 2                                        | 3                                               | 4                                                         |
| f) ¿disfrutó de la vida?                                                         | a201_f                                | 2                                        | 3                                               | 4                                                         |
| g) ¿se sintió triste?                                                            | a201_g                                | 2                                        | 3                                               | 4                                                         |

CUALQUIER  
OPCIÓN  
PASE A 2.02

Our translation of the above Spanish text:

“I will read feelings or conducts that you might have experimented. Please, tell me the frequency to which you have felt this in the LAST WEEK:

- You felt overwhelmed by sadness
- It was hard for you to concentrate in what I was doing
- You felt depressed
- It felt like everything you did was a major effort
- You did not sleep well
- You felt you enjoyed life
- You felt sad”

### **Appendix B: DERIVATION OF OUR ASSET INDEX THROUGH PRINCIPAL COMPONENT ANALYSIS**

We model absolute wealth as quartiles of an asset index built through PCA using the rich information on assets possession and quality contained in the survey. Since customary PCA in the presence of numerous binary and cardinal variables (as in our data) may produce incorrect results (Kolenikov and Angeles 2009; Howe et al. 2012), we adopt the methodology proposed by Kolenikov and Angeles (2009) and run PCA using polychoric correlations. The tables below provide information regarding the construction of the asset index.

#### **Indicators Used to Construct Asset Index and Weights Produced by PCA**

| Indicator       | Description            | Measurement Type | Categories        | Weight Produced by PCA |             |           |           |
|-----------------|------------------------|------------------|-------------------|------------------------|-------------|-----------|-----------|
| wall            | Main Material of walls | Categorical      | Waste / Rubbish   | -0.519897              |             |           |           |
|                 |                        |                  | Cardboard         | -0.447112              |             |           |           |
|                 |                        |                  | Asbestos          | -0.392333              |             |           |           |
|                 |                        |                  | Bamboo/Palm       | -0.354359              |             |           |           |
|                 |                        |                  | Mud               | -0.335058              |             |           |           |
|                 |                        |                  | Wood              | -0.271810              |             |           |           |
|                 |                        |                  | Adobe             | -0.196361              |             |           |           |
|                 |                        |                  | Stone/brick       | 0.043297               |             |           |           |
|                 |                        |                  | Earthen           | -0.405640              |             |           |           |
|                 |                        |                  | floor             | Main Material of floor | Categorical | Cement    | -0.084464 |
| Titled/Wooden   | 0.200031               |                  |                   |                        |             |           |           |
| Waste / Rubbish | -0.542463              |                  |                   |                        |             |           |           |
| roof            | Main Material of roof  | Categorical      |                   |                        |             | Cardboard | -0.388435 |
|                 |                        |                  | Metallic Sheeting | -0.230421              |             |           |           |
|                 |                        |                  | Asbestos          | -0.144841              |             |           |           |
|                 |                        |                  | Bamboo/Palm       | -0.123205              |             |           |           |
|                 |                        |                  | Wood              | -0.108482              |             |           |           |
|                 |                        |                  | Earthen           | -0.094848              |             |           |           |
|                 |                        |                  | Tiled             | -0.087643              |             |           |           |
|                 |                        |                  | Concrete          | 0.086410               |             |           |           |
|                 |                        |                  | kitchen           | Independent Kitchen    | Binary      | No        | -0.209200 |
|                 |                        |                  |                   |                        |             | Yes       | 0.028389  |
| room            | Number of Rooms        | Count            |                   | 0.149054               |             |           |           |
| electri         | Electric Power         | Binary           | No                | -0.434158              |             |           |           |
|                 |                        |                  | Yes               | 0.010178               |             |           |           |
| water           | Water Source           | Categorical      | Mains inside      | 0.106606               |             |           |           |
|                 |                        |                  | Mains outside     | -0.125085              |             |           |           |

|            |                               |             |                    |           |
|------------|-------------------------------|-------------|--------------------|-----------|
|            |                               |             | Public hydrant     | -0.221008 |
|            |                               |             | Other House        | -0.232282 |
|            |                               |             | Water pipe         | -0.248469 |
| sewage     | Waste disposal                | Categorical | Dwell, river, lake | -0.335705 |
|            |                               |             | Mains              | 0.093212  |
|            |                               |             | Septic             | -0.141988 |
|            |                               |             | Ravine             | -0.239378 |
|            |                               |             | River, Lake        | -0.244539 |
| combustion | Type of fuel                  | Categorical | No sewage          | -0.321830 |
|            |                               |             | Gas tank           | 0.071834  |
|            |                               |             | Natural gas        | -0.135708 |
|            |                               |             | Wood               | -0.228368 |
|            |                               |             | Coal               | -0.385054 |
| rubbish    | Rubbish Disposal              | Categorical | Electricity        | -0.402787 |
|            |                               |             | Other              | -0.476754 |
|            |                               |             | Collected          | 0.064575  |
|            |                               |             | Public area        | -0.112264 |
|            |                               |             | Public Container   | -0.127265 |
|            |                               |             | Burnt              | -0.207659 |
|            |                               |             | Bury               | -0.333376 |
| heat       | Heating                       | Binary      | Street             | -0.352484 |
|            |                               |             | Ravine             | -0.370694 |
|            |                               |             | River, Lake        | -0.428607 |
| bulb       | Number of Bulbs               | Count       | No                 | -0.010792 |
|            |                               |             | Yes                | 0.160503  |
| sanitation | Private-Flush Toilet in house | Binary      | No                 | 0.180272  |
|            |                               |             | Yes                | -0.185733 |
| h60101     | Other Property Ownership      | Binary      | Yes                | 0.150005  |
|            |                               |             | No                 | -0.006266 |
| h60102     | Automobile                    | Binary      | Yes                | 0.040635  |
|            |                               |             | No                 | -0.070335 |
| h60103     | Van/Pick up                   | Binary      | Yes                | 0.217372  |
|            |                               |             | No                 | -0.037145 |
| h60104     | Motorcycle                    | Binary      | Yes                | 0.134830  |
|            |                               |             | No                 | -0.005224 |
| h60105     | Boat / Trajinera              | Binary      | Yes                | 0.099967  |
|            |                               |             | No                 | 0.000174  |
| h60106     | Television                    | Binary      | Yes                | -0.012057 |
|            |                               |             | No                 | -0.373232 |
| h60107     | Cable TV                      | Binary      | Yes                | 0.028456  |
|            |                               |             | No                 | -0.083285 |
| h60108     | Radio                         | Binary      | Yes                | 0.171998  |
|            |                               |             | No                 | -0.053974 |

|        |                     |     |           |
|--------|---------------------|-----|-----------|
|        |                     | Yes | 0.048774  |
|        |                     | No  | -0.097571 |
| h60109 | Music system        | Yes | 0.122251  |
|        |                     | No  | -0.295532 |
| h60110 | Iron                | Yes | 0.060723  |
|        |                     | No  | -0.300585 |
| h60111 | Food processor      | Yes | 0.055300  |
|        |                     | No  | -0.329142 |
| h60112 | Refrigerator        | Yes | 0.063081  |
|        |                     | No  | -0.355153 |
| h60113 | Gas stove           | Yes | 0.055571  |
|        |                     | No  | -0.000500 |
| h60114 | Other stove         | Yes | 0.006298  |
|        |                     | No  | -0.199982 |
| h60115 | Washer/tumble Dryer | Yes | 0.112716  |
|        |                     | No  | -0.114742 |
| h60116 | Water heater        | Yes | 0.207308  |
|        |                     | No  | -0.083285 |
| h60117 | Computer / Notebook | Yes | 0.261892  |
|        |                     | No  | -0.066320 |
| h60118 | Internet / WiFi     | Yes | 0.304679  |
|        |                     | No  | -0.124738 |
| h60119 | Microwave           | Yes | 0.192950  |
|        |                     | No  | -0.108426 |
| h60120 | Landline            | Yes | 0.205613  |
|        |                     | No  | -0.121921 |
| h60121 | Water tank          | Yes | 0.114623  |
|        |                     | No  | -0.030712 |
| h60122 | Other Water tank    | Yes | 0.165364  |
|        |                     | No  | -0.285739 |
| h60123 | Electricity Meter   | Yes | 0.029783  |
|        |                     | No  | -0.170461 |
| h60124 | Mobile Phone        | Yes | 0.094838  |
|        |                     | No  | -0.034449 |
| h60125 | Air Conditioning    | Yes | 0.225565  |

Note. First Component Eigen Value = 15.00 with 40% of the variance reproduced.

## Polychoric Correlations to Use with Principal Components Analysis

|                          | Walls   | Floors  | Roof    | Kitchen | N of Rooms | Electricity | Water Source | Sewage  | Fuel    | Rubbish Disposal | Heating | N of Bulbs | Sanitation Type | Other Property Ownership | Automobile | Van/Pick up | Motorcycle |
|--------------------------|---------|---------|---------|---------|------------|-------------|--------------|---------|---------|------------------|---------|------------|-----------------|--------------------------|------------|-------------|------------|
| Walls                    |         |         |         |         |            |             |              |         |         |                  |         |            |                 |                          |            |             |            |
| Floors                   | 0.5625  |         |         |         |            |             |              |         |         |                  |         |            |                 |                          |            |             |            |
| Roof                     | 0.6781  | 0.6151  |         |         |            |             |              |         |         |                  |         |            |                 |                          |            |             |            |
| Kitchen                  | -0.2534 | -0.3787 | -0.2958 |         |            |             |              |         |         |                  |         |            |                 |                          |            |             |            |
| N of Rooms               | 0.3573  | 0.4442  | 0.3952  | 0.0000  |            |             |              |         |         |                  |         |            |                 |                          |            |             |            |
| Electricity              | -0.4445 | -0.4603 | -0.3517 | 0.3521  | -0.4026    |             |              |         |         |                  |         |            |                 |                          |            |             |            |
| Water Source             | -0.4543 | -0.5650 | -0.5126 | 0.3270  | 0.0000     | 0.4753      |              |         |         |                  |         |            |                 |                          |            |             |            |
| Sewage                   | -0.4683 | -0.4907 | -0.4891 | 0.2432  | -0.3419    | 0.5022      | 0.6210       |         |         |                  |         |            |                 |                          |            |             |            |
| Fuel                     | -0.4734 | -0.4719 | -0.4828 | 0.2824  | -0.3289    | 0.4590      | 0.5335       | 0.5922  |         |                  |         |            |                 |                          |            |             |            |
| Rubbish Disposal         | -0.4643 | -0.4234 | -0.4417 | 0.1321  | -0.2450    | 0.4563      | 0.5294       | 0.6513  | 0.6176  |                  |         |            |                 |                          |            |             |            |
| Heating                  | -0.0175 | -0.2145 | 0.0042  | 0.1813  | -0.2202    | -0.0116     | 0.2873       | 0.2244  | 0.1034  | 0.1236           |         |            |                 |                          |            |             |            |
| N of Bulbs               | 0.5366  | 0.5474  | 0.5646  | -0.5847 | 0.5787     | -0.6054     | 0.0000       | 0.0000  | 0.0000  | 0.0000           | -0.2022 |            |                 |                          |            |             |            |
| Sanitation Type          | 0.4840  | 0.6480  | 0.5873  | -0.4050 | 0.4762     | -0.4996     | -0.7161      | -0.6742 | -0.5814 | -0.5285          | -0.3684 | 0.6505     |                 |                          |            |             |            |
| Other Property Ownership | -0.0481 | 0.0751  | 0.0012  | -0.1006 | 0.1430     | 0.0233      | 0.0055       | 0.0562  | 0.0707  | 0.1005           | -0.1347 | 0.1404     | 0.0607          |                          |            |             |            |
| Automobile               | 0.3408  | 0.4509  | 0.3709  | -0.3028 | 0.3743     | -0.3439     | -0.4503      | -0.3706 | -0.4058 | -0.3425          | -0.3421 | 0.4492     | 0.5292          | 0.1777                   |            |             |            |
| Van/Pick up              | 0.1253  | 0.2170  | 0.1840  | -0.2327 | 0.2971     | -0.2190     | -0.1697      | -0.0638 | -0.2133 | -0.0661          | -0.2253 | 0.2523     | 0.2814          | 0.2475                   | 0.1104     |             |            |
| Motorcycle               | 0.1282  | 0.1099  | 0.0810  | -0.0612 | 0.0923     | -0.1868     | -0.0608      | 0.0220  | -0.1050 | 0.0000           | 0.0035  | 0.1030     | 0.0927          | 0.1322                   | 0.1392     | 0.2075      |            |
| Boat / Trajinera         | -0.0973 | -0.0589 | -0.1084 | 0.0486  | -0.0013    | -0.0350     | 0.1336       | 0.1797  | 0.0792  | 0.2171           | 0.0710  | 0.0395     | -0.0715         | 0.1132                   | 0.0967     | 0.1780      | 0.3765     |
| Television               | 0.4498  | 0.4248  | 0.4206  | -0.3041 | 0.3803     | -0.7255     | -0.4399      | -0.4715 | -0.5516 | -0.4748          | -0.0705 | 0.5419     | 0.4893          | -0.0217                  | 0.4248     | 0.3436      | 0.1957     |
| Cable TV                 | 0.2866  | 0.4268  | 0.3110  | -0.2422 | 0.3098     | -0.4376     | -0.3786      | -0.2666 | -0.3351 | -0.2697          | -0.1991 | 0.4266     | 0.4324          | 0.1376                   | 0.4590     | 0.2583      | 0.2035     |
| Radio                    | 0.1101  | 0.1104  | 0.1265  | -0.1680 | 0.1741     | -0.2078     | -0.1492      | -0.1485 | -0.1462 | -0.1370          | -0.1212 | 0.1684     | 0.1545          | 0.0331                   | 0.1318     | 0.0814      | -0.0111    |
| Music system             | 0.2984  | 0.3577  | 0.2950  | -0.2411 | 0.3124     | -0.4216     | -0.3023      | -0.2892 | -0.3173 | -0.2634          | -0.1091 | 0.3764     | 0.3437          | 0.0917                   | 0.3205     | 0.1716      | 0.1798     |
| Iron                     | 0.4305  | 0.4539  | 0.4241  | -0.3638 | 0.4637     | -0.6000     | -0.4449      | -0.4399 | -0.5374 | -0.4390          | -0.1836 | 0.6200     | 0.5148          | 0.0277                   | 0.4403     | 0.3127      | 0.1516     |
| Food processor           | 0.4063  | 0.4225  | 0.3786  | -0.3862 | 0.4708     | -0.6097     | -0.4147      | -0.4543 | -0.5344 | -0.4273          | -0.1286 | 0.6314     | 0.4920          | 0.0222                   | 0.4207     | 0.3056      | 0.1213     |
| Refrigerator             | 0.4328  | 0.5052  | 0.4247  | -0.3783 | 0.4814     | -0.6525     | -0.4945      | -0.4608 | -0.5933 | -0.4438          | -0.2464 | 0.6852     | 0.6066          | 0.0090                   | 0.5368     | 0.4014      | 0.2140     |
| Gas stove                | 0.5225  | 0.5249  | 0.5090  | -0.3736 | 0.4471     | -0.5370     | -0.5475      | -0.5955 | -0.8634 | -0.6230          | -0.2173 | 0.5918     | 0.6341          | -0.0604                  | 0.5240     | 0.3662      | 0.1545     |
| Other stove              | -0.0364 | 0.0269  | -0.0359 | -0.0061 | 0.0447     | 0.0826      | -0.0187      | 0.0271  | 0.2205  | 0.0627           | -0.1734 | 0.0760     | 0.0103          | 0.1088                   | 0.0596     | 0.0569      | 0.0048     |
| Washer/tumble Dryer      | 0.3643  | 0.4541  | 0.3663  | -0.3470 | 0.4448     | -0.5199     | -0.4400      | -0.3829 | -0.5102 | -0.3663          | -0.2846 | 0.5727     | 0.5317          | 0.0770                   | 0.4998     | 0.3690      | 0.2260     |
| Water heater             | 0.3436  | 0.5547  | 0.5039  | -0.4341 | 0.4981     | -0.4273     | -0.5820      | -0.5577 | -0.4843 | -0.4341          | -0.4392 | 0.5597     | 0.7184          | 0.1135                   | 0.5017     | 0.3055      | 0.0254     |
| Computer / Notebook      | 0.4240  | 0.5403  | 0.4676  | -0.3337 | 0.4394     | -0.4162     | -0.5356      | -0.4721 | -0.4226 | -0.4479          | -0.2989 | 0.5523     | 0.5854          | 0.1930                   | 0.5910     | 0.2769      | 0.1577     |
| Internet / WiFi          | 0.4399  | 0.5591  | 0.4861  | -0.3451 | 0.4362     | -0.4321     | -0.5808      | -0.5236 | -0.4110 | -0.4900          | -0.2951 | 0.5270     | 0.6060          | 0.1857                   | 0.5873     | 0.2669      | 0.1272     |
| Microwave                | 0.3465  | 0.5114  | 0.3936  | -0.3487 | 0.4342     | -0.4774     | -0.4966      | -0.4407 | -0.4936 | -0.4056          | -0.3934 | 0.5507     | 0.5861          | 0.1069                   | 0.5195     | 0.3157      | 0.1369     |
| Landline                 | 0.3640  | 0.5040  | 0.4440  | -0.3748 | 0.4928     | -0.4423     | -0.5033      | -0.4861 | -0.4287 | -0.4140          | -0.2601 | 0.5393     | 0.5659          | 0.1021                   | 0.4532     | 0.2755      | 0.0489     |
| Water tank               | 0.3518  | 0.4714  | 0.4892  | -0.3103 | 0.3424     | -0.2985     | -0.3858      | -0.3504 | -0.3872 | -0.3012          | 0.0760  | 0.4361     | 0.5616          | 0.0748                   | 0.2921     | 0.2139      | 0.1025     |
| Other Water tank         | 0.3161  | 0.3249  | 0.3618  | -0.2213 | 0.2568     | -0.1717     | -0.2502      | -0.2796 | -0.2773 | -0.2442          | 0.0175  | 0.2925     | 0.2660          | 0.0885                   | 0.2649     | 0.1201      | 0.0709     |
| Electricity Meter        | 0.3627  | 0.4007  | 0.3623  | -0.3758 | 0.3730     | -0.7935     | -0.4176      | -0.3947 | -0.3428 | -0.3229          | -0.1313 | 0.4942     | 0.4814          | 0.0684                   | 0.3269     | 0.2260      | 0.0666     |
| Mobile Phone             | 0.3578  | 0.3876  | 0.3311  | -0.1683 | 0.3038     | -0.4228     | -0.3727      | -0.3664 | -0.4796 | -0.4064          | -0.1985 | 0.4844     | 0.4319          | 0.0888                   | 0.4888     | 0.2432      | 0.2247     |
| Air Conditioning         | 0.3154  | 0.3627  | 0.3012  | -0.2278 | 0.2368     | -0.3342     | -0.4259      | -0.2874 | -0.3226 | -0.3443          | -0.4493 | 0.2746     | 0.5023          | 0.0929                   | 0.4577     | 0.2600      | 0.1204     |

## Polychoric Correlations to Use with Principal Components Analysis (cont)

|                     | Boat /<br>Trajinera | Television | Cable TV | Radio  | Music<br>system | Iron    | Food<br>processor | Refrigerat<br>or | Gas stove | Other<br>stove | Washer/tu<br>mble<br>Dryer | Water<br>heater | Computer<br>/<br>Notebook | Internet /<br>WiFi | Microwav<br>e | Landline | Water<br>tank | Other<br>Water<br>tank | Electricity<br>Meter | Mobile<br>Phone |
|---------------------|---------------------|------------|----------|--------|-----------------|---------|-------------------|------------------|-----------|----------------|----------------------------|-----------------|---------------------------|--------------------|---------------|----------|---------------|------------------------|----------------------|-----------------|
| Television          | -0.0164             |            |          |        |                 |         |                   |                  |           |                |                            |                 |                           |                    |               |          |               |                        |                      |                 |
| Cable TV            | 0.1367              | 0.5867     |          |        |                 |         |                   |                  |           |                |                            |                 |                           |                    |               |          |               |                        |                      |                 |
| Radio               | -0.0462             | 0.2386     | 0.0489   |        |                 |         |                   |                  |           |                |                            |                 |                           |                    |               |          |               |                        |                      |                 |
| Music system        | 0.0436              | 0.4869     | 0.3440   | 0.0984 |                 |         |                   |                  |           |                |                            |                 |                           |                    |               |          |               |                        |                      |                 |
| Iron                | -0.0230             | 0.6638     | 0.4030   | 0.2590 | 0.4318          |         |                   |                  |           |                |                            |                 |                           |                    |               |          |               |                        |                      |                 |
| Food processor      | -0.0330             | 0.6719     | 0.3794   | 0.2611 | 0.4344          | 0.7456  |                   |                  |           |                |                            |                 |                           |                    |               |          |               |                        |                      |                 |
| Refrigerator        | 0.0723              | 0.7046     | 0.5032   | 0.2044 | 0.4541          | 0.6768  | 0.7123            |                  |           |                |                            |                 |                           |                    |               |          |               |                        |                      |                 |
| Gas stove           | -0.0608             | 0.7101     | 0.4228   | 0.2248 | 0.4220          | 0.6886  | 0.7138            | 0.7636           |           |                |                            |                 |                           |                    |               |          |               |                        |                      |                 |
| Other stove         | 0.0964              | -0.0880    | 0.0728   | 0.0819 | 0.0725          | -0.0430 | -0.0355           | -0.0370          | -0.2361   |                |                            |                 |                           |                    |               |          |               |                        |                      |                 |
| Washer/tumble Dryer | 0.0749              | 0.5907     | 0.4569   | 0.1522 | 0.4072          | 0.5873  | 0.5961            | 0.6950           | 0.6592    | -0.0150        |                            |                 |                           |                    |               |          |               |                        |                      |                 |
| Water heater        | -0.0825             | 0.4613     | 0.3743   | 0.2414 | 0.3523          | 0.5418  | 0.5348            | 0.5647           | 0.6544    | 0.0927         | 0.5130                     |                 |                           |                    |               |          |               |                        |                      |                 |
| Computer / Notebook | 0.0349              | 0.4518     | 0.5431   | 0.1395 | 0.4033          | 0.5646  | 0.5071            | 0.5851           | 0.5637    | 0.1329         | 0.5671                     | 0.5815          |                           |                    |               |          |               |                        |                      |                 |
| Internet / WiFi     | 0.0491              | 0.4282     | 0.6038   | 0.1582 | 0.3987          | 0.5574  | 0.5132            | 0.6199           | 0.5760    | 0.1513         | 0.5748                     | 0.6018          | 0.9734                    |                    |               |          |               |                        |                      |                 |
| Microwave           | 0.0011              | 0.5220     | 0.4604   | 0.1805 | 0.4011          | 0.5610  | 0.5495            | 0.6782           | 0.6427    | 0.0838         | 0.6118                     | 0.5943          | 0.6254                    | 0.6457             |               |          |               |                        |                      |                 |
| Landline            | -0.0048             | 0.4872     | 0.4381   | 0.1802 | 0.3362          | 0.5303  | 0.5845            | 0.6117           | 0.6001    | 0.0433         | 0.5483                     | 0.6129          | 0.6631                    | 0.7840             | 0.5851        |          |               |                        |                      |                 |
| Water tank          | -0.0534             | 0.4066     | 0.3161   | 0.1294 | 0.2947          | 0.4254  | 0.4299            | 0.4209           | 0.4458    | 0.0116         | 0.3567                     | 0.5909          | 0.3927                    | 0.3919             | 0.3712        | 0.4404   |               |                        |                      |                 |
| Other Water tank    | 0.0386              | 0.2407     | 0.2188   | 0.1629 | 0.2392          | 0.2917  | 0.3051            | 0.2659           | 0.2983    | 0.1087         | 0.2266                     | 0.3974          | 0.3615                    | 0.3870             | 0.2758        | 0.3753   | 0.4370        |                        |                      |                 |
| Electricity Meter   | -0.0744             | 0.5104     | 0.3131   | 0.1536 | 0.2546          | 0.4582  | 0.4638            | 0.5222           | 0.4622    | -0.0389        | 0.4096                     | 0.4356          | 0.4051                    | 0.4446             | 0.3911        | 0.4430   | 0.3530        | 0.1899                 |                      |                 |
| Mobile Phone        | 0.0751              | 0.5215     | 0.3939   | 0.0844 | 0.3856          | 0.4718  | 0.4383            | 0.5078           | 0.5641    | 0.0168         | 0.4698                     | 0.3660          | 0.6131                    | 0.5932             | 0.4890        | 0.2516   | 0.2805        | 0.2238                 | 0.3318               |                 |
| Air Conditioning    | 0.1034              | 0.3697     | 0.3822   | 0.0453 | 0.2038          | 0.3439  | 0.2584            | 0.5477           | 0.4683    | 0.1471         | 0.4521                     | 0.2827          | 0.4477                    | 0.4655             | 0.4813        | 0.3489   | 0.0309        | -0.0397                | 0.3575               | 0.4179          |

## Pearson Correlations

|                          | Walls   | Floors  | Roof    | Kitchen | N of Rooms | Electricity | Water Source | Sewage  | Fuel    | Rubbish Disposal | Heating | N of Bulbs | Sanitation Type | Other Property Ownership | Automobile | Van/Pick up | Motorcycle |
|--------------------------|---------|---------|---------|---------|------------|-------------|--------------|---------|---------|------------------|---------|------------|-----------------|--------------------------|------------|-------------|------------|
| Walls                    |         |         |         |         |            |             |              |         |         |                  |         |            |                 |                          |            |             |            |
| Floors                   | 0.2910  |         |         |         |            |             |              |         |         |                  |         |            |                 |                          |            |             |            |
| Roof                     | 0.4307  | 0.4020  |         |         |            |             |              |         |         |                  |         |            |                 |                          |            |             |            |
| Kitchen                  | -0.1388 | -0.1885 | -0.1583 |         |            |             |              |         |         |                  |         |            |                 |                          |            |             |            |
| N of Rooms               | 0.2109  | 0.3619  | 0.2820  | -0.3606 |            |             |              |         |         |                  |         |            |                 |                          |            |             |            |
| Electricity              | -0.1518 | -0.1214 | -0.1116 | 0.0996  | -0.1012    |             |              |         |         |                  |         |            |                 |                          |            |             |            |
| Water Source             | -0.2526 | -0.3128 | -0.3299 | 0.1416  | -0.2383    | 0.1750      |              |         |         |                  |         |            |                 |                          |            |             |            |
| Sewage                   | -0.2525 | -0.2954 | -0.3137 | 0.1294  | -0.2276    | 0.1859      | 0.3838       |         |         |                  |         |            |                 |                          |            |             |            |
| Fuel                     | -0.2651 | -0.2985 | -0.3402 | 0.1514  | -0.2272    | 0.1447      | 0.3394       | 0.3995  |         |                  |         |            |                 |                          |            |             |            |
| Rubbish Disposal         | -0.2444 | -0.2649 | -0.3114 | 0.0649  | -0.1653    | 0.1488      | 0.3590       | 0.4380  | 0.4505  |                  |         |            |                 |                          |            |             |            |
| Heating                  | -0.0194 | -0.0917 | -0.0025 | 0.0468  | -0.1258    | -0.0019     | 0.0757       | 0.0624  | 0.0456  | 0.0446           |         |            |                 |                          |            |             |            |
| N of Bulbs               | 0.2089  | 0.4101  | 0.3164  | -0.2239 | 0.5787     | -0.1391     | -0.2562      | -0.2562 | -0.2493 | -0.2164          | -0.1496 |            |                 |                          |            |             |            |
| Sanitation Type          | 0.2389  | 0.4389  | 0.3999  | -0.1984 | 0.3612     | -0.1133     | -0.4143      | -0.4097 | -0.3753 | -0.3301          | -0.1395 | 0.4042     |                 |                          |            |             |            |
| Other Property Ownership | -0.0130 | 0.0404  | 0.0006  | -0.0354 | 0.0944     | 0.0047      | 0.0072       | 0.0207  | 0.0340  | 0.0493           | -0.0481 | 0.1076     | 0.0300          |                          |            |             |            |
| Automobile               | 0.1221  | 0.2799  | 0.1967  | -0.1149 | 0.2837     | -0.0561     | -0.1899      | -0.1723 | -0.1991 | -0.1678          | -0.1493 | 0.3536     | 0.3043          | 0.0866                   |            |             |            |
| Van/Pick up              | 0.0663  | 0.1269  | 0.0995  | -0.0880 | 0.2186     | -0.0391     | -0.0744      | -0.0456 | -0.1045 | -0.0372          | -0.0924 | 0.2007     | 0.1567          | 0.1221                   | 0.0586     |             |            |
| Motorcycle               | 0.0264  | 0.0404  | 0.0236  | -0.0156 | 0.0429     | -0.0183     | -0.0159      | -0.0074 | -0.0311 | -0.0012          | 0.0008  | 0.0595     | 0.0327          | 0.0419                   | 0.0491     | 0.0750      |            |
| Boat / Trajinera         | -0.0330 | -0.0111 | -0.0251 | 0.0072  | -0.0003    | -0.0023     | 0.0327       | 0.0236  | 0.0153  | 0.0440           | 0.0072  | 0.0114     | -0.0131         | 0.0188                   | 0.0174     | 0.0336      | 0.0789     |
| Television               | 0.2164  | 0.1878  | 0.2142  | -0.1250 | 0.1792     | -0.2995     | -0.2237      | -0.2509 | -0.2929 | -0.2458          | -0.0176 | 0.1879     | 0.2048          | -0.0073                  | 0.1235     | 0.1011      | 0.0357     |
| Cable TV                 | 0.1170  | 0.2783  | 0.1794  | -0.1042 | 0.2397     | -0.0747     | -0.1791      | -0.1539 | -0.1824 | -0.1489          | -0.0830 | 0.3204     | 0.2668          | 0.0683                   | 0.2816     | 0.1476      | 0.0749     |
| Radio                    | 0.0583  | 0.0734  | 0.0819  | -0.0813 | 0.1328     | -0.0514     | -0.0772      | -0.0801 | -0.0905 | -0.0822          | -0.0490 | 0.1265     | 0.0985          | 0.0165                   | 0.0763     | 0.0459      | -0.0040    |
| Music system             | 0.1357  | 0.2395  | 0.1823  | -0.1127 | 0.2402     | -0.0874     | -0.1576      | -0.1666 | -0.1881 | -0.1551          | -0.0447 | 0.2721     | 0.2208          | 0.0459                   | 0.1901     | 0.0977      | 0.0649     |
| Iron                     | 0.2358  | 0.2529  | 0.2606  | -0.1808 | 0.2749     | -0.1926     | -0.2451      | -0.2667 | -0.3404 | -0.2661          | -0.0548 | 0.2710     | 0.2867          | 0.0115                   | 0.1816     | 0.1309      | 0.0402     |
| Food processor           | 0.2157  | 0.2303  | 0.2266  | -0.1923 | 0.2723     | -0.2007     | -0.2184      | -0.2770 | -0.3335 | -0.2540          | -0.0391 | 0.2651     | 0.2664          | 0.0091                   | 0.1690     | 0.1243      | 0.0321     |
| Refrigerator             | 0.2330  | 0.2752  | 0.2604  | -0.1883 | 0.2848     | -0.2158     | -0.2661      | -0.2863 | -0.3830 | -0.2678          | -0.0681 | 0.2912     | 0.3336          | 0.0037                   | 0.2045     | 0.1570      | 0.0523     |
| Gas stove                | 0.2882  | 0.2739  | 0.3138  | -0.1816 | 0.2521     | -0.1746     | -0.3139      | -0.3620 | -0.6417 | -0.4025          | -0.0579 | 0.2509     | 0.3289          | -0.0249                  | 0.1865     | 0.1368      | 0.0377     |
| Other stove              | -0.0036 | 0.0117  | -0.0138 | -0.0019 | 0.0235     | 0.0153      | -0.0046      | 0.0167  | 0.1074  | 0.0253           | -0.0554 | 0.0500     | 0.0042          | 0.0385                   | 0.0231     | 0.0216      | 0.0011     |
| Washer/tumble Dryer      | 0.1865  | 0.2961  | 0.2390  | -0.1749 | 0.3226     | -0.1305     | -0.2467      | -0.2465 | -0.3302 | -0.2292          | -0.1028 | 0.3287     | 0.3500          | 0.0369                   | 0.2679     | 0.1936      | 0.0725     |
| Water heater             | 0.1614  | 0.3707  | 0.2996  | -0.1790 | 0.3892     | -0.0776     | -0.2814      | -0.2781 | -0.2693 | -0.2361          | -0.1900 | 0.4059     | 0.4721          | 0.0564                   | 0.3112     | 0.1770      | 0.0089     |
| Computer / Notebook      | 0.1405  | 0.3388  | 0.2375  | -0.1237 | 0.3370     | -0.0615     | -0.2152      | -0.2103 | -0.2073 | -0.2090          | -0.1280 | 0.4299     | 0.3353          | 0.0944                   | 0.3737     | 0.1542      | 0.0561     |
| Internet / WiFi          | 0.1246  | 0.3267  | 0.2173  | -0.1123 | 0.3226     | -0.0529     | -0.2004      | -0.1969 | -0.1814 | -0.1954          | -0.1236 | 0.4262     | 0.3111          | 0.0864                   | 0.3567     | 0.1411      | 0.0425     |
| Microwave                | 0.1577  | 0.3438  | 0.2426  | -0.1538 | 0.3395     | -0.0874     | -0.2462      | -0.2380 | -0.2812 | -0.2296          | -0.1663 | 0.3892     | 0.3837          | 0.0534                   | 0.3218     | 0.1833      | 0.0496     |
| Landline                 | 0.1579  | 0.3344  | 0.2608  | -0.1563 | 0.3829     | -0.0776     | -0.2378      | -0.2484 | -0.2379 | -0.2235          | -0.1099 | 0.3966     | 0.3589          | 0.0505                   | 0.2778     | 0.1585      | 0.0173     |
| Water tank               | 0.1745  | 0.3196  | 0.3195  | -0.1494 | 0.2644     | -0.0715     | -0.2063      | -0.2193 | -0.2310 | -0.1844          | 0.0310  | 0.2936     | 0.3785          | 0.0373                   | 0.1701     | 0.1207      | 0.0364     |
| Other Water tank         | 0.0975  | 0.1790  | 0.1627  | -0.0752 | 0.1800     | -0.0286     | -0.0883      | -0.1173 | -0.1184 | -0.1066          | 0.0058  | 0.2353     | 0.1356          | 0.0380                   | 0.1383     | 0.0583      | 0.0221     |
| Electricity Meter        | 0.1887  | 0.1910  | 0.1923  | -0.1726 | 0.1963     | -0.3228     | -0.2243      | -0.2141 | -0.1769 | -0.1665          | -0.0337 | 0.1948     | 0.2228          | 0.0234                   | 0.1147     | 0.0809      | 0.0159     |
| Mobile Phone             | 0.1664  | 0.2530  | 0.2131  | -0.0821 | 0.2213     | -0.1092     | -0.2125      | -0.2282 | -0.3094 | -0.2568          | -0.0741 | 0.2806     | 0.2785          | 0.0425                   | 0.2617     | 0.1296      | 0.0719     |
| Air Conditioning         | 0.0873  | 0.1915  | 0.1339  | -0.0723 | 0.1544     | -0.0407     | -0.1422      | -0.1152 | -0.1333 | -0.1335          | -0.2032 | 0.2232     | 0.2345          | 0.0384                   | 0.2480     | 0.1287      | 0.0377     |

## Pearson Correlations (cont)

|                     | Boat /<br>Trajinera | Television | Cable TV | Radio  | Music<br>system | Iron    | Food<br>processor | Refrigerator | Gas stove | Other stove | Washer/tum-<br>ble Dryer | Water<br>heater | Computer /<br>Notebook | Internet /<br>WiFi | Microwave | Landline | Water tank | Other Water<br>tank | Electricity<br>Meter | Mobile<br>Phone |  |
|---------------------|---------------------|------------|----------|--------|-----------------|---------|-------------------|--------------|-----------|-------------|--------------------------|-----------------|------------------------|--------------------|-----------|----------|------------|---------------------|----------------------|-----------------|--|
| Television          | -0.0021             |            |          |        |                 |         |                   |              |           |             |                          |                 |                        |                    |           |          |            |                     |                      |                 |  |
| Cable TV            | 0.0256              | 0.1734     |          |        |                 |         |                   |              |           |             |                          |                 |                        |                    |           |          |            |                     |                      |                 |  |
| Radio               | -0.0085             | 0.1006     | 0.0299   |        |                 |         |                   |              |           |             |                          |                 |                        |                    |           |          |            |                     |                      |                 |  |
| Music system        | 0.0080              | 0.1825     | 0.2157   | 0.0624 |                 |         |                   |              |           |             |                          |                 |                        |                    |           |          |            |                     |                      |                 |  |
| Iron                | -0.0037             | 0.3553     | 0.1890   | 0.1406 | 0.2241          |         |                   |              |           |             |                          |                 |                        |                    |           |          |            |                     |                      |                 |  |
| Food processor      | -0.0052             | 0.3643     | 0.1736   | 0.1384 | 0.2189          | 0.4861  |                   |              |           |             |                          |                 |                        |                    |           |          |            |                     |                      |                 |  |
| Refrigerator        | 0.0101              | 0.3892     | 0.2231   | 0.1092 | 0.2308          | 0.4227  | 0.4523            |              |           |             |                          |                 |                        |                    |           |          |            |                     |                      |                 |  |
| Gas stove           | -0.0096             | 0.3995     | 0.1813   | 0.1148 | 0.2037          | 0.4249  | 0.4469            | 0.4967       |           |             |                          |                 |                        |                    |           |          |            |                     |                      |                 |  |
| Other stove         | 0.0136              | -0.0265    | 0.0296   | 0.0336 | 0.0300          | -0.0155 | -0.0125           | -0.0131      | -0.0934   |             |                          |                 |                        |                    |           |          |            |                     |                      |                 |  |
| Washer/tumble Dryer | 0.0129              | 0.2652     | 0.2686   | 0.0952 | 0.2557          | 0.3460  | 0.3434            | 0.4133       | 0.3694    | -0.0061     |                          |                 |                        |                    |           |          |            |                     |                      |                 |  |
| Water heater        | -0.0140             | 0.1569     | 0.2348   | 0.1504 | 0.2238          | 0.2520  | 0.2405            | 0.2545       | 0.2620    | 0.0382      | 0.3092                   |                 |                        |                    |           |          |            |                     |                      |                 |  |
| Computer / Notebook | 0.0060              | 0.1274     | 0.3408   | 0.0806 | 0.2410          | 0.2155  | 0.1927            | 0.2144       | 0.1935    | 0.0534      | 0.2995                   | 0.3680          |                        |                    |           |          |            |                     |                      |                 |  |
| Internet / WiFi     | 0.0080              | 0.1065     | 0.3639   | 0.0850 | 0.2212          | 0.1840  | 0.1681            | 0.1880       | 0.1669    | 0.0586      | 0.2689                   | 0.3581          | 0.7867                 |                    |           |          |            |                     |                      |                 |  |
| Microwave           | 0.0002              | 0.1801     | 0.2951   | 0.1136 | 0.2595          | 0.2711  | 0.2572            | 0.3074       | 0.2741    | 0.0347      | 0.3816                   | 0.3979          | 0.3968                 | 0.3803             |           |          |            |                     |                      |                 |  |
| Landline            | -0.0009             | 0.1604     | 0.2782   | 0.1114 | 0.2123          | 0.2441  | 0.2536            | 0.2660       | 0.2434    | 0.0176      | 0.3278                   | 0.4110          | 0.4323                 | 0.4959             | 0.3896    |          |            |                     |                      |                 |  |
| Water tank          | -0.0098             | 0.1672     | 0.1956   | 0.0826 | 0.1894          | 0.2311  | 0.2274            | 0.2248       | 0.2261    | 0.0048      | 0.2268                   | 0.3857          | 0.2289                 | 0.2105             | 0.2376    | 0.2788   |            |                     |                      |                 |  |
| Other Water tank    | 0.0061              | 0.0680     | 0.1155   | 0.0844 | 0.1264          | 0.1097  | 0.1100            | 0.0996       | 0.1026    | 0.0399      | 0.1106                   | 0.2182          | 0.1955                 | 0.2051             | 0.1474    | 0.2054   | 0.2249     |                     |                      |                 |  |
| Electricity Meter   | -0.0111             | 0.2419     | 0.1235   | 0.0708 | 0.1127          | 0.2317  | 0.2340            | 0.2733       | 0.2303    | -0.0121     | 0.1988                   | 0.1683          | 0.1340                 | 0.1236             | 0.1604    | 0.1681   | 0.1609     | 0.0623              |                      |                 |  |
| Mobile Phone        | 0.0129              | 0.2345     | 0.2312   | 0.0525 | 0.2413          | 0.2711  | 0.2447            | 0.2900       | 0.3114    | 0.0068      | 0.3044                   | 0.2194          | 0.3200                 | 0.2746             | 0.3011    | 0.1499   | 0.1768     | 0.1090              | 0.1593               |                 |  |
| Air Conditioning    | 0.0170              | 0.0849     | 0.2012   | 0.0225 | 0.1026          | 0.1168  | 0.0902            | 0.1520       | 0.1294    | 0.0536      | 0.1956                   | 0.1452          | 0.2416                 | 0.2493             | 0.2527    | 0.1818   | 0.0153     | -0.0158             | 0.0941               | 0.1824          |  |

## ***Appendix C: CONCEPTUAL AND EMPIRICAL DETAILS ABOUT OF OUR ECONOMIC STATUS INDICATORS***

### **ABSOLUTE WEALTH**

Asset indices derived through principal component analysis (PCA) are continuous indicators which are widely used to measure standards of living (e.g. Jean et al 2016; Boerma, et al 2018; Heft-Neal et al 2018; Cao et al 2019; Watmough et al 2019), in particular when information on income is unavailable (as in our case) or not reliable. The use of wealth to derive indicators of economic status in our paper is not only due to the unavailability of income, but it is also supported by the considerations that:

- i) information on assets is more reliable than information on income/expenditures in developing countries contexts (due to large informal economy, under-reporting, seasonality, etc.) – see Deaton (2000) and Filmer and Pritchett (2001);
- ii) wealth is useful to examine socioeconomic inequalities in health – e.g. wealth provides better information on the ability to face health shocks (Pollack et al (2007));
- iii) wealth is particularly relevant given our paper's specific purposes: wealth has been argued to be more able than income to capture psychosocial mechanisms of economic inequality given the greater visibility of assets compared to income (Heffetz 2011; Sweet 2011; Hicks and Hicks 2014) – the importance of visibility of assets for the effects of inequality to be exerted has also been experimentally shown by Nishi et al (2015).

### **RELATIVE DEPRIVATION**

We use the wealth information to derive relative deprivation indices because as mentioned the visible character of assets makes wealth particularly suitable for the construction of indices of relative economic status (e.g. Heffetz 2011; Hicks and Hicks 2014). We employ linear as well as non-linear (concave) indices available from the relative deprivation literature (Yitzhaki 1979; Esposito 2010), which differ in the functional form adopted by the index and in particular in the assumptions regarding the sensitivity to other's wealth. The Yitzhaki (1979) index of relative deprivation is based on the difference between individual  $i$ 's achievement and the achievements of better-off individuals in her reference group. Denoting individual  $i$ 's and individual  $j$ 's levels of wealth with  $y_i$  and  $y_j$ , respectively, for an increasingly ordered wealth vector  $y = (y_1, \dots, y_N)$ , the Yitzhaki index reads as

$$RDY(y_i, y_j) = \sum_{j=i+1}^N \frac{y_j - y_i}{N},$$

while the Esposito index (which we use below in one of the robustness checks below) replaces the linear functional form with a hyperbolic function

$$RDE(y_i, y_j) = \sum_{j=i+1}^N \frac{1 - ((y_i)^\beta / (y_j)^\beta)}{N}, \beta > 0.$$

Results do not change depending on the functional form used.  $N$  is the size of the reference group.

The reference group is chosen following a criterion of geographic proximity (individuals living in the same municipality, yielding a total of 712 reference groups). Geographical proximity has indeed proved useful for the study of relative deprivation in Mexico (Esposito and Villaseñor 2019) and concurs with Deaton's (2001) view that "people almost certainly compare themselves to their immediate geographical neighbours" (p. 21). Robustness checks are carried out with indices derived using reference groups based on additional demographic characteristics – results are also in this case confirmed and are available upon request.

#### RELATIVE AFFLUENCE

The Yitzhaki index of relative affluence reads as

$$RAY(y_i, y_j) = \sum_{j=1}^{i-1} \frac{y_i - y_j}{N}.$$

No other functional forms have been employed in the literature for indices of relative affluence (Esposito 2018).

#### References used in Sections B and C

Boerma, T., Requejo, J., Victora, C. G., Amouzou, A., George, A., Agyepong, I., ... & Borghi, J. (2018). Countdown to 2030: tracking progress towards universal coverage for reproductive, maternal, newborn, and child health. *The Lancet*, 391(10129), 1538-1548

- Cao, G., Cui, Z., & Sun, H. (2019). Changes in health inequality for diabetes among middle-aged and older people aged 45 years and older in China from 2011 to 2015: a systematic analysis. *The Lancet*, 394, S32
- Deaton, A. (2001). *Relative deprivation, inequality, and mortality* (No. w8099). National Bureau of Economic Research
- Esposito, L. (2010). Upper boundedness for the measurement of relative deprivation. *Review of Income and Wealth*, 56(3), 632-639
- Esposito, L. (2018). Relative Deprivation and Relative Satisfaction: Theoretical Approaches, in *The Handbook of Research on Economic and Social Wellbeing*, Ed. Conchita D'Ambrosio, Edward Elgar, London, Ch 15, 339-355
- Esposito, L., & Villaseñor, A. (2019). Relative Deprivation and School Enrolment. Evidence from Mexico. *Review of Income and Wealth*, 65(1), 166-186
- Heffetz, O. (2011). A test of conspicuous consumption: Visibility and income elasticities. *Review of Economics and Statistics*, 93(4), 1101-1117
- Heft-Neal, S., Burney, J., Bendavid, E., & Burke, M. (2018). Robust relationship between air quality and infant mortality in Africa. *Nature*, 559(7713), 254
- Hicks, D. L., & Hicks, J. H. (2014). Jealous of the Joneses: conspicuous consumption, inequality, and crime. *Oxford Economic Papers*, 66(4), 1090-1120
- Jean, N., Burke, M., Xie, M., Davis, W. M., Lobell, D. B., & Ermon, S. (2016). Combining satellite imagery and machine learning to predict poverty. *Science*, 353(6301), 790-794
- Kolenikov, S., & Angeles, G. (2009). Socioeconomic status measurement with discrete proxy variables: Is principal component analysis a reliable answer?. *Review of Income and Wealth*, 55(1), 128-165
- Nishi, A., Shirado, H., Rand, D. G., & Christakis, N. A. (2015). Inequality and visibility of wealth in experimental social networks. *Nature*, 526(7573), 426
- Pollack, C. E., Chideya, S., Cubbin, C., Williams, B., Dekker, M., & Braveman, P. (2007). Should health studies measure wealth?: a systematic review. *American journal of preventive medicine*, 33(3), 250-264
- Sweet, E. (2011). Symbolic capital, consumption, and health inequality. *American Journal of Public Health*, 101(2), 260-264
- Watmough, G. R., Marcinko, C. L., Sullivan, C., Tschirhart, K., Mutuo, P. K., Palm, C. A., & Svenning, J. C. (2019). Socioecologically informed use of remote sensing data to predict rural household poverty. *Proceedings of the National Academy of Sciences*, 116(4), 1213-1218
- Yitzhaki, S. (1979). Relative deprivation and the Gini coefficient. *The quarterly journal of economics*, 321-324

## Appendix D: FULL REGRESSION OUTPUT SHOWING ALL COVARIATES

|                           | State Inequality   |               |                    |               |                    |               |                    |               |                    |               |
|---------------------------|--------------------|---------------|--------------------|---------------|--------------------|---------------|--------------------|---------------|--------------------|---------------|
|                           | (1)                |               | (2)                |               | (3)                |               | (4)                |               | (5)                |               |
|                           | Beta               | 95% CI        |
| Poorest Quartile          | 0.543<br>(0.0000)  | [0.35,0.74]   | 0.592<br>(0.0000)  | [0.39,0.79]   | 0.431<br>(0.0001)  | [0.22,0.64]   | 0.418<br>(0.0001)  | [0.21,0.63]   | 0.412<br>(0.0002)  | [0.20,0.63]   |
| 2 <sup>nd</sup> Quartile  | 0.610<br>(0.0000)  | [0.46,0.76]   | 0.562<br>(0.0000)  | [0.40,0.73]   | 0.506<br>(0.0000)  | [0.34,0.67]   | 0.455<br>(0.0000)  | [0.28,0.63]   | 0.483<br>(0.0000)  | [0.31,0.66]   |
| 3 <sup>rd</sup> Quartile  | 0.349<br>(0.0000)  | [0.22,0.48]   | 0.271<br>(0.0002)  | [0.13,0.41]   | 0.268<br>(0.0002)  | [0.13,0.41]   | 0.224<br>(0.0026)  | [0.08,0.37]   | 0.255<br>(0.0005)  | [0.11,0.40]   |
| Rel Deprivation           | 0.173<br>(0.0000)  | [0.11,0.24]   |                    |               | 0.137<br>(0.0001)  | [0.07,0.21]   | 0.120<br>(0.0009)  | [0.05,0.19]   | 0.216<br>(0.0115)  | [0.05,0.38]   |
| Rel Affluence             |                    |               | -0.162<br>(0.0000) | [-0.24,-0.09] | -0.102<br>(0.0123) | [-0.18,-0.02] | -0.367<br>(0.0003) | [-0.56,-0.17] | -0.109<br>(0.0080) | [-0.19,-0.03] |
| Gini                      | 2.340<br>(0.5260)  | [-4.89,9.57]  | 2.635<br>(0.4329)  | [-3.95,9.22]  | 2.439<br>(0.3767)  | [-2.97,7.85]  | 1.119<br>(0.5998)  | [-3.06,5.30]  | 2.831<br>(0.2616)  | [-2.11,7.77]  |
| Rel DeprivationGini       |                    |               |                    |               |                    |               | -0.450<br>(0.3036) | [-1.31,0.41]  |                    |               |
| Rel AffluenceGini         |                    |               |                    |               |                    |               |                    |               | 1.342<br>(0.0048)  | [0.41,2.27]   |
| HH Size                   | 0.031<br>(0.0133)  | [0.01,0.06]   | 0.030<br>(0.0179)  | [0.01,0.05]   | 0.034<br>(0.0073)  | [0.01,0.06]   | 0.036<br>(0.0046)  | [0.01,0.06]   | 0.035<br>(0.0062)  | [0.01,0.06]   |
| Female                    | 1.681<br>(0.0000)  | [1.56,1.80]   | 1.690<br>(0.0000)  | [1.57,1.81]   | 1.682<br>(0.0000)  | [1.57,1.80]   | 1.681<br>(0.0000)  | [1.56,1.80]   | 1.682<br>(0.0000)  | [1.56,1.80]   |
| Age                       | 0.114<br>(0.0000)  | [0.10,0.13]   |
| Age 2                     | -0.001<br>(0.0000) | [-0.00,-0.00] |
| Married                   | -0.394<br>(0.0000) | [-0.49,-0.30] | -0.400<br>(0.0000) | [-0.49,-0.31] | -0.384<br>(0.0000) | [-0.48,-0.29] | -0.373<br>(0.0000) | [-0.47,-0.28] | -0.381<br>(0.0000) | [-0.47,-0.29] |
| No education / Primary    | -0.379<br>(0.0000) | [-0.49,-0.27] | -0.375<br>(0.0000) | [-0.49,-0.26] | -0.380<br>(0.0000) | [-0.49,-0.27] | -0.387<br>(0.0000) | [-0.50,-0.27] | -0.382<br>(0.0000) | [-0.50,-0.27] |
| Secondary                 | -0.902<br>(0.0000) | [-1.03,-0.77] | -0.883<br>(0.0000) | [-1.02,-0.75] | -0.892<br>(0.0000) | [-1.02,-0.76] | -0.901<br>(0.0000) | [-1.03,-0.77] | -0.895<br>(0.0000) | [-1.03,-0.76] |
| Not Employed              | 0.630<br>(0.0000)  | [0.41,0.85]   | 0.638<br>(0.0000)  | [0.42,0.86]   | 0.635<br>(0.0000)  | [0.41,0.85]   | 0.637<br>(0.0000)  | [0.42,0.86]   | 0.636<br>(0.0000)  | [0.42,0.86]   |
| Retired                   | -0.112<br>(0.3718) | [-0.36,0.13]  | -0.112<br>(0.3705) | [-0.36,0.13]  | -0.113<br>(0.3651) | [-0.36,0.13]  | -0.127<br>(0.3118) | [-0.37,0.12]  | -0.118<br>(0.3466) | [-0.36,0.13]  |
| Student                   | 0.455<br>(0.0067)  | [0.13,0.78]   | 0.451<br>(0.0072)  | [0.12,0.78]   | 0.462<br>(0.0059)  | [0.13,0.79]   | 0.467<br>(0.0054)  | [0.14,0.80]   | 0.463<br>(0.0058)  | [0.13,0.79]   |
| House Work                | -0.042<br>(0.4957) | [-0.16,0.08]  | -0.051<br>(0.3980) | [-0.17,0.07]  | -0.043<br>(0.4780) | [-0.16,0.08]  | -0.045<br>(0.4613) | [-0.16,0.07]  | -0.043<br>(0.4773) | [-0.16,0.08]  |
| Other Act                 | 0.521<br>(0.0002)  | [0.25,0.80]   | 0.522<br>(0.0002)  | [0.25,0.80]   | 0.524<br>(0.0002)  | [0.25,0.80]   | 0.524<br>(0.0002)  | [0.25,0.80]   | 0.523<br>(0.0002)  | [0.25,0.80]   |
| Social Programme          | 0.006<br>(0.9263)  | [-0.11,0.12]  | -0.014<br>(0.8197) | [-0.13,0.10]  | 0.007<br>(0.9047)  | [-0.11,0.12]  | 0.016<br>(0.7944)  | [-0.10,0.13]  | 0.010<br>(0.8626)  | [-0.11,0.13]  |
| Chronic Health Problem    | 1.184<br>(0.0000)  | [1.06,1.31]   | 1.187<br>(0.0000)  | [1.06,1.32]   | 1.191<br>(0.0000)  | [1.06,1.32]   | 1.198<br>(0.0000)  | [1.07,1.33]   | 1.192<br>(0.0000)  | [1.06,1.32]   |
| Victim of Violence        | 2.433<br>(0.0000)  | [2.14,2.73]   | 2.446<br>(0.0000)  | [2.15,2.74]   | 2.438<br>(0.0000)  | [2.14,2.73]   | 2.451<br>(0.0000)  | [2.16,2.75]   | 2.441<br>(0.0000)  | [2.15,2.74]   |
| Limitations in Activities | 1.083<br>(0.0000)  | [0.99,1.18]   | 1.087<br>(0.0000)  | [0.99,1.18]   | 1.087<br>(0.0000)  | [0.99,1.18]   | 1.093<br>(0.0000)  | [1.00,1.19]   | 1.088<br>(0.0000)  | [0.99,1.18]   |
| Drinks Yearly             | 0.189<br>(0.0005)  | [0.08,0.30]   | 0.192<br>(0.0004)  | [0.08,0.30]   | 0.190<br>(0.0005)  | [0.08,0.30]   | 0.190<br>(0.0005)  | [0.08,0.30]   | 0.190<br>(0.0005)  | [0.08,0.30]   |
| Drinks Monthly            | 0.186<br>(0.0053)  | [0.06,0.32]   | 0.188<br>(0.0049)  | [0.06,0.32]   | 0.186<br>(0.0053)  | [0.06,0.32]   | 0.186<br>(0.0054)  | [0.05,0.32]   | 0.187<br>(0.0052)  | [0.06,0.32]   |
| Drinks Weekly/Daily       | 0.422              | [0.26,0.58]   | 0.431              | [0.27,0.59]   | 0.427              | [0.27,0.59]   | 0.430              | [0.27,0.59]   | 0.428              | [0.27,0.59]   |

|               |                                |              |                                |              |                                |              |                                |               |                                |              |
|---------------|--------------------------------|--------------|--------------------------------|--------------|--------------------------------|--------------|--------------------------------|---------------|--------------------------------|--------------|
| Has Insurance | (0.0000)<br>-0.027<br>(0.6208) | [-0.14,0.08] | (0.0000)<br>-0.042<br>(0.4493) | [-0.15,0.07] | (0.0000)<br>-0.032<br>(0.5603) | [-0.14,0.08] | (0.0000)<br>-0.039<br>(0.4836) | [-0.15,0.07]  | (0.0000)<br>-0.034<br>(0.5409) | [-0.14,0.07] |
| Hospitals/Pop | (0.2049)<br>-0.090<br>(0.2049) | [-0.23,0.05] | (0.1965)<br>-0.084<br>(0.1965) | [-0.21,0.04] | (0.1004)<br>-0.088<br>(0.1004) | [-0.19,0.02] | (0.0321)<br>-0.086<br>(0.0321) | [-0.17,-0.01] | (0.0710)<br>-0.087<br>(0.0710) | [-0.18,0.01] |
| Mean Wealth   | (0.3061)<br>0.180<br>(0.3061)  | [-0.16,0.53] | (0.1940)<br>0.208<br>(0.1940)  | [-0.11,0.52] | (0.1805)<br>0.177<br>(0.1805)  | [-0.08,0.43] | (0.0825)<br>0.173<br>(0.0825)  | [-0.02,0.37]  | (0.1397)<br>0.176<br>(0.1397)  | [-0.06,0.41] |
| Constant      | (0.2683)<br>-1.916<br>(0.2683) | [-5.31,1.48] | (0.2498)<br>-1.818<br>(0.2498) | [-4.91,1.28] | (0.1833)<br>-1.736<br>(0.1833) | [-4.29,0.82] | (0.1609)<br>-1.408<br>(0.1609) | [-3.38,0.56]  | (0.1328)<br>-1.778<br>(0.1328) | [-4.10,0.54] |
| Observations  | 44,324                         |              | 44,324                         |              | 44,324                         |              | 44,324                         |               | 44,324                         |              |
| Overall-R2    | 0.0881                         |              | 0.0880                         |              | 0.0882                         |              | 0.0884                         |               | 0.0883                         |              |
| Between-R2    | 0.3099                         |              | 0.3199                         |              | 0.3203                         |              | 0.3355                         |               | 0.3188                         |              |
| Within-R2     | 0.0867                         |              | 0.0865                         |              | 0.0868                         |              | 0.0870                         |               | 0.0868                         |              |

## Municipal Inequality

|                          | (6)                |               | (7)                |               | (8)                |               | (9)                |               | (10)               |               |
|--------------------------|--------------------|---------------|--------------------|---------------|--------------------|---------------|--------------------|---------------|--------------------|---------------|
|                          | Beta               | 95% CI        |
| Poorest Quartile         | 0.681<br>(0.0000)  | [0.42,0.94]   | 0.748<br>(0.0000)  | [0.49,1.00]   | 0.504<br>(0.0013)  | [0.20,0.81]   | 0.455<br>(0.0040)  | [0.15,0.76]   | 0.389<br>(0.0177)  | [0.07,0.71]   |
| 2 <sup>nd</sup> Quartile | 0.652<br>(0.0000)  | [0.48,0.82]   | 0.627<br>(0.0000)  | [0.43,0.83]   | 0.516<br>(0.0000)  | [0.30,0.73]   | 0.413<br>(0.0003)  | [0.19,0.64]   | 0.397<br>(0.0009)  | [0.16,0.63]   |
| 3 <sup>rd</sup> Quartile | 0.360<br>(0.0000)  | [0.23,0.49]   | 0.306<br>(0.0001)  | [0.15,0.46]   | 0.266<br>(0.0011)  | [0.11,0.42]   | 0.175<br>(0.0421)  | [0.01,0.34]   | 0.193<br>(0.0251)  | [0.02,0.36]   |
| Rel Deprivation          | 0.135<br>(0.0014)  | [0.05,0.22]   |                    |               | 0.119<br>(0.0054)  | [0.04,0.20]   | 0.095<br>(0.0297)  | [0.01,0.18]   | 0.297<br>(0.0004)  | [0.13,0.46]   |
| Rel Affluence            |                    |               | -0.122<br>(0.0086) | [-0.21,-0.03] | -0.098<br>(0.0366) | [-0.19,-0.01] | -0.385<br>(0.0002) | [-0.59,-0.18] | -0.142<br>(0.0048) | [-0.24,-0.04] |
| Gini                     | -0.707<br>(0.6798) | [-4.07,2.65]  | -0.099<br>(0.9542) | [-3.47,3.27]  | -0.371<br>(0.8294) | [-3.74,3.00]  | -1.904<br>(0.2873) | [-5.41,1.60]  | 0.984<br>(0.5861)  | [-2.56,4.53]  |
| Rel DeprivationGini      |                    |               |                    |               |                    |               | -1.282<br>(0.0140) | [-2.30,-0.26] |                    |               |
| Rel AffluenceGini        |                    |               |                    |               |                    |               |                    |               | 1.641<br>(0.0016)  | [0.62,2.66]   |
| HH Size                  | 0.038<br>(0.0024)  | [0.01,0.06]   | 0.037<br>(0.0032)  | [0.01,0.06]   | 0.039<br>(0.0019)  | [0.01,0.06]   | 0.039<br>(0.0018)  | [0.01,0.06]   | 0.040<br>(0.0018)  | [0.01,0.06]   |
| Female                   | 1.664<br>(0.0000)  | [1.55,1.78]   | 1.667<br>(0.0000)  | [1.55,1.78]   | 1.668<br>(0.0000)  | [1.55,1.79]   | 1.669<br>(0.0000)  | [1.55,1.79]   | 1.670<br>(0.0000)  | [1.55,1.79]   |
| Age                      | 0.113<br>(0.0000)  | [0.10,0.13]   | 0.112<br>(0.0000)  | [0.10,0.13]   | 0.113<br>(0.0000)  | [0.10,0.13]   | 0.113<br>(0.0000)  | [0.10,0.13]   | 0.113<br>(0.0000)  | [0.10,0.13]   |
| Age 2                    | -0.001<br>(0.0000) | [-0.00,-0.00] |
| Married                  | -0.397<br>(0.0000) | [-0.49,-0.30] | -0.400<br>(0.0000) | [-0.49,-0.31] | -0.394<br>(0.0000) | [-0.49,-0.30] | -0.391<br>(0.0000) | [-0.48,-0.30] | -0.392<br>(0.0000) | [-0.48,-0.30] |
| No education / Primary   | -0.384<br>(0.0000) | [-0.50,-0.27] | -0.385<br>(0.0000) | [-0.50,-0.27] | -0.380<br>(0.0000) | [-0.49,-0.27] | -0.381<br>(0.0000) | [-0.49,-0.27] | -0.381<br>(0.0000) | [-0.49,-0.27] |
| Secondary                | -0.888<br>(0.0000) | [-1.02,-0.75] | -0.879<br>(0.0000) | [-1.01,-0.74] | -0.870<br>(0.0000) | [-1.00,-0.74] | -0.863<br>(0.0000) | [-1.00,-0.73] | -0.866<br>(0.0000) | [-1.00,-0.73] |
| Not Employed             | 0.580<br>(0.0000)  | [0.36,0.80]   | 0.584<br>(0.0000)  | [0.37,0.80]   | 0.581<br>(0.0000)  | [0.36,0.80]   | 0.581<br>(0.0000)  | [0.36,0.80]   | 0.581<br>(0.0000)  | [0.36,0.80]   |
| Retired                  | -0.117<br>(0.3467) | [-0.36,0.13]  | -0.119<br>(0.3372) | [-0.36,0.12]  | -0.112<br>(0.3667) | [-0.36,0.13]  | -0.112<br>(0.3686) | [-0.35,0.13]  | -0.111<br>(0.3693) | [-0.35,0.13]  |
| Student                  | 0.433<br>(0.0092)  | [0.11,0.76]   | 0.428<br>(0.0101)  | [0.10,0.75]   | 0.439<br>(0.0083)  | [0.11,0.77]   | 0.448<br>(0.0071)  | [0.12,0.77]   | 0.442<br>(0.0079)  | [0.12,0.77]   |
| House Work               | -0.033<br>(0.5832) | [-0.15,0.09]  | -0.039<br>(0.5196) | [-0.16,0.08]  | -0.036<br>(0.5567) | [-0.15,0.08]  | -0.035<br>(0.5603) | [-0.15,0.08]  | -0.035<br>(0.5601) | [-0.15,0.08]  |
| Other Act                | 0.511<br>(0.0003)  | [0.24,0.79]   | 0.513<br>(0.0002)  | [0.24,0.79]   | 0.512<br>(0.0003)  | [0.24,0.79]   | 0.513<br>(0.0002)  | [0.24,0.79]   | 0.512<br>(0.0003)  | [0.24,0.79]   |
| Social Programme         | 0.006<br>(0.9162)  | [-0.11,0.12]  | 0.000<br>(0.9994)  | [-0.12,0.12]  | 0.001<br>(0.9817)  | [-0.12,0.12]  | 0.006<br>(0.9213)  | [-0.11,0.12]  | 0.004<br>(0.9502)  | [-0.11,0.12]  |
| Chronic Health Problem   | 1.185              | [1.06,1.31]   | 1.186              | [1.06,1.31]   | 1.186              | [1.06,1.31]   | 1.184              | [1.06,1.31]   | 1.184              | [1.06,1.31]   |

|                           |                               |              |                               |              |                               |              |                               |              |                               |              |
|---------------------------|-------------------------------|--------------|-------------------------------|--------------|-------------------------------|--------------|-------------------------------|--------------|-------------------------------|--------------|
| Victim of Violence        | (0.0000)<br>2.384<br>(0.0000) | [2.09,2.68]  | (0.0000)<br>2.393<br>(0.0000) | [2.10,2.69]  | (0.0000)<br>2.388<br>(0.0000) | [2.10,2.68]  | (0.0000)<br>2.389<br>(0.0000) | [2.10,2.68]  | (0.0000)<br>2.385<br>(0.0000) | [2.09,2.68]  |
| Limitations in Activities | 1.100<br>(0.0000)             | [1.01,1.19]  | 1.101<br>(0.0000)             | [1.01,1.19]  | 1.099<br>(0.0000)             | [1.01,1.19]  | 1.097<br>(0.0000)             | [1.00,1.19]  | 1.097<br>(0.0000)             | [1.00,1.19]  |
| Drinks Yearly             | 0.178<br>(0.0011)             | [0.07,0.28]  | 0.178<br>(0.0011)             | [0.07,0.28]  | 0.179<br>(0.0010)             | [0.07,0.29]  | 0.178<br>(0.0011)             | [0.07,0.28]  | 0.179<br>(0.0010)             | [0.07,0.29]  |
| Drinks Monthly            | 0.187<br>(0.0049)             | [0.06,0.32]  | 0.188<br>(0.0048)             | [0.06,0.32]  | 0.190<br>(0.0043)             | [0.06,0.32]  | 0.193<br>(0.0037)             | [0.06,0.32]  | 0.194<br>(0.0036)             | [0.06,0.32]  |
| Drinks Weekly/Daily       | 0.403<br>(0.0000)             | [0.24,0.56]  | 0.409<br>(0.0000)             | [0.25,0.57]  | 0.410<br>(0.0000)             | [0.25,0.57]  | 0.412<br>(0.0000)             | [0.25,0.57]  | 0.411<br>(0.0000)             | [0.25,0.57]  |
| Has Insurance             | -0.041<br>(0.4517)            | [-0.15,0.07] | -0.050<br>(0.3662)            | [-0.16,0.06] | -0.042<br>(0.4423)            | [-0.15,0.07] | -0.045<br>(0.4127)            | [-0.15,0.06] | -0.044<br>(0.4201)            | [-0.15,0.06] |
| Hospitals/Pop             | -0.017<br>(0.3586)            | [-0.05,0.02] | -0.018<br>(0.3471)            | [-0.06,0.02] | -0.017<br>(0.3656)            | [-0.05,0.02] | -0.018<br>(0.3446)            | [-0.06,0.02] | -0.016<br>(0.3954)            | [-0.05,0.02] |
| Mean Wealth               | 0.078<br>(0.2673)             | [-0.06,0.22] | 0.116<br>(0.0926)             | [-0.02,0.25] | 0.068<br>(0.3392)             | [-0.07,0.21] | 0.063<br>(0.3727)             | [-0.08,0.20] | 0.067<br>(0.3455)             | [-0.07,0.21] |
| Constant                  | -0.860<br>(0.2367)            | [-2.28,0.56] | -0.951<br>(0.1905)            | [-2.37,0.47] | -0.661<br>(0.3672)            | [-2.10,0.78] | -0.291<br>(0.6949)            | [-1.75,1.16] | -0.730<br>(0.3199)            | [-2.17,0.71] |
| Observations              | 44,324                        |              | 44,324                        |              | 44,324                        |              | 44,324                        |              | 44,324                        |              |
| Overall-R2                | 0.0875                        |              | 0.0874                        |              | 0.0876                        |              | 0.0878                        |              | 0.0876                        |              |
| Between-R2                | 0.0942                        |              | 0.0894                        |              | 0.0951                        |              | 0.0941                        |              | 0.0915                        |              |
| Within-R2                 | 0.0864                        |              | 0.0864                        |              | 0.0865                        |              | 0.0867                        |              | 0.0867                        |              |

For models 1-5 the second level is the State. For models 6-10 the second level is the Municipality. P-values in parenthesis.

FULL REGRESSION OUTPUT for Table 1: Multilevel linear regression models on depressive symptoms

**Appendix E: FULL PREDICTION POINTS FROM MODELS 5 AND 10 IN TABLE 2**

| Point Predictions at     | Model 5    |              | Model 10   |              |
|--------------------------|------------|--------------|------------|--------------|
|                          | Prediction | 95% CI       | Prediction | 95% CI       |
| Relative Deprivation = 0 | 3.57       | [3.49,3.65]  | 3.63       | [3.49,3.78]  |
| Relative Deprivation = 1 | 3.69       | [3.63,3.75]  | 3.73       | [3.60,3.86]  |
| Relative Deprivation = 2 | 3.81       | [3.71,3.91]  | 3.82       | [3.65,3.99]  |
| Relative Deprivation = 3 | 3.93       | [3.77,4.09]  | 3.92       | [3.69,4.15]  |
| Relative Deprivation = 4 | 4.05       | [3.82,4.28]  | 4.01       | [3.71,4.32]  |
| Relative Deprivation = 5 | 4.17       | [3.87,4.47]  | 4.11       | [3.72,4.49]  |
| Relative Deprivation = 6 | 4.29       | [3.92,4.65]  | 4.20       | [3.74,4.67]  |
| Relative Deprivation = 7 | 4.50       | [4.01, 4.99] | 4.37       | [3.76, 4.98] |

*Average Marginal Predictions for different values of Relative Deprivation from Models 5 and 10*

| Point Predictions at   | Gini = 0   |             | Gini = 0.5 |             |
|------------------------|------------|-------------|------------|-------------|
|                        | Prediction | 95% CI      | Prediction | 95% CI      |
| Relative Affluence = 0 | 3.71       | [3.37,4.05] | 4.16       | [2.81,5.51] |
| Relative Affluence = 1 | 3.48       | [3.15,3.80] | 4.46       | [3.14,5.78] |
| Relative Affluence = 2 | 3.24       | [2.89,3.59] | 4.76       | [3.41,6.12] |
| Relative Affluence = 3 | 3.01       | [2.60,3.42] | 5.07       | [3.62,6.52] |
| Relative Affluence = 4 | 2.78       | [2.29,3.27] | 5.37       | [3.78,6.97] |
| Relative Affluence = 5 | 2.55       | [1.96,3.13] | 5.68       | [3.90,7.45] |
| Relative Affluence = 6 | 2.31       | [1.63,3.00] | 5.98       | [4.00,7.97] |
| Relative Affluence = 7 | 2.08       | [1.29,2.87] | 6.29       | [4.07,8.50] |

*Average Marginal Predictions for different values of Relative Affluence from Model 5*

| Point Predictions at   | Gini = 0   |             | Gini = 0.5 |             |
|------------------------|------------|-------------|------------|-------------|
|                        | Prediction | 95% CI      | Prediction | 95% CI      |
| Relative Affluence = 0 | 3.95       | [3.73,4.17] | 3.19       | [1.96,4.42] |
| Relative Affluence = 1 | 3.73       | [3.53,3.93] | 3.62       | [2.44,4.80] |
| Relative Affluence = 2 | 3.51       | [3.27,3.75] | 4.06       | [2.83,5.29] |
| Relative Affluence = 3 | 3.29       | [2.96,3.61] | 4.49       | [3.13,5.86] |
| Relative Affluence = 4 | 3.07       | [2.64,3.49] | 4.93       | [3.37,6.49] |
| Relative Affluence = 5 | 2.85       | [2.31,3.38] | 5.37       | [3.56,7.17] |
| Relative Affluence = 6 | 2.63       | [1.98,3.27] | 5.80       | [3.72,7.88] |
| Relative Affluence = 7 | 2.40       | [1.64,3.17] | 6.24       | [3.86,8.61] |

*Average Marginal Predictions for different values of Relative Affluence from Model 10*

## Appendix F: ROBUSTNESS CHECKS

We carry out a number of robustness checks (all of them multilevel models at State and Municipal levels). For each of them, rationale and empirical evidence are provided below – in all cases our results are confirmed.

### 1) Alternative outcome variable and regression model

While our main outcome measure is convenient for estimation purposes, it introduces an assumption of cardinality. We therefore test the robustness of our results by estimating Poisson multilevel regression models where the dependent variable is a count measure ranging from 0 to 7 indicating the number of items where the depression symptom has occurred more than once a week.

|                           | MUNICIPAL LEVEL |               |         |        |               |         | STATE LEVEL |               |         |        |               |         |        |               |         |        |               |         |
|---------------------------|-----------------|---------------|---------|--------|---------------|---------|-------------|---------------|---------|--------|---------------|---------|--------|---------------|---------|--------|---------------|---------|
|                           | (1)             |               | (2)     |        | (3)           |         | (4)         |               | (5)     |        | (6)           |         |        |               |         |        |               |         |
|                           | Beta            | 95% CI        | P-Value | Beta   | 95% CI        | P-Value | Beta        | 95% CI        | P-Value | Beta   | 95% CI        | P-Value | Beta   | 95% CI        | P-Value | Beta   | 95% CI        | P-Value |
| Poorest Quartile          | 0.219           | [0.16,0.28]   | 0.0000  | 0.146  | [0.07,0.22]   | 0.0001  | 0.116       | [0.04,0.19]   | 0.0022  | 0.157  | [0.11,0.20]   | 0.0000  | 0.117  | [0.07,0.17]   | 0.0000  | 0.110  | [0.06,0.16]   | 0.0000  |
| 2 <sup>nd</sup> Quartile  | 0.207           | [0.17,0.25]   | 0.0000  | 0.150  | [0.10,0.20]   | 0.0000  | 0.109       | [0.05,0.16]   | 0.0001  | 0.189  | [0.16,0.22]   | 0.0000  | 0.151  | [0.11,0.19]   | 0.0000  | 0.137  | [0.10,0.18]   | 0.0000  |
| 3 <sup>rd</sup> Quartile  | 0.116           | [0.08,0.15]   | 0.0000  | 0.077  | [0.04,0.12]   | 0.0001  | 0.044       | [0.00,0.09]   | 0.0377  | 0.113  | [0.08,0.14]   | 0.0000  | 0.084  | [0.05,0.12]   | 0.0000  | 0.072  | [0.04,0.11]   | 0.0000  |
| Rel Deprivation           | 0.035           | [0.02,0.05]   | 0.0002  | 0.029  | [0.01,0.05]   | 0.0019  | 0.023       | [0.00,0.04]   | 0.0157  | 0.053  | [0.04,0.07]   | 0.0000  | 0.042  | [0.03,0.06]   | 0.0000  | 0.039  | [0.02,0.05]   | 0.0000  |
| Rel Affluence             |                 |               |         | -0.041 | [-0.06,-0.02] | 0.0005  | -0.137      | [-0.19,-0.09] | 0.0000  |        |               |         | -0.037 | [-0.06,-0.02] | 0.0002  | -0.103 | [-0.15,-0.05] | 0.0000  |
| Gini                      | -0.305          | [-1.50,0.89]  | 0.6186  | -0.191 | [-1.39,1.01]  | 0.7553  | -0.636      | [-1.86,0.59]  | 0.3079  | 0.639  | [-2.96,4.23]  | 0.7276  | 0.685  | [-2.89,4.26]  | 0.7070  | 0.406  | [-3.16,3.97]  | 0.8238  |
| Rel Affluence*Gini        |                 |               |         |        |               |         | 0.537       | [0.28,0.79]   | 0.0000  |        |               |         |        |               |         | 0.338  | [0.11,0.56]   | 0.0034  |
| N people in HH            | 0.015           | [0.01,0.02]   | 0.0000  | 0.015  | [0.01,0.02]   | 0.0000  | 0.015       | [0.01,0.02]   | 0.0000  | 0.012  | [0.01,0.02]   | 0.0000  | 0.012  | [0.01,0.02]   | 0.0000  | 0.012  | [0.01,0.02]   | 0.0000  |
| Female                    | 0.581           | [0.55,0.61]   | 0.0000  | 0.583  | [0.56,0.61]   | 0.0000  | 0.583       | [0.56,0.61]   | 0.0000  | 0.589  | [0.56,0.62]   | 0.0000  | 0.590  | [0.56,0.62]   | 0.0000  | 0.590  | [0.56,0.62]   | 0.0000  |
| Age                       | 0.038           | [0.03,0.04]   | 0.0000  | 0.039  | [0.04,0.04]   | 0.0000  | 0.039       | [0.04,0.04]   | 0.0000  | 0.039  | [0.04,0.04]   | 0.0000  | 0.040  | [0.04,0.04]   | 0.0000  | 0.039  | [0.04,0.04]   | 0.0000  |
| Age <sup>2</sup>          | -0.000          | [-0.00,-0.00] | 0.0000  | -0.000 | [-0.00,-0.00] | 0.0000  | -0.000      | [-0.00,-0.00] | 0.0000  | -0.000 | [-0.00,-0.00] | 0.0000  | -0.000 | [-0.00,-0.00] | 0.0000  | -0.000 | [-0.00,-0.00] | 0.0000  |
| Married                   | -0.126          | [-0.15,-0.10] | 0.0000  | -0.124 | [-0.15,-0.10] | 0.0000  | -0.124      | [-0.14,-0.10] | 0.0000  | -0.123 | [-0.14,-0.10] | 0.0000  | -0.122 | [-0.14,-0.10] | 0.0000  | -0.121 | [-0.14,-0.10] | 0.0000  |
| No education / Primary    | -0.106          | [-0.13,-0.08] | 0.0000  | -0.104 | [-0.13,-0.08] | 0.0000  | -0.104      | [-0.13,-0.08] | 0.0000  | -0.105 | [-0.13,-0.08] | 0.0000  | -0.105 | [-0.13,-0.08] | 0.0000  | -0.105 | [-0.13,-0.08] | 0.0000  |
| Secondary                 | -0.319          | [-0.35,-0.29] | 0.0000  | -0.311 | [-0.34,-0.28] | 0.0000  | -0.309      | [-0.34,-0.28] | 0.0000  | -0.327 | [-0.36,-0.29] | 0.0000  | -0.321 | [-0.35,-0.29] | 0.0000  | -0.321 | [-0.35,-0.29] | 0.0000  |
| Not Employed              | 0.192           | [0.15,0.24]   | 0.0000  | 0.192  | [0.15,0.24]   | 0.0000  | 0.193       | [0.15,0.24]   | 0.0000  | 0.215  | [0.17,0.26]   | 0.0000  | 0.216  | [0.17,0.26]   | 0.0000  | 0.216  | [0.17,0.26]   | 0.0000  |
| Retired                   | 0.012           | [-0.05,0.07]  | 0.6838  | 0.014  | [-0.04,0.07]  | 0.6245  | 0.014       | [-0.04,0.07]  | 0.6221  | 0.013  | [-0.04,0.07]  | 0.6501  | 0.015  | [-0.04,0.07]  | 0.6157  | 0.013  | [-0.04,0.07]  | 0.6436  |
| Student                   | 0.146           | [0.06,0.23]   | 0.0011  | 0.147  | [0.06,0.23]   | 0.0010  | 0.150       | [0.06,0.24]   | 0.0008  | 0.154  | [0.07,0.24]   | 0.0005  | 0.155  | [0.07,0.24]   | 0.0005  | 0.156  | [0.07,0.24]   | 0.0004  |
| House Work                | -0.009          | [-0.03,0.02]  | 0.5038  | -0.010 | [-0.03,0.02]  | 0.4572  | -0.009      | [-0.03,0.02]  | 0.4627  | -0.010 | [-0.04,0.01]  | 0.4106  | -0.011 | [-0.04,0.01]  | 0.3995  | -0.011 | [-0.04,0.01]  | 0.3967  |
| Other Activity            | 0.202           | [0.14,0.26]   | 0.0000  | 0.202  | [0.14,0.26]   | 0.0000  | 0.203       | [0.14,0.26]   | 0.0000  | 0.209  | [0.15,0.27]   | 0.0000  | 0.210  | [0.15,0.27]   | 0.0000  | 0.210  | [0.15,0.27]   | 0.0000  |
| Social Programme          | -0.000          | [-0.03,0.02]  | 0.9699  | -0.002 | [-0.03,0.02]  | 0.8502  | -0.001      | [-0.03,0.02]  | 0.9177  | -0.004 | [-0.03,0.02]  | 0.7262  | -0.004 | [-0.03,0.02]  | 0.7216  | -0.003 | [-0.03,0.02]  | 0.7851  |
| Chronically Ill           | 0.320           | [0.30,0.35]   | 0.0000  | 0.320  | [0.30,0.35]   | 0.0000  | 0.320       | [0.29,0.34]   | 0.0000  | 0.316  | [0.29,0.34]   | 0.0000  | 0.316  | [0.29,0.34]   | 0.0000  | 0.315  | [0.29,0.34]   | 0.0000  |
| Victim of Violence        | 0.605           | [0.55,0.65]   | 0.0000  | 0.606  | [0.56,0.66]   | 0.0000  | 0.607       | [0.56,0.66]   | 0.0000  | 0.626  | [0.58,0.68]   | 0.0000  | 0.626  | [0.58,0.68]   | 0.0000  | 0.627  | [0.58,0.68]   | 0.0000  |
| Limitations in Activities | 0.242           | [0.23,0.26]   | 0.0000  | 0.242  | [0.23,0.26]   | 0.0000  | 0.241       | [0.23,0.26]   | 0.0000  | 0.231  | [0.21,0.25]   | 0.0000  | 0.231  | [0.21,0.25]   | 0.0000  | 0.230  | [0.21,0.25]   | 0.0000  |
| Drinks few times a year   | 0.060           | [0.04,0.08]   | 0.0000  | 0.060  | [0.04,0.08]   | 0.0000  | 0.060       | [0.04,0.08]   | 0.0000  | 0.059  | [0.04,0.08]   | 0.0000  | 0.059  | [0.04,0.08]   | 0.0000  | 0.059  | [0.04,0.08]   | 0.0000  |
| Drinks few times a month  | 0.041           | [0.01,0.07]   | 0.0121  | 0.042  | [0.01,0.07]   | 0.0101  | 0.043       | [0.01,0.08]   | 0.0078  | 0.041  | [0.01,0.07]   | 0.0114  | 0.041  | [0.01,0.07]   | 0.0105  | 0.042  | [0.01,0.07]   | 0.0097  |
| Drinks Weekly/Daily       | 0.146           | [0.11,0.18]   | 0.0000  | 0.148  | [0.11,0.19]   | 0.0000  | 0.149       | [0.11,0.19]   | 0.0000  | 0.153  | [0.11,0.19]   | 0.0000  | 0.154  | [0.12,0.19]   | 0.0000  | 0.154  | [0.12,0.19]   | 0.0000  |
| Has Health Insurance      | -0.012          | [-0.04,0.01]  | 0.3438  | -0.012 | [-0.04,0.01]  | 0.3286  | -0.013      | [-0.04,0.01]  | 0.3063  | -0.004 | [-0.03,0.02]  | 0.7535  | -0.005 | [-0.03,0.02]  | 0.6990  | -0.005 | [-0.03,0.02]  | 0.6843  |
| Hospitals/Pop             | -0.005          | [-0.02,0.01]  | 0.4552  | -0.005 | [-0.02,0.01]  | 0.4578  | -0.005      | [-0.02,0.01]  | 0.4377  | -0.028 | [-0.10,0.04]  | 0.4228  | -0.027 | [-0.09,0.04]  | 0.4331  | -0.027 | [-0.09,0.04]  | 0.4357  |
| Mean Wealth               | 0.037           | [-0.01,0.09]  | 0.1340  | 0.032  | [-0.02,0.08]  | 0.1975  | 0.030       | [-0.02,0.08]  | 0.2351  | 0.061  | [-0.11,0.23]  | 0.4845  | 0.061  | [-0.11,0.23]  | 0.4878  | 0.060  | [-0.11,0.23]  | 0.4894  |
| Constant                  | -1.676          | [-2.17,-1.18] | 0.0000  | -1.586 | [-2.08,-1.09] | 0.0000  | -1.460      | [-1.96,-0.96] | 0.0000  | -1.965 | [-3.65,-0.28] | 0.0223  | -1.908 | [-3.58,-0.23] | 0.0256  | -1.839 | [-3.51,-0.17] | 0.0311  |
| Obs                       | 44,324          |               |         | 44,324 |               |         | 44,324      |               |         | 44,324 |               |         | 44,324 |               |         | 44,324 |               |         |

For models 1-3 the second level is the municipality. For models 4-6 the second level is the state.

### ROBUSTNESS CHECK 1 – Multilevel Poisson model for depressive symptoms

## 2) Alternative measures of absolute standards of living

2.a) Here we replace our absolute wealth indicator with a dichotomous variable for absolute standard of living, which identifies respondents who had to borrow, sell or pawn any of their assets to be able to pay for medical care – taken to denote a condition of (absolute) material hardship.

|                           | MUNICIPAL LEVEL |               |         |        |               |         |        |               |         | STATE LEVEL |               |         |        |               |         |        |               |         |
|---------------------------|-----------------|---------------|---------|--------|---------------|---------|--------|---------------|---------|-------------|---------------|---------|--------|---------------|---------|--------|---------------|---------|
|                           | (1)             |               |         | (2)    |               |         | (3)    |               |         | (4)         |               |         | (5)    |               |         | (6)    |               |         |
|                           | Beta            | 95% CI        | P-Value | Beta   | 95% CI        | P-Value | Beta   | 95% CI        | P-Value | Beta        | 95% CI        | P-Value | Beta   | 95% CI        | P-Value | Beta   | 95% CI        | P-Value |
| Sold to pay for care      | 0.741           | [0.44,1.04]   | 0.0000  | 0.731  | [0.43,1.03]   | 0.0000  | 0.730  | [0.43,1.03]   | 0.0000  | 0.762       | [0.46,1.06]   | 0.0000  | 0.754  | [0.45,1.05]   | 0.0000  | 0.769  | [0.47,1.07]   | 0.0000  |
| Pawned to pay for care    | 1.109           | [0.88,1.34]   | 0.0000  | 1.096  | [0.86,1.33]   | 0.0000  | 1.085  | [0.85,1.32]   | 0.0000  | 1.110       | [0.88,1.34]   | 0.0000  | 1.093  | [0.86,1.33]   | 0.0000  | 1.070  | [0.84,1.30]   | 0.0000  |
| Borrowed to pay for care  | 0.981           | [0.82,1.14]   | 0.0000  | 0.968  | [0.81,1.13]   | 0.0000  | 0.963  | [0.80,1.12]   | 0.0000  | 1.028       | [0.87,1.19]   | 0.0000  | 1.024  | [0.86,1.18]   | 0.0000  | 1.062  | [0.90,1.22]   | 0.0000  |
| Relative Deprivation      | 0.278           | [0.23,0.33]   | 0.0000  | 0.163  | [0.10,0.23]   | 0.0000  | 0.148  | [0.08,0.21]   | 0.0000  | 0.264       | [0.22,0.31]   | 0.0000  | 0.160  | [0.10,0.22]   | 0.0000  | 0.144  | [0.08,0.20]   | 0.0000  |
| Relative Affluence        |                 |               |         | -0.202 | [-0.27,-0.13] | 0.0000  | -0.497 | [-0.66,-0.34] | 0.0000  |             |               |         | -0.191 | [-0.26,-0.12] | 0.0000  | -0.513 | [-0.69,-0.33] | 0.0000  |
| Gini                      | -0.891          | [-4.18,2.39]  | 0.5948  | -0.118 | [-3.41,3.18]  | 0.9441  | -1.991 | [-5.41,1.43]  | 0.2538  | 2.413       | [-3.66,8.49]  | 0.4362  | 2.724  | [-2.32,7.77]  | 0.2901  | 0.967  | [-2.20,4.14]  | 0.5498  |
| Relative Affluence*Gini   |                 |               |         |        |               |         | 1.884  | [0.97,2.80]   | 0.0001  |             |               |         |        |               |         | 1.709  | [0.82,2.60]   | 0.0002  |
| Household Size            | 0.026           | [0.00,0.05]   | 0.0382  | 0.029  | [0.00,0.05]   | 0.0223  | 0.029  | [0.00,0.05]   | 0.0200  | 0.020       | [-0.00,0.04]  | 0.1154  | 0.024  | [-0.00,0.05]  | 0.0559  | 0.029  | [0.00,0.05]   | 0.0201  |
| Female                    | 1.641           | [1.52,1.76]   | 0.0000  | 1.660  | [1.54,1.78]   | 0.0000  | 1.661  | [1.54,1.78]   | 0.0000  | 1.637       | [1.52,1.75]   | 0.0000  | 1.656  | [1.54,1.77]   | 0.0000  | 1.654  | [1.54,1.77]   | 0.0000  |
| Age                       | 0.111           | [0.10,0.13]   | 0.0000  | 0.113  | [0.10,0.13]   | 0.0000  | 0.114  | [0.10,0.13]   | 0.0000  | 0.111       | [0.10,0.13]   | 0.0000  | 0.113  | [0.10,0.13]   | 0.0000  | 0.112  | [0.10,0.13]   | 0.0000  |
| Age 2                     | -0.001          | [-0.00,-0.00] | 0.0000  | -0.001 | [-0.00,-0.00] | 0.0000  | -0.001 | [-0.00,-0.00] | 0.0000  | -0.001      | [-0.00,-0.00] | 0.0000  | -0.001 | [-0.00,-0.00] | 0.0000  | -0.001 | [-0.00,-0.00] | 0.0000  |
| Married                   | -0.412          | [-0.50,-0.32] | 0.0000  | -0.399 | [-0.49,-0.31] | 0.0000  | -0.395 | [-0.49,-0.30] | 0.0000  | -0.410      | [-0.50,-0.32] | 0.0000  | -0.393 | [-0.48,-0.30] | 0.0000  | -0.367 | [-0.46,-0.27] | 0.0000  |
| No education / Primary    | -0.434          | [-0.55,-0.32] | 0.0000  | -0.410 | [-0.52,-0.30] | 0.0000  | -0.411 | [-0.52,-0.30] | 0.0000  | -0.454      | [-0.57,-0.34] | 0.0000  | -0.432 | [-0.54,-0.32] | 0.0000  | -0.445 | [-0.56,-0.33] | 0.0000  |
| Secondary                 | -0.997          | [-1.13,-0.87] | 0.0000  | -0.906 | [-1.04,-0.77] | 0.0000  | -0.887 | [-1.02,-0.75] | 0.0000  | -1.060      | [-1.18,-0.94] | 0.0000  | -0.974 | [-1.10,-0.85] | 0.0000  | -0.984 | [-1.11,-0.86] | 0.0000  |
| Not Employed              | 0.559           | [0.34,0.78]   | 0.0000  | 0.559  | [0.34,0.78]   | 0.0000  | 0.558  | [0.34,0.78]   | 0.0000  | 0.611       | [0.39,0.83]   | 0.0000  | 0.613  | [0.39,0.83]   | 0.0000  | 0.618  | [0.40,0.84]   | 0.0000  |
| Retired                   | -0.122          | [-0.36,0.12]  | 0.3232  | -0.105 | [-0.35,0.14]  | 0.3968  | -0.103 | [-0.35,0.14]  | 0.4039  | -0.135      | [-0.38,0.11]  | 0.2791  | -0.120 | [-0.36,0.12]  | 0.3370  | -0.145 | [-0.39,0.10]  | 0.2449  |
| Student                   | 0.401           | [0.08,0.73]   | 0.0156  | 0.431  | [0.11,0.76]   | 0.0095  | 0.445  | [0.12,0.77]   | 0.0073  | 0.407       | [0.08,0.73]   | 0.0149  | 0.439  | [0.11,0.77]   | 0.0087  | 0.452  | [0.12,0.78]   | 0.0070  |
| House Work                | -0.021          | [-0.14,0.10]  | 0.7303  | -0.032 | [-0.15,0.09]  | 0.5944  | -0.032 | [-0.15,0.09]  | 0.5916  | -0.020      | [-0.14,0.10]  | 0.7357  | -0.031 | [-0.15,0.09]  | 0.6107  | -0.035 | [-0.15,0.08]  | 0.5613  |
| Other Act                 | 0.505           | [0.23,0.78]   | 0.0003  | 0.506  | [0.23,0.78]   | 0.0003  | 0.506  | [0.23,0.78]   | 0.0003  | 0.523       | [0.25,0.80]   | 0.0002  | 0.524  | [0.25,0.80]   | 0.0002  | 0.524  | [0.25,0.80]   | 0.0002  |
| Social Programme          | 0.044           | [-0.07,0.16]  | 0.4629  | 0.018  | [-0.10,0.14]  | 0.7671  | 0.026  | [-0.09,0.14]  | 0.6665  | 0.074       | [-0.04,0.19]  | 0.2020  | 0.050  | [-0.06,0.16]  | 0.3868  | 0.068  | [-0.05,0.18]  | 0.2382  |
| Chronic Health Problem    | 1.106           | [0.98,1.23]   | 0.0000  | 1.109  | [0.98,1.24]   | 0.0000  | 1.106  | [0.98,1.23]   | 0.0000  | 1.102       | [0.97,1.23]   | 0.0000  | 1.109  | [0.98,1.24]   | 0.0000  | 1.129  | [1.00,1.26]   | 0.0000  |
| Victim of Violence        | 2.348           | [2.06,2.64]   | 0.0000  | 2.359  | [2.07,2.65]   | 0.0000  | 2.360  | [2.07,2.65]   | 0.0000  | 2.388       | [2.09,2.68]   | 0.0000  | 2.399  | [2.11,2.69]   | 0.0000  | 2.427  | [2.13,2.72]   | 0.0000  |
| Limitations in Activities | 1.063           | [0.97,1.16]   | 0.0000  | 1.060  | [0.97,1.15]   | 0.0000  | 1.056  | [0.96,1.15]   | 0.0000  | 1.047       | [0.95,1.14]   | 0.0000  | 1.047  | [0.95,1.14]   | 0.0000  | 1.063  | [0.97,1.16]   | 0.0000  |
| Drinks Yearly             | 0.150           | [0.04,0.26]   | 0.0058  | 0.158  | [0.05,0.26]   | 0.0036  | 0.157  | [0.05,0.26]   | 0.0038  | 0.155       | [0.05,0.26]   | 0.0042  | 0.163  | [0.06,0.27]   | 0.0026  | 0.163  | [0.06,0.27]   | 0.0026  |
| Drinks Monthly            | 0.166           | [0.04,0.30]   | 0.0122  | 0.180  | [0.05,0.31]   | 0.0068  | 0.185  | [0.06,0.32]   | 0.0052  | 0.154       | [0.02,0.28]   | 0.0208  | 0.165  | [0.04,0.30]   | 0.0129  | 0.163  | [0.03,0.29]   | 0.0145  |
| Drinks Weekly/Daily       | 0.391           | [0.23,0.55]   | 0.0000  | 0.413  | [0.25,0.57]   | 0.0000  | 0.416  | [0.26,0.57]   | 0.0000  | 0.399       | [0.24,0.56]   | 0.0000  | 0.417  | [0.26,0.58]   | 0.0000  | 0.423  | [0.26,0.58]   | 0.0000  |
| Has Insurance             | -0.032          | [-0.14,0.08]  | 0.5630  | -0.038 | [-0.15,0.07]  | 0.4880  | -0.042 | [-0.15,0.07]  | 0.4481  | -0.020      | [-0.13,0.09]  | 0.7215  | -0.028 | [-0.14,0.08]  | 0.6053  | -0.042 | [-0.15,0.07]  | 0.4442  |
| Hospitals/Pop             | -0.015          | [-0.05,0.02]  | 0.4092  | -0.016 | [-0.05,0.02]  | 0.3994  | -0.017 | [-0.05,0.02]  | 0.3563  | -0.093      | [-0.21,0.02]  | 0.1184  | -0.089 | [-0.19,0.01]  | 0.0724  | -0.089 | [-0.15,-0.03] | 0.0033  |
| Mean Wealth               | 0.005           | [-0.13,0.14]  | 0.9436  | 0.026  | [-0.11,0.16]  | 0.7010  | 0.016  | [-0.11,0.15]  | 0.8058  | 0.155       | [-0.13,0.44]  | 0.2938  | 0.168  | [-0.07,0.41]  | 0.1701  | 0.160  | [0.01,0.31]   | 0.0312  |
| Constant                  | -0.008          | [-1.36,1.35]  | 0.9910  | -0.099 | [-1.45,1.26]  | 0.8865  | 0.244  | [-1.12,1.61]  | 0.7262  | -1.367      | [-4.22,1.48]  | 0.3469  | -1.368 | [-3.74,1.01]  | 0.2588  | -0.967 | [-2.45,0.51]  | 0.2002  |
| Obs                       | 44,324          |               |         | 44,324 |               |         | 44,324 |               |         | 44,324      |               |         | 44,324 |               |         | 44,324 |               |         |
| Overall-R2                | 0.0926          |               |         | 0.0933 |               |         | 0.0936 |               |         | 0.0933      |               |         | 0.0940 |               |         | 0.0943 |               |         |
| Between-R2                | 0.1243          |               |         | 0.1242 |               |         | 0.1246 |               |         | 0.4054      |               |         | 0.4111 |               |         | 0.4399 |               |         |
| Within-R2                 | 0.0910          |               |         | 0.0916 |               |         | 0.0919 |               |         | 0.0916      |               |         | 0.0922 |               |         | 0.0924 |               |         |

For models 1-3 the second level is the municipality. For models 4-6 the second level is the state.

**ROBUSTNESS CHECK 2 – Multilevel linear regression models with an alternative absolute standards of living variable**

2.b) In this additional robustness check for an alternative measure of absolute standards of living, we estimate our models using a continuous measure of absolute wealth – specifically, using the computed PCA asset index in its continuous form rather than using quartiles derived from it.

|                           | MUNICIPAL LEVEL |               |         |        |               |         |        |               |         | STATE LEVEL |               |         |        |               |         |        |               |         |
|---------------------------|-----------------|---------------|---------|--------|---------------|---------|--------|---------------|---------|-------------|---------------|---------|--------|---------------|---------|--------|---------------|---------|
|                           | (1)             |               |         | (2)    |               |         | (3)    |               |         | (4)         |               |         | (5)    |               |         | (6)    |               |         |
|                           | Beta            | 95% CI        | P-Value | Beta   | 95% CI        | P-Value | Beta   | 95% CI        | P-Value | Beta        | 95% CI        | P-Value | Beta   | 95% CI        | P-Value | Beta   | 95% CI        | P-Value |
| Asset index               | -0.060          | [-0.10,-0.02] | 0.0063  | -0.045 | [-0.09,-0.00] | 0.0446  | -0.051 | [-0.09,-0.01] | 0.0230  | -0.070      | [-0.11,-0.03] | 0.0010  | -0.057 | [-0.10,-0.01] | 0.0078  | -0.061 | [-0.10,-0.02] | 0.0046  |
| Rel Deprivation           | 0.264           | [0.21,0.32]   | 0.0000  | 0.147  | [0.08,0.21]   | 0.0000  | 0.128  | [0.06,0.20]   | 0.0002  | 0.248       | [0.20,0.30]   | 0.0000  | 0.145  | [0.08,0.21]   | 0.0000  | 0.134  | [0.07,0.20]   | 0.0000  |
| Rel Affluence             |                 |               |         | -0.218 | [-0.29,-0.14] | 0.0000  | -0.554 | [-0.71,-0.39] | 0.0000  |             |               |         | -0.203 | [-0.27,-0.13] | 0.0000  | -0.533 | [-0.71,-0.35] | 0.0000  |
| Gini                      | -0.858          | [-4.23,2.51]  | 0.6176  | -0.023 | [-3.40,3.36]  | 0.9895  | -2.174 | [-5.68,1.33]  | 0.2238  | 2.117       | [-5.00,9.23]  | 0.5600  | 2.479  | [-4.31,9.27]  | 0.4741  | 0.791  | [-5.44,7.02]  | 0.8034  |
| Rel Affluence*Gini        |                 |               |         |        |               |         | 2.157  | [1.24,3.08]   | 0.0000  |             |               |         |        |               |         | 1.777  | [0.88,2.67]   | 0.0001  |
| N people in HH            | 0.002           | [-0.03,0.04]  | 0.8902  | 0.014  | [-0.02,0.05]  | 0.4309  | 0.011  | [-0.02,0.05]  | 0.5324  | -0.010      | [-0.04,0.02]  | 0.5505  | 0.001  | [-0.03,0.04]  | 0.9696  | -0.001 | [-0.04,0.03]  | 0.9420  |
| Female                    | 1.642           | [1.53,1.76]   | 0.0000  | 1.664  | [1.55,1.78]   | 0.0000  | 1.664  | [1.55,1.78]   | 0.0000  | 1.645       | [1.53,1.76]   | 0.0000  | 1.664  | [1.55,1.78]   | 0.0000  | 1.662  | [1.55,1.78]   | 0.0000  |
| Age                       | 0.111           | [0.10,0.13]   | 0.0000  | 0.113  | [0.10,0.13]   | 0.0000  | 0.114  | [0.10,0.13]   | 0.0000  | 0.112       | [0.10,0.13]   | 0.0000  | 0.114  | [0.10,0.13]   | 0.0000  | 0.114  | [0.10,0.13]   | 0.0000  |
| Age <sup>2</sup>          | -0.001          | [-0.00,-0.00] | 0.0000  | -0.001 | [-0.00,-0.00] | 0.0000  | -0.001 | [-0.00,-0.00] | 0.0000  | -0.001      | [-0.00,-0.00] | 0.0000  | -0.001 | [-0.00,-0.00] | 0.0000  | -0.001 | [-0.00,-0.00] | 0.0000  |
| Married                   | -0.437          | [-0.53,-0.34] | 0.0000  | -0.417 | [-0.51,-0.32] | 0.0000  | -0.414 | [-0.51,-0.32] | 0.0000  | -0.438      | [-0.53,-0.34] | 0.0000  | -0.419 | [-0.51,-0.33] | 0.0000  | -0.416 | [-0.51,-0.32] | 0.0000  |
| No education / Primary    | -0.413          | [-0.53,-0.30] | 0.0000  | -0.388 | [-0.50,-0.27] | 0.0000  | -0.390 | [-0.50,-0.28] | 0.0000  | -0.426      | [-0.54,-0.31] | 0.0000  | -0.403 | [-0.52,-0.29] | 0.0000  | -0.408 | [-0.52,-0.30] | 0.0000  |
| Secondary                 | -0.995          | [-1.12,-0.87] | 0.0000  | -0.900 | [-1.03,-0.77] | 0.0000  | -0.877 | [-1.01,-0.74] | 0.0000  | -1.045      | [-1.17,-0.92] | 0.0000  | -0.956 | [-1.09,-0.83] | 0.0000  | -0.950 | [-1.08,-0.82] | 0.0000  |
| Not Employed              | 0.584           | [0.37,0.80]   | 0.0000  | 0.584  | [0.37,0.80]   | 0.0000  | 0.583  | [0.36,0.80]   | 0.0000  | 0.639       | [0.42,0.86]   | 0.0000  | 0.640  | [0.42,0.86]   | 0.0000  | 0.638  | [0.42,0.86]   | 0.0000  |
| Retired                   | -0.120          | [-0.36,0.12]  | 0.3325  | -0.105 | [-0.35,0.14]  | 0.3971  | -0.102 | [-0.35,0.14]  | 0.4113  | -0.128      | [-0.37,0.12]  | 0.3077  | -0.112 | [-0.36,0.13]  | 0.3696  | -0.119 | [-0.36,0.13]  | 0.3405  |
| Student                   | 0.390           | [0.06,0.72]   | 0.0191  | 0.423  | [0.10,0.75]   | 0.0110  | 0.439  | [0.11,0.77]   | 0.0083  | 0.398       | [0.07,0.73]   | 0.0177  | 0.431  | [0.10,0.76]   | 0.0101  | 0.436  | [0.11,0.77]   | 0.0093  |
| House Work                | -0.020          | [-0.14,0.10]  | 0.7357  | -0.032 | [-0.15,0.09]  | 0.5931  | -0.033 | [-0.15,0.09]  | 0.5894  | -0.022      | [-0.14,0.10]  | 0.7120  | -0.032 | [-0.15,0.09]  | 0.5967  | -0.033 | [-0.15,0.09]  | 0.5862  |
| Other Activity            | 0.509           | [0.23,0.78]   | 0.0003  | 0.512  | [0.24,0.79]   | 0.0003  | 0.512  | [0.24,0.79]   | 0.0003  | 0.525       | [0.25,0.80]   | 0.0002  | 0.528  | [0.25,0.80]   | 0.0002  | 0.527  | [0.25,0.80]   | 0.0002  |
| Social Programme          | 0.035           | [-0.08,0.15]  | 0.5554  | 0.008  | [-0.11,0.13]  | 0.8883  | 0.017  | [-0.10,0.14]  | 0.7714  | 0.055       | [-0.06,0.17]  | 0.3471  | 0.032  | [-0.08,0.15]  | 0.5868  | 0.041  | [-0.07,0.16]  | 0.4827  |
| Chronically Ill           | 1.188           | [1.06,1.32]   | 0.0000  | 1.189  | [1.06,1.32]   | 0.0000  | 1.185  | [1.06,1.31]   | 0.0000  | 1.186       | [1.06,1.31]   | 0.0000  | 1.188  | [1.06,1.32]   | 0.0000  | 1.185  | [1.06,1.31]   | 0.0000  |
| Victim of Violence        | 2.380           | [2.09,2.67]   | 0.0000  | 2.391  | [2.10,2.68]   | 0.0000  | 2.393  | [2.10,2.68]   | 0.0000  | 2.422       | [2.13,2.72]   | 0.0000  | 2.429  | [2.13,2.72]   | 0.0000  | 2.436  | [2.14,2.73]   | 0.0000  |
| Limitations in Activities | 1.107           | [1.01,1.20]   | 0.0000  | 1.103  | [1.01,1.20]   | 0.0000  | 1.099  | [1.01,1.19]   | 0.0000  | 1.092       | [1.00,1.19]   | 0.0000  | 1.088  | [0.99,1.18]   | 0.0000  | 1.086  | [0.99,1.18]   | 0.0000  |
| Drinks few times a year   | 0.167           | [0.06,0.27]   | 0.0022  | 0.175  | [0.07,0.28]   | 0.0013  | 0.174  | [0.07,0.28]   | 0.0014  | 0.174       | [0.07,0.28]   | 0.0014  | 0.182  | [0.08,0.29]   | 0.0008  | 0.181  | [0.07,0.29]   | 0.0009  |
| Drinks few times a month  | 0.171           | [0.04,0.30]   | 0.0102  | 0.185  | [0.05,0.32]   | 0.0054  | 0.192  | [0.06,0.32]   | 0.0040  | 0.163       | [0.03,0.29]   | 0.0144  | 0.176  | [0.04,0.31]   | 0.0084  | 0.179  | [0.05,0.31]   | 0.0074  |
| Drinks Weekly/Daily       | 0.389           | [0.23,0.55]   | 0.0000  | 0.411  | [0.25,0.57]   | 0.0000  | 0.415  | [0.26,0.57]   | 0.0000  | 0.400       | [0.24,0.56]   | 0.0000  | 0.418  | [0.26,0.58]   | 0.0000  | 0.421  | [0.26,0.58]   | 0.0000  |
| Has Health Insurance      | -0.034          | [-0.14,0.07]  | 0.5415  | -0.040 | [-0.15,0.07]  | 0.4703  | -0.044 | [-0.15,0.06]  | 0.4234  | -0.020      | [-0.13,0.09]  | 0.7119  | -0.027 | [-0.14,0.08]  | 0.6211  | -0.030 | [-0.14,0.08]  | 0.5820  |
| Hospitals/Pop             | -0.015          | [-0.05,0.02]  | 0.4177  | -0.016 | [-0.05,0.02]  | 0.4088  | -0.017 | [-0.05,0.02]  | 0.3601  | -0.086      | [-0.22,0.05]  | 0.2209  | -0.082 | [-0.21,0.05]  | 0.2191  | -0.083 | [-0.20,0.04]  | 0.1699  |
| Mean Wealth               | 0.017           | [-0.12,0.15]  | 0.8038  | 0.036  | [-0.10,0.17]  | 0.6041  | 0.026  | [-0.11,0.16]  | 0.7006  | 0.144       | [-0.20,0.48]  | 0.4058  | 0.156  | [-0.17,0.48]  | 0.3425  | 0.153  | [-0.14,0.45]  | 0.3070  |
| Constant                  | 0.276           | [-1.12,1.67]  | 0.6978  | 0.131  | [-1.26,1.52]  | 0.8542  | 0.540  | [-0.86,1.95]  | 0.4508  | -0.863      | [-4.19,2.47]  | 0.6118  | -0.921 | [-4.10,2.26]  | 0.5699  | -0.564 | [-3.46,2.34]  | 0.7030  |
| Obs                       | 44,324          |               |         | 44,324 |               |         | 44,324 |               |         | 44,324      |               |         | 44,324 |               |         | 44,324 |               |         |
| Overall-R2                | 0.0863          |               |         | 0.0871 |               |         | 0.0875 |               |         | 0.0869      |               |         | 0.0877 |               |         | 0.0880 |               |         |
| Between-R2                | 0.0914          |               |         | 0.0902 |               |         | 0.0908 |               |         | 0.3129      |               |         | 0.3176 |               |         | 0.3294 |               |         |
| Within-R2                 | 0.0854          |               |         | 0.0861 |               |         | 0.0866 |               |         | 0.0856      |               |         | 0.0862 |               |         | 0.0865 |               |         |

For models 1-3 the second level is the municipality. For models 4-6 the second level is the state.

**ROBUSTNESS CHECK 6 – Multilevel models for depressive symptoms using a continuous measure of absolute wealth**

### 3) Alternative measures of relative deprivation and relative affluence

We use alternative measures of relative deprivation and relative affluence, based on non-linear indices as well as more refined reference groups (municipality + gender and municipality + employment status).

#### 3.a) Measures of relative deprivation and relative affluence based on Municipality + Gender reference groups

|                           | MUNICIPAL LEVEL |               |         |        |               |         | STATE LEVEL |               |         |        |               |         |        |               |         |             |               |         |
|---------------------------|-----------------|---------------|---------|--------|---------------|---------|-------------|---------------|---------|--------|---------------|---------|--------|---------------|---------|-------------|---------------|---------|
|                           | Beta            | (1)<br>95% CI | P-Value | Beta   | (2)<br>95% CI | P-Value | Beta        | (3)<br>95% CI | P-Value | Beta   | (4)<br>95% CI | P-Value | Beta   | (5)<br>95% CI | P-Value | Beta        | (6)<br>95% CI | P-Value |
| Poorest Quartile          | 0.688           | [0.43,0.94]   | 0.0000  | 0.526  | [0.23,0.82]   | 0.0006  | 0.485       | [0.18,0.79]   | 0.0016  | 0.566  | [0.37,0.76]   | 0.0000  | 0.464  | [0.25,0.68]   | 0.0000  | 0.445       | [0.24,0.66]   | 0.0000  |
| 2 <sup>nd</sup> Quartile  | 0.655           | [0.48,0.82]   | 0.0000  | 0.528  | [0.32,0.74]   | 0.0000  | 0.435       | [0.22,0.65]   | 0.0001  | 0.622  | [0.47,0.77]   | 0.0000  | 0.527  | [0.36,0.69]   | 0.0000  | 0.470       | [0.30,0.64]   | 0.0000  |
| 3 <sup>rd</sup> Quartile  | 0.360           | [0.23,0.49]   | 0.0000  | 0.272  | [0.12,0.43]   | 0.0007  | 0.189       | [0.02,0.35]   | 0.0249  | 0.353  | [0.23,0.48]   | 0.0000  | 0.280  | [0.14,0.42]   | 0.0001  | 0.232       | [0.09,0.38]   | 0.0017  |
| Rel Deprivation           | 0.133           | [0.05,0.21]   | 0.0013  | 0.116  | [0.03,0.20]   | 0.0059  | 0.095       | [0.01,0.18]   | 0.0268  | 0.162  | [0.10,0.23]   | 0.0000  | 0.131  | [0.06,0.20]   | 0.0002  | 0.113       | [0.04,0.18]   | 0.0014  |
| Rel Affluence             |                 |               |         | -0.095 | [-0.19,-0.00] | 0.0396  | -0.373      | [-0.57,-0.18] | 0.0002  |        |               |         | -0.094 | [-0.17,-0.01] | 0.0208  | -0.381      | [-0.58,-0.18] | 0.0002  |
| Gini                      | -0.741          | [-4.10,2.62]  | 0.6659  | -0.438 | [-3.81,2.94]  | 0.7991  | -1.910      | [-5.41,1.59]  | 0.2850  | 2.279  | [-4.60,9.16]  | 0.5162  | 2.361  | [-3.76,8.48]  | 0.4493  | 0.941       | [-3.08,4.96]  | 0.6467  |
| Rel Affluence*Gini        |                 |               |         |        |               |         | 1.632       | [0.60,2.66]   | 0.0019  |        |               |         |        |               | 1.453   | [0.51,2.40] | 0.0025        |         |
| N people in HH            | 0.038           | [0.01,0.06]   | 0.0025  | 0.039  | [0.01,0.06]   | 0.0020  | 0.039       | [0.01,0.06]   | 0.0019  | 0.031  | [0.01,0.06]   | 0.0147  | 0.032  | [0.01,0.06]   | 0.0102  | 0.036       | [0.01,0.06]   | 0.0049  |
| Female                    | 1.662           | [1.55,1.78]   | 0.0000  | 1.663  | [1.55,1.78]   | 0.0000  | 1.661       | [1.54,1.78]   | 0.0000  | 1.679  | [1.56,1.80]   | 0.0000  | 1.678  | [1.56,1.79]   | 0.0000  | 1.675       | [1.56,1.79]   | 0.0000  |
| Age                       | 0.112           | [0.10,0.13]   | 0.0000  | 0.113  | [0.10,0.13]   | 0.0000  | 0.113       | [0.10,0.13]   | 0.0000  | 0.114  | [0.10,0.13]   | 0.0000  | 0.114  | [0.10,0.13]   | 0.0000  | 0.113       | [0.10,0.13]   | 0.0000  |
| Age <sup>2</sup>          | -0.001          | [-0.00,-0.00] | 0.0000  | -0.001 | [-0.00,-0.00] | 0.0000  | -0.001      | [-0.00,-0.00] | 0.0000  | -0.001 | [-0.00,-0.00] | 0.0000  | -0.001 | [-0.00,-0.00] | 0.0000  | -0.001      | [-0.00,-0.00] | 0.0000  |
| Married                   | -0.397          | [-0.49,-0.31] | 0.0000  | -0.394 | [-0.49,-0.30] | 0.0000  | -0.392      | [-0.48,-0.30] | 0.0000  | -0.395 | [-0.49,-0.30] | 0.0000  | -0.389 | [-0.48,-0.30] | 0.0000  | -0.373      | [-0.46,-0.28] | 0.0000  |
| No education / Primary    | -0.385          | [-0.50,-0.27] | 0.0000  | -0.381 | [-0.49,-0.27] | 0.0000  | -0.382      | [-0.50,-0.27] | 0.0000  | -0.380 | [-0.49,-0.27] | 0.0000  | -0.380 | [-0.49,-0.27] | 0.0000  | -0.389      | [-0.50,-0.28] | 0.0000  |
| Secondary                 | -0.889          | [-1.02,-0.76] | 0.0000  | -0.872 | [-1.01,-0.74] | 0.0000  | -0.866      | [-1.00,-0.73] | 0.0000  | -0.904 | [-1.04,-0.77] | 0.0000  | -0.893 | [-1.03,-0.76] | 0.0000  | -0.905      | [-1.04,-0.77] | 0.0000  |
| Not Employed              | 0.580           | [0.36,0.80]   | 0.0000  | 0.582  | [0.36,0.80]   | 0.0000  | 0.582       | [0.36,0.80]   | 0.0000  | 0.631  | [0.41,0.85]   | 0.0000  | 0.635  | [0.42,0.85]   | 0.0000  | 0.639       | [0.42,0.86]   | 0.0000  |
| Retired                   | -0.118          | [-0.36,0.13]  | 0.3412  | -0.114 | [-0.36,0.13]  | 0.3593  | -0.113      | [-0.36,0.13]  | 0.3609  | -0.114 | [-0.36,0.13]  | 0.3599  | -0.113 | [-0.36,0.13]  | 0.3647  | -0.130      | [-0.37,0.12]  | 0.2996  |
| Student                   | 0.433           | [0.11,0.76]   | 0.0093  | 0.438  | [0.11,0.76]   | 0.0085  | 0.446       | [0.12,0.77]   | 0.0074  | 0.453  | [0.12,0.78]   | 0.0069  | 0.458  | [0.13,0.79]   | 0.0063  | 0.465       | [0.14,0.79]   | 0.0057  |
| House Work                | -0.034          | [-0.15,0.09]  | 0.5761  | -0.037 | [-0.16,0.08]  | 0.5476  | -0.036      | [-0.15,0.08]  | 0.5559  | -0.043 | [-0.16,0.08]  | 0.4800  | -0.044 | [-0.16,0.08]  | 0.4660  | -0.046      | [-0.17,0.07]  | 0.4486  |
| Other Activity            | 0.512           | [0.24,0.79]   | 0.0003  | 0.514  | [0.24,0.79]   | 0.0002  | 0.514       | [0.24,0.79]   | 0.0002  | 0.523  | [0.25,0.80]   | 0.0002  | 0.526  | [0.25,0.80]   | 0.0002  | 0.525       | [0.25,0.80]   | 0.0002  |
| Social Programme          | 0.005           | [-0.11,0.12]  | 0.9360  | 0.000  | [-0.12,0.12]  | 0.9935  | 0.006       | [-0.11,0.12]  | 0.9180  | 0.003  | [-0.11,0.12]  | 0.9661  | 0.003  | [-0.11,0.12]  | 0.9605  | 0.014       | [-0.10,0.13]  | 0.8136  |
| Chronically Ill           | 1.185           | [1.06,1.31]   | 0.0000  | 1.186  | [1.06,1.31]   | 0.0000  | 1.184       | [1.06,1.31]   | 0.0000  | 1.185  | [1.06,1.31]   | 0.0000  | 1.188  | [1.06,1.32]   | 0.0000  | 1.200       | [1.07,1.33]   | 0.0000  |
| Victim of Violence        | 2.385           | [2.09,2.68]   | 0.0000  | 2.388  | [2.10,2.68]   | 0.0000  | 2.390       | [2.10,2.68]   | 0.0000  | 2.435  | [2.14,2.73]   | 0.0000  | 2.438  | [2.14,2.73]   | 0.0000  | 2.455       | [2.16,2.75]   | 0.0000  |
| Limitations in Activities | 1.099           | [1.01,1.19]   | 0.0000  | 1.099  | [1.00,1.19]   | 0.0000  | 1.097       | [1.00,1.19]   | 0.0000  | 1.084  | [0.99,1.18]   | 0.0000  | 1.084  | [0.99,1.18]   | 0.0000  | 1.094       | [1.00,1.19]   | 0.0000  |
| Drinks few times a year   | 0.178           | [0.07,0.28]   | 0.0011  | 0.180  | [0.07,0.29]   | 0.0010  | 0.178       | [0.07,0.29]   | 0.0010  | 0.190  | [0.08,0.30]   | 0.0005  | 0.191  | [0.08,0.30]   | 0.0005  | 0.191       | [0.08,0.30]   | 0.0005  |
| Drinks few times a month  | 0.188           | [0.06,0.32]   | 0.0048  | 0.190  | [0.06,0.32]   | 0.0042  | 0.193       | [0.06,0.32]   | 0.0037  | 0.187  | [0.06,0.32]   | 0.0052  | 0.188  | [0.06,0.32]   | 0.0050  | 0.186       | [0.06,0.32]   | 0.0054  |
| Drinks Weekly/Daily       | 0.404           | [0.25,0.56]   | 0.0000  | 0.410  | [0.25,0.57]   | 0.0000  | 0.413       | [0.25,0.57]   | 0.0000  | 0.423  | [0.26,0.58]   | 0.0000  | 0.428  | [0.27,0.59]   | 0.0000  | 0.432       | [0.27,0.59]   | 0.0000  |
| Has Health Insurance      | -0.042          | [-0.15,0.07]  | 0.4439  | -0.043 | [-0.15,0.06]  | 0.4351  | -0.045      | [-0.15,0.06]  | 0.4096  | -0.030 | [-0.14,0.08]  | 0.5923  | -0.032 | [-0.14,0.08]  | 0.5592  | -0.041      | [-0.15,0.07]  | 0.4543  |
| Hospitals/Pop             | -0.018          | [-0.06,0.02]  | 0.3537  | -0.018 | [-0.06,0.02]  | 0.3542  | -0.019      | [-0.06,0.02]  | 0.3310  | -0.091 | [-0.22,0.04]  | 0.1780  | -0.089 | [-0.21,0.03]  | 0.1387  | -0.088      | [-0.16,-0.01] | 0.0239  |
| Mean Wealth               | 0.078           | [-0.06,0.22]  | 0.2713  | 0.068  | [-0.07,0.21]  | 0.3364  | 0.064       | [-0.07,0.20]  | 0.3643  | 0.179  | [-0.15,0.51]  | 0.2854  | 0.175  | [-0.12,0.47]  | 0.2400  | 0.170       | [-0.02,0.36]  | 0.0768  |
| Constant                  | -0.847          | [-2.27,0.58]  | 0.2450  | -0.658 | [-2.10,0.78]  | 0.3701  | -0.316      | [-1.77,1.14]  | 0.6706  | -1.883 | [-5.11,1.35]  | 0.2533  | -1.718 | [-4.60,1.16]  | 0.2428  | -1.349      | [-3.25,0.55]  | 0.1635  |
| Obs                       | 44,324          |               |         | 44,324 |               |         | 44,324      |               |         | 44,324 |               |         | 44,324 |               |         | 44,324      |               |         |
| Overall-R2                | 0.0875          |               |         | 0.0876 |               |         | 0.0878      |               |         | 0.0880 |               |         | 0.0882 |               |         | 0.0884      |               |         |
| Between-R2                | 0.0925          |               |         | 0.0931 |               |         | 0.0930      |               |         | 0.3154 |               |         | 0.3248 |               |         | 0.3471      |               |         |
| Within-R2                 | 0.0864          |               |         | 0.0865 |               |         | 0.0867      |               |         | 0.0867 |               |         | 0.0868 |               |         | 0.0869      |               |         |

For models 1-3 the second level is the municipality. For models 4-6 the second level is the state.

ROBUSTNESS CHECK 3.a – Multilevel linear regression models with Municipality + Gender reference groups

## 3.b) Measures of relative deprivation and relative affluence based on Municipality + Employment status reference groups

|                           | MUNICIPAL LEVEL |               |         |        |               |         |        |               |         | STATE LEVEL |               |         |        |               |         |             |               |         |
|---------------------------|-----------------|---------------|---------|--------|---------------|---------|--------|---------------|---------|-------------|---------------|---------|--------|---------------|---------|-------------|---------------|---------|
|                           | (1)             |               |         | (2)    |               |         | (3)    |               |         | (4)         |               |         | (5)    |               |         | (6)         |               |         |
|                           | Beta            | 95% CI        | P-Value | Beta   | 95% CI        | P-Value | Beta   | 95% CI        | P-Value | Beta        | 95% CI        | P-Value | Beta   | 95% CI        | P-Value | Beta        | 95% CI        | P-Value |
| Poorest Quartile          | 0.685           | [0.43,0.94]   | 0.0000  | 0.503  | [0.20,0.80]   | 0.0010  | 0.464  | [0.16,0.76]   | 0.0024  | 0.563       | [0.37,0.76]   | 0.0000  | 0.452  | [0.24,0.66]   | 0.0000  | 0.434       | [0.22,0.64]   | 0.0001  |
| 2nd Quartile              | 0.652           | [0.48,0.82]   | 0.0000  | 0.511  | [0.30,0.72]   | 0.0000  | 0.423  | [0.21,0.64]   | 0.0001  | 0.619       | [0.47,0.77]   | 0.0000  | 0.517  | [0.35,0.68]   | 0.0000  | 0.466       | [0.30,0.64]   | 0.0000  |
| 3rd Quartile              | 0.359           | [0.23,0.49]   | 0.0000  | 0.261  | [0.10,0.42]   | 0.0011  | 0.183  | [0.02,0.35]   | 0.0302  | 0.352       | [0.22,0.48]   | 0.0000  | 0.273  | [0.13,0.41]   | 0.0002  | 0.230       | [0.09,0.37]   | 0.0018  |
| Rel Deprivation           | 0.133           | [0.05,0.21]   | 0.0011  | 0.115  | [0.03,0.20]   | 0.0061  | 0.095  | [0.01,0.18]   | 0.0249  | 0.163       | [0.10,0.23]   | 0.0000  | 0.129  | [0.06,0.20]   | 0.0002  | 0.112       | [0.04,0.18]   | 0.0014  |
| Rel Affluence             |                 |               |         | -0.107 | [-0.20,-0.02] | 0.0213  | -0.368 | [-0.57,-0.17] | 0.0003  |             |               |         | -0.102 | [-0.18,-0.02] | 0.0125  | -0.351      | [-0.55,-0.15] | 0.0005  |
| Gini                      | -0.748          | [-4.11,2.61]  | 0.6627  | -0.409 | [-3.78,2.96]  | 0.8120  | -1.786 | [-5.29,1.71]  | 0.3172  | 2.282       | [-4.65,9.22]  | 0.5189  | 2.382  | [-4.22,8.98]  | 0.4794  | 1.139       | [-2.84,5.12]  | 0.5746  |
| Rel Affluence*Gini        |                 |               |         |        |               |         | 1.535  | [0.50,2.57]   | 0.0037  |             |               |         |        |               | 1.247   | [0.30,2.19] | 0.0097        |         |
| N people in HH            | 0.038           | [0.01,0.06]   | 0.0024  | 0.039  | [0.01,0.06]   | 0.0019  | 0.039  | [0.01,0.06]   | 0.0018  | 0.031       | [0.01,0.06]   | 0.0142  | 0.032  | [0.01,0.06]   | 0.0103  | 0.036       | [0.01,0.06]   | 0.0044  |
| Female                    | 1.664           | [1.55,1.78]   | 0.0000  | 1.668  | [1.55,1.79]   | 0.0000  | 1.668  | [1.55,1.79]   | 0.0000  | 1.681       | [1.56,1.80]   | 0.0000  | 1.683  | [1.57,1.80]   | 0.0000  | 1.681       | [1.56,1.80]   | 0.0000  |
| Age                       | 0.113           | [0.10,0.13]   | 0.0000  | 0.113  | [0.10,0.13]   | 0.0000  | 0.113  | [0.10,0.13]   | 0.0000  | 0.114       | [0.10,0.13]   | 0.0000  | 0.114  | [0.10,0.13]   | 0.0000  | 0.113       | [0.10,0.13]   | 0.0000  |
| Age <sup>2</sup>          | -0.001          | [-0.00,-0.00] | 0.0000  | -0.001 | [-0.00,-0.00] | 0.0000  | -0.001 | [-0.00,-0.00] | 0.0000  | -0.001      | [-0.00,-0.00] | 0.0000  | -0.001 | [-0.00,-0.00] | 0.0000  | -0.001      | [-0.00,-0.00] | 0.0000  |
| Married                   | -0.397          | [-0.49,-0.31] | 0.0000  | -0.394 | [-0.49,-0.30] | 0.0000  | -0.392 | [-0.48,-0.30] | 0.0000  | -0.395      | [-0.49,-0.30] | 0.0000  | -0.399 | [-0.48,-0.30] | 0.0000  | -0.372      | [-0.46,-0.28] | 0.0000  |
| No education / Primary    | -0.384          | [-0.50,-0.27] | 0.0000  | -0.380 | [-0.49,-0.27] | 0.0000  | -0.382 | [-0.49,-0.27] | 0.0000  | -0.380      | [-0.49,-0.27] | 0.0000  | -0.379 | [-0.49,-0.27] | 0.0000  | -0.388      | [-0.50,-0.27] | 0.0000  |
| Secondary                 | -0.887          | [-1.02,-0.75] | 0.0000  | -0.869 | [-1.00,-0.74] | 0.0000  | -0.864 | [-1.00,-0.73] | 0.0000  | -0.903      | [-1.04,-0.77] | 0.0000  | -0.890 | [-1.02,-0.76] | 0.0000  | -0.904      | [-1.04,-0.77] | 0.0000  |
| Not Employed              | 0.593           | [0.37,0.81]   | 0.0000  | 0.598  | [0.38,0.82]   | 0.0000  | 0.597  | [0.38,0.82]   | 0.0000  | 0.647       | [0.43,0.87]   | 0.0000  | 0.651  | [0.43,0.87]   | 0.0000  | 0.656       | [0.44,0.88]   | 0.0000  |
| Retired                   | -0.108          | [-0.35,0.14]  | 0.3854  | -0.098 | [-0.34,0.15]  | 0.4312  | -0.097 | [-0.34,0.15]  | 0.4359  | -0.102      | [-0.35,0.14]  | 0.4141  | -0.096 | [-0.34,0.15]  | 0.4429  | -0.113      | [-0.36,0.13]  | 0.3661  |
| Student                   | 0.443           | [0.12,0.77]   | 0.0079  | 0.455  | [0.13,0.78]   | 0.0064  | 0.464  | [0.14,0.79]   | 0.0054  | 0.465       | [0.14,0.79]   | 0.0056  | 0.475  | [0.15,0.80]   | 0.0047  | 0.482       | [0.15,0.81]   | 0.0041  |
| House Work                | -0.022          | [-0.14,0.10]  | 0.7134  | -0.021 | [-0.14,0.10]  | 0.7325  | -0.021 | [-0.14,0.10]  | 0.7350  | -0.029      | [-0.15,0.09]  | 0.6341  | -0.028 | [-0.15,0.09]  | 0.6519  | -0.030      | [-0.15,0.09]  | 0.6247  |
| Other Activity            | 0.522           | [0.25,0.80]   | 0.0002  | 0.526  | [0.25,0.80]   | 0.0002  | 0.526  | [0.25,0.80]   | 0.0002  | 0.535       | [0.26,0.81]   | 0.0001  | 0.539  | [0.26,0.81]   | 0.0001  | 0.538       | [0.26,0.81]   | 0.0001  |
| Social Programme          | 0.007           | [-0.11,0.12]  | 0.9087  | 0.002  | [-0.12,0.12]  | 0.9799  | 0.005  | [-0.11,0.12]  | 0.9282  | 0.005       | [-0.11,0.12]  | 0.9341  | 0.004  | [-0.11,0.12]  | 0.9462  | 0.014       | [-0.10,0.13]  | 0.8124  |
| Chronically Ill           | 1.185           | [1.06,1.31]   | 0.0000  | 1.187  | [1.06,1.31]   | 0.0000  | 1.184  | [1.06,1.31]   | 0.0000  | 1.185       | [1.06,1.31]   | 0.0000  | 1.186  | [1.06,1.32]   | 0.0000  | 1.201       | [1.07,1.33]   | 0.0000  |
| Victim of Violence        | 2.384           | [2.09,2.68]   | 0.0000  | 2.388  | [2.10,2.68]   | 0.0000  | 2.389  | [2.10,2.68]   | 0.0000  | 2.434       | [2.14,2.73]   | 0.0000  | 2.435  | [2.14,2.73]   | 0.0000  | 2.454       | [2.16,2.75]   | 0.0000  |
| Limitations in Activities | 1.100           | [1.01,1.19]   | 0.0000  | 1.099  | [1.00,1.19]   | 0.0000  | 1.097  | [1.00,1.19]   | 0.0000  | 1.084       | [0.99,1.18]   | 0.0000  | 1.083  | [0.99,1.18]   | 0.0000  | 1.095       | [1.00,1.19]   | 0.0000  |
| Drinks few times a year   | 0.177           | [0.07,0.28]   | 0.0011  | 0.179  | [0.07,0.29]   | 0.0010  | 0.178  | [0.07,0.28]   | 0.0011  | 0.189       | [0.08,0.30]   | 0.0005  | 0.190  | [0.08,0.30]   | 0.0005  | 0.190       | [0.08,0.30]   | 0.0005  |
| Drinks few times a month  | 0.187           | [0.06,0.32]   | 0.0049  | 0.190  | [0.06,0.32]   | 0.0043  | 0.192  | [0.06,0.32]   | 0.0039  | 0.186       | [0.06,0.32]   | 0.0053  | 0.187  | [0.06,0.32]   | 0.0051  | 0.185       | [0.05,0.32]   | 0.0057  |
| Drinks Weekly/Daily       | 0.403           | [0.24,0.56]   | 0.0000  | 0.410  | [0.25,0.57]   | 0.0000  | 0.411  | [0.25,0.57]   | 0.0000  | 0.423       | [0.26,0.58]   | 0.0000  | 0.427  | [0.27,0.59]   | 0.0000  | 0.430       | [0.27,0.59]   | 0.0000  |
| Has Health Insurance      | -0.041          | [-0.15,0.07]  | 0.4528  | -0.043 | [-0.15,0.07]  | 0.4378  | -0.045 | [-0.15,0.06]  | 0.4097  | -0.029      | [-0.14,0.08]  | 0.6050  | -0.031 | [-0.14,0.08]  | 0.5721  | -0.041      | [-0.15,0.07]  | 0.4551  |
| Hospitals/Pop             | -0.018          | [-0.06,0.02]  | 0.3501  | -0.018 | [-0.06,0.02]  | 0.3517  | -0.019 | [-0.06,0.02]  | 0.3315  | -0.092      | [-0.23,0.04]  | 0.1789  | -0.090 | [-0.22,0.04]  | 0.1683  | -0.088      | [-0.16,-0.01] | 0.0223  |
| Mean Wealth               | 0.078           | [-0.06,0.22]  | 0.2734  | 0.067  | [-0.07,0.21]  | 0.3454  | 0.063  | [-0.08,0.20]  | 0.3727  | 0.179       | [-0.15,0.51]  | 0.2896  | 0.175  | [-0.14,0.49]  | 0.2759  | 0.170       | [-0.02,0.36]  | 0.0737  |
| Constant                  | -0.851          | [-2.28,0.57]  | 0.2420  | -0.645 | [-2.08,0.79]  | 0.3788  | -0.324 | [-1.78,1.13]  | 0.6619  | -1.891      | [-5.15,1.36]  | 0.2548  | -1.722 | [-4.83,1.38]  | 0.2770  | -1.388      | [-3.26,0.49]  | 0.1472  |
| Obs                       | 44,324          |               |         | 44,324 |               |         | 44,324 |               |         | 44,324      |               |         | 44,324 |               |         | 44,324      |               |         |
| Overall-R2                | 0.0875          |               |         | 0.0876 |               |         | 0.0878 |               |         | 0.0880      |               |         | 0.0882 |               |         | 0.0884      |               |         |
| Between-R2                | 0.0927          |               |         | 0.0931 |               |         | 0.0932 |               |         | 0.3135      |               |         | 0.3235 |               |         | 0.3458      |               |         |
| Within-R2                 | 0.0864          |               |         | 0.0865 |               |         | 0.0867 |               |         | 0.0867      |               |         | 0.0868 |               |         | 0.0869      |               |         |

For models 1-3 the second level is the municipality. For models 4-6 the second level is the state.

ROBUSTNESS CHECK 3.b – Multilevel linear regression models with Municipality + Employment status reference groups

## 3.c) Measures of relative deprivation and relative affluence based on non-linear (concave) relative deprivation index

|                           | MUNICIPAL LEVEL |               |         |        |               |         |        |               |         | STATE LEVEL |               |         |        |               |         |             |               |         |
|---------------------------|-----------------|---------------|---------|--------|---------------|---------|--------|---------------|---------|-------------|---------------|---------|--------|---------------|---------|-------------|---------------|---------|
|                           | (1)             |               |         | (2)    |               |         | (3)    |               |         | (4)         |               |         | (5)    |               |         | (6)         |               |         |
|                           | Beta            | 95% CI        | P-Value | Beta   | 95% CI        | P-Value | Beta   | 95% CI        | P-Value | Beta        | 95% CI        | P-Value | Beta   | 95% CI        | P-Value | Beta        | 95% CI        | P-Value |
| Poorest Quartile          | 0.662           | [0.39,0.93]   | 0.0000  | 0.550  | [0.25,0.85]   | 0.0004  | 0.473  | [0.17,0.78]   | 0.0025  | 0.509       | [0.30,0.72]   | 0.0000  | 0.434  | [0.21,0.66]   | 0.0001  | 0.412       | [0.19,0.63]   | 0.0003  |
| 2nd Quartile              | 0.643           | [0.47,0.82]   | 0.0000  | 0.546  | [0.34,0.76]   | 0.0000  | 0.425  | [0.20,0.65]   | 0.0002  | 0.596       | [0.44,0.75]   | 0.0000  | 0.512  | [0.34,0.68]   | 0.0000  | 0.451       | [0.28,0.62]   | 0.0000  |
| 3rd Quartile              | 0.355           | [0.22,0.49]   | 0.0000  | 0.285  | [0.13,0.44]   | 0.0004  | 0.183  | [0.01,0.35]   | 0.0331  | 0.342       | [0.21,0.47]   | 0.0000  | 0.271  | [0.13,0.41]   | 0.0002  | 0.221       | [0.08,0.37]   | 0.0029  |
| Rel Deprivation           | 0.584           | [0.22,0.95]   | 0.0016  | 0.473  | [0.09,0.86]   | 0.0161  | 0.405  | [0.02,0.79]   | 0.0402  | 0.735       | [0.43,1.04]   | 0.0000  | 0.544  | [0.20,0.89]   | 0.0020  | 0.474       | [0.13,0.82]   | 0.0071  |
| Rel Affluence             |                 |               |         | -0.082 | [-0.18,0.01]  | 0.0971  | -0.385 | [-0.59,-0.18] | 0.0002  |             |               |         | -0.097 | [-0.18,-0.01] | 0.0234  | -0.389      | [-0.59,-0.19] | 0.0001  |
| Gini                      | -0.627          | [-3.99,2.73]  | 0.7145  | -0.343 | [-3.72,3.04]  | 0.8424  | -1.988 | [-5.50,1.53]  | 0.2677  | 2.333       | [-4.60,9.26]  | 0.5096  | 2.479  | [-4.97,9.93]  | 0.5145  | 0.975       | [-2.92,4.87]  | 0.6238  |
| Rel Affluence*Gini        |                 |               |         |        |               |         | 1.735  | [0.73,2.74]   | 0.0008  |             |               |         |        |               | 1.472   | [0.55,2.40] | 0.0018        |         |
| N people in HH            | 0.038           | [0.01,0.06]   | 0.0023  | 0.039  | [0.01,0.06]   | 0.0021  | 0.039  | [0.01,0.06]   | 0.0018  | 0.031       | [0.01,0.06]   | 0.0143  | 0.032  | [0.01,0.06]   | 0.0121  | 0.036       | [0.01,0.06]   | 0.0044  |
| Female                    | 1.665           | [1.55,1.78]   | 0.0000  | 1.668  | [1.55,1.78]   | 0.0000  | 1.668  | [1.55,1.79]   | 0.0000  | 1.684       | [1.57,1.80]   | 0.0000  | 1.685  | [1.57,1.80]   | 0.0000  | 1.683       | [1.57,1.80]   | 0.0000  |
| Age                       | 0.113           | [0.10,0.13]   | 0.0000  | 0.113  | [0.10,0.13]   | 0.0000  | 0.113  | [0.10,0.13]   | 0.0000  | 0.114       | [0.10,0.13]   | 0.0000  | 0.115  | [0.10,0.13]   | 0.0000  | 0.113       | [0.10,0.13]   | 0.0000  |
| Age <sup>2</sup>          | -0.001          | [-0.00,-0.00] | 0.0000  | -0.001 | [-0.00,-0.00] | 0.0000  | -0.001 | [-0.00,-0.00] | 0.0000  | -0.001      | [-0.00,-0.00] | 0.0000  | -0.001 | [-0.00,-0.00] | 0.0000  | -0.001      | [-0.00,-0.00] | 0.0000  |
| Married                   | -0.396          | [-0.49,-0.30] | 0.0000  | -0.395 | [-0.49,-0.30] | 0.0000  | -0.391 | [-0.48,-0.30] | 0.0000  | -0.395      | [-0.49,-0.30] | 0.0000  | -0.393 | [-0.49,-0.30] | 0.0000  | -0.371      | [-0.46,-0.28] | 0.0000  |
| No education / Primary    | -0.384          | [-0.50,-0.27] | 0.0000  | -0.381 | [-0.49,-0.27] | 0.0000  | -0.382 | [-0.50,-0.27] | 0.0000  | -0.376      | [-0.49,-0.26] | 0.0000  | -0.375 | [-0.49,-0.26] | 0.0000  | -0.387      | [-0.50,-0.27] | 0.0000  |
| Secondary                 | -0.887          | [-1.02,-0.75] | 0.0000  | -0.873 | [-1.01,-0.74] | 0.0000  | -0.865 | [-1.00,-0.73] | 0.0000  | -0.899      | [-1.03,-0.77] | 0.0000  | -0.885 | [-1.02,-0.75] | 0.0000  | -0.902      | [-1.03,-0.77] | 0.0000  |
| Not Employed              | 0.580           | [0.36,0.80]   | 0.0000  | 0.581  | [0.36,0.80]   | 0.0000  | 0.581  | [0.36,0.80]   | 0.0000  | 0.632       | [0.41,0.85]   | 0.0000  | 0.634  | [0.41,0.85]   | 0.0000  | 0.639       | [0.42,0.86]   | 0.0000  |
| Retired                   | -0.116          | [-0.36,0.13]  | 0.3493  | -0.113 | [-0.36,0.13]  | 0.3617  | -0.112 | [-0.36,0.13]  | 0.3667  | -0.111      | [-0.36,0.13]  | 0.3748  | -0.108 | [-0.35,0.14]  | 0.3878  | -0.129      | [-0.37,0.12]  | 0.3012  |
| Student                   | 0.434           | [0.11,0.76]   | 0.0091  | 0.438  | [0.11,0.76]   | 0.0085  | 0.448  | [0.12,0.77]   | 0.0071  | 0.456       | [0.13,0.78]   | 0.0066  | 0.459  | [0.13,0.79]   | 0.0062  | 0.468       | [0.14,0.80]   | 0.0054  |
| House Work                | -0.034          | [-0.15,0.09]  | 0.5778  | -0.036 | [-0.15,0.08]  | 0.5536  | -0.035 | [-0.15,0.08]  | 0.5606  | -0.044      | [-0.16,0.08]  | 0.4730  | -0.045 | [-0.16,0.07]  | 0.4632  | -0.047      | [-0.17,0.07]  | 0.4377  |
| Other Activity            | 0.511           | [0.24,0.79]   | 0.0003  | 0.512  | [0.24,0.79]   | 0.0003  | 0.513  | [0.24,0.79]   | 0.0002  | 0.520       | [0.24,0.80]   | 0.0002  | 0.523  | [0.25,0.80]   | 0.0002  | 0.523       | [0.25,0.80]   | 0.0002  |
| Social Programme          | 0.005           | [-0.11,0.12]  | 0.9360  | 0.001  | [-0.12,0.12]  | 0.9871  | 0.006  | [-0.11,0.12]  | 0.9212  | -0.002      | [-0.12,0.12]  | 0.9768  | -0.003 | [-0.12,0.11]  | 0.9621  | 0.011       | [-0.11,0.13]  | 0.8485  |
| Chronically Ill           | 1.186           | [1.06,1.31]   | 0.0000  | 1.186  | [1.06,1.31]   | 0.0000  | 1.183  | [1.06,1.31]   | 0.0000  | 1.186       | [1.06,1.31]   | 0.0000  | 1.185  | [1.06,1.31]   | 0.0000  | 1.202       | [1.07,1.33]   | 0.0000  |
| Victim of Violence        | 2.387           | [2.09,2.68]   | 0.0000  | 2.390  | [2.10,2.68]   | 0.0000  | 2.391  | [2.10,2.68]   | 0.0000  | 2.438       | [2.14,2.73]   | 0.0000  | 2.438  | [2.14,2.73]   | 0.0000  | 2.459       | [2.16,2.75]   | 0.0000  |
| Limitations in Activities | 1.100           | [1.01,1.19]   | 0.0000  | 1.100  | [1.01,1.19]   | 0.0000  | 1.098  | [1.00,1.19]   | 0.0000  | 1.085       | [0.99,1.18]   | 0.0000  | 1.083  | [0.99,1.18]   | 0.0000  | 1.097       | [1.00,1.19]   | 0.0000  |
| Drinks few times a year   | 0.179           | [0.07,0.29]   | 0.0010  | 0.180  | [0.07,0.29]   | 0.0010  | 0.178  | [0.07,0.29]   | 0.0010  | 0.192       | [0.09,0.30]   | 0.0004  | 0.192  | [0.09,0.30]   | 0.0004  | 0.191       | [0.08,0.30]   | 0.0004  |
| Drinks few times a month  | 0.188           | [0.06,0.32]   | 0.0047  | 0.190  | [0.06,0.32]   | 0.0043  | 0.193  | [0.06,0.32]   | 0.0037  | 0.188       | [0.06,0.32]   | 0.0049  | 0.189  | [0.06,0.32]   | 0.0046  | 0.186       | [0.06,0.32]   | 0.0053  |
| Drinks Weekly/Daily       | 0.405           | [0.25,0.56]   | 0.0000  | 0.410  | [0.25,0.57]   | 0.0000  | 0.412  | [0.25,0.57]   | 0.0000  | 0.426       | [0.27,0.58]   | 0.0000  | 0.428  | [0.27,0.59]   | 0.0000  | 0.433       | [0.27,0.59]   | 0.0000  |
| Has Health Insurance      | -0.043          | [-0.15,0.07]  | 0.4366  | -0.044 | [-0.15,0.06]  | 0.4236  | -0.046 | [-0.15,0.06]  | 0.4012  | -0.031      | [-0.14,0.08]  | 0.5777  | -0.032 | [-0.14,0.08]  | 0.5591  | -0.043      | [-0.15,0.07]  | 0.4350  |
| Hospitals/Pop             | -0.018          | [-0.06,0.02]  | 0.3524  | -0.018 | [-0.05,0.02]  | 0.3574  | -0.018 | [-0.06,0.02]  | 0.3381  | -0.090      | [-0.22,0.04]  | 0.1897  | -0.087 | [-0.23,0.06]  | 0.2337  | -0.086      | [-0.16,-0.01] | 0.0224  |
| Mean Wealth               | 0.091           | [-0.05,0.23]  | 0.1935  | 0.085  | [-0.05,0.22]  | 0.2245  | 0.074  | [-0.06,0.21]  | 0.2896  | 0.187       | [-0.14,0.52]  | 0.2675  | 0.186  | [-0.17,0.54]  | 0.3040  | 0.179       | [-0.00,0.36]  | 0.0535  |
| Constant                  | -0.971          | [-2.39,0.45]  | 0.1791  | -0.821 | [-2.25,0.61]  | 0.2601  | -0.386 | [-1.84,1.07]  | 0.6025  | -1.969      | [-5.22,1.28]  | 0.2357  | -1.821 | [-5.32,1.67]  | 0.3070  | -1.418      | [-3.26,0.42]  | 0.1304  |
| Obs                       | 44,324          |               |         | 44,324 |               |         | 44,324 |               |         | 44,324      |               |         | 44,324 |               |         | 44,324      |               |         |
| Overall-R2                | 0.0874          |               |         | 0.0875 |               |         | 0.0878 |               |         | 0.0880      |               |         | 0.0881 |               |         | 0.0884      |               |         |
| Between-R2                | 0.0912          |               |         | 0.0921 |               |         | 0.0918 |               |         | 0.3145      |               |         | 0.3180 |               |         | 0.3401      |               |         |
| Within-R2                 | 0.0864          |               |         | 0.0865 |               |         | 0.0867 |               |         | 0.0866      |               |         | 0.0867 |               |         | 0.0869      |               |         |

For models 1-3 the second level is the municipality. For models 4-6 the second level is the state.

*ROBUSTNESS CHECK 3.c – Multilevel linear regression models with a concave relative deprivation index*



## 5) Stepwise regressions results, showing the stability of signs and significance levels of our variables of interest across all alternative combinations.

Note: given the large number of regressions, the table below is presented in a reduced format (\*, \*\* and \*\*\* indicate significance at 0.05, 0.01 and 0.001 levels, respectively).

## MUNICIPAL LEVEL

|                          | (1)       | (2)       | (3)       | (4)       | (5)       | (6)       | (7)       | (8)       | (9)       | (10)      | (11)      | (12)      | (13)      | (14)      | (15)      |
|--------------------------|-----------|-----------|-----------|-----------|-----------|-----------|-----------|-----------|-----------|-----------|-----------|-----------|-----------|-----------|-----------|
| Poorest Quartile         | 1.015***  |           |           |           | 0.682***  | 0.748***  | 1.015***  |           |           |           | 0.503**   | 0.681***  | 0.748***  |           | 0.455**   |
| 2 <sup>nd</sup> Quartile | 0.820***  |           |           |           | 0.653***  | 0.627***  | 0.820***  |           |           |           | 0.515***  | 0.652***  | 0.627***  |           | 0.413***  |
| 3 <sup>rd</sup> Quartile | 0.432***  |           |           |           | 0.360***  | 0.305***  | 0.432***  |           |           |           | 0.265**   | 0.360***  | 0.306***  |           | 0.175*    |
| Rel Deprivation          |           | 0.294***  |           |           | 0.134**   |           |           | 0.164***  | 0.294***  |           | 0.119**   | 0.135**   |           | 0.164***  | 0.095*    |
| Rel Affluence            |           |           | -0.344*** |           |           | -0.122**  |           | -0.227*** |           | -0.345*** | -0.099*   |           | -0.122**  | -0.227*** | -0.385*** |
| Gini                     |           |           |           | 0.139     |           |           | -0.482    |           | -0.838    | 0.797     |           | -0.707    | -0.099    | 0.026     | -1.904    |
| Rel Affluence*Gini       |           |           |           |           |           |           |           |           |           |           |           |           |           |           | 1.641**   |
| N people in HH           | 0.036**   | 0.037**   | 0.036**   | 0.021     | 0.038**   | 0.037**   | 0.036**   | 0.040**   | 0.037**   | 0.036**   | 0.039**   | 0.038**   | 0.037**   | 0.040**   | 0.039**   |
| Female                   | 1.661***  | 1.643***  | 1.656***  | 1.582***  | 1.664***  | 1.667***  | 1.661***  | 1.665***  | 1.643***  | 1.656***  | 1.668***  | 1.664***  | 1.667***  | 1.665***  | 1.669***  |
| Age                      | 0.111***  | 0.110***  | 0.111***  | 0.101***  | 0.113***  | 0.112***  | 0.111***  | 0.113***  | 0.110***  | 0.111***  | 0.113***  | 0.113***  | 0.112***  | 0.113***  | 0.113***  |
| Age <sup>2</sup>         | -0.001*** | -0.001*** | -0.001*** | -0.001*** | -0.001*** | -0.001*** | -0.001*** | -0.001*** | -0.001*** | -0.001*** | -0.001*** | -0.001*** | -0.001*** | -0.001*** | -0.001*** |
| Married                  | -0.405*** | -0.412*** | -0.413*** | -0.481*** | -0.397*** | -0.400*** | -0.405*** | -0.397*** | -0.412*** | -0.413*** | -0.394*** | -0.397*** | -0.400*** | -0.397*** | -0.391*** |
| No education /           | -0.392*** | -0.416*** | -0.412*** | -0.528*** | -0.385*** | -0.385*** | -0.392*** | -0.389*** | -0.415*** | -0.412*** | -0.380*** | -0.384*** | -0.385*** | -0.389*** | -0.381*** |
| Primary                  |           |           |           |           |           |           |           |           |           |           |           |           |           |           |           |
| Secondary                | -0.905*** | -1.009*** | -0.932*** | -1.254*** | -0.890*** | -0.879*** | -0.904*** | -0.905*** | -1.007*** | -0.933*** | -0.871*** | -0.888*** | -0.879*** | -0.905*** | -0.863*** |
| Not Employed             | 0.583***  | 0.587***  | 0.595***  | 0.612***  | 0.579***  | 0.584***  | 0.583***  | 0.587***  | 0.587***  | 0.595***  | 0.581***  | 0.580***  | 0.584***  | 0.587***  | 0.581***  |
| Retired                  | -0.126    | -0.135    | -0.131    | -0.213    | -0.117    | -0.119    | -0.126    | -0.115    | -0.135    | -0.131    | -0.112    | -0.117    | -0.119    | -0.115    | -0.112    |
| Student                  | 0.418*    | 0.395*    | 0.403*    | 0.264     | 0.433**   | 0.428*    | 0.419*    | 0.429*    | 0.396*    | 0.402*    | 0.439**   | 0.433**   | 0.428*    | 0.429*    | 0.448**   |
| House Work               | -0.037    | -0.019    | -0.037    | -0.015    | -0.033    | -0.039    | -0.037    | -0.032    | -0.019    | -0.037    | -0.036    | -0.033    | -0.039    | -0.032    | -0.035    |
| Other Activity           | 0.511***  | 0.514***  | 0.521***  | 0.526***  | 0.510***  | 0.513***  | 0.511***  | 0.516***  | 0.515***  | 0.520***  | 0.512***  | 0.511***  | 0.513***  | 0.516***  | 0.513***  |
| Social Programme         | 0.006     | 0.040     | 0.028     | 0.137*    | 0.007     | 0.000     | 0.006     | 0.011     | 0.040     | 0.028     | 0.001     | 0.006     | 0.000     | 0.011     | 0.006     |
| Chronically Ill          | 1.184***  | 1.184***  | 1.184***  | 1.172***  | 1.185***  | 1.186***  | 1.184***  | 1.187***  | 1.184***  | 1.184***  | 1.186***  | 1.185***  | 1.186***  | 1.187***  | 1.184***  |
| Victim of Violence       | 2.390***  | 2.378***  | 2.402***  | 2.396***  | 2.385***  | 2.393***  | 2.390***  | 2.390***  | 2.378***  | 2.402***  | 2.388***  | 2.384***  | 2.393***  | 2.390***  | 2.389***  |
| Limitations in           | 1.102***  | 1.106***  | 1.105***  | 1.120***  | 1.100***  | 1.101***  | 1.102***  | 1.102***  | 1.106***  | 1.105***  | 1.099***  | 1.100***  | 1.101***  | 1.102***  | 1.097***  |
| Activities               |           |           |           |           |           |           |           |           |           |           |           |           |           |           |           |
| Drinks few times a       | 0.176**   | 0.167**   | 0.172**   | 0.141**   | 0.177**   | 0.178**   | 0.176**   | 0.177**   | 0.168**   | 0.172**   | 0.179**   | 0.178**   | 0.178**   | 0.177**   | 0.178**   |
| year                     |           |           |           |           |           |           |           |           |           |           |           |           |           |           |           |
| Drinks few times a       | 0.184**   | 0.170*    | 0.180**   | 0.131*    | 0.187**   | 0.188**   | 0.184**   | 0.185**   | 0.170*    | 0.180**   | 0.190**   | 0.187**   | 0.188**   | 0.185**   | 0.193**   |
| month                    |           |           |           |           |           |           |           |           |           |           |           |           |           |           |           |
| Drinks Weekly/Daily      | 0.402***  | 0.386***  | 0.409***  | 0.346***  | 0.404***  | 0.409***  | 0.401***  | 0.409***  | 0.385***  | 0.409***  | 0.410***  | 0.403***  | 0.409***  | 0.409***  | 0.412***  |
| Has Health Insurance     | -0.050    | -0.031    | -0.052    | -0.061    | -0.041    | -0.050    | -0.050    | -0.038    | -0.031    | -0.052    | -0.042    | -0.041    | -0.050    | -0.038    | -0.045    |
| Hospitals/Pop            | -0.018    | -0.014    | -0.018    | -0.020    | -0.017    | -0.018    | -0.018    | -0.016    | -0.015    | -0.017    | -0.017    | -0.017    | -0.018    | -0.016    | -0.018    |
| Mean Wealth              | 0.154***  | 0.030     | 0.030     | 0.061     | 0.102*    | 0.119**   | 0.138*    | 0.024     | 0.002     | 0.057     | 0.080     | 0.078     | 0.116     | 0.025     | 0.063     |
| Constant                 | -1.429*** | -0.207    | 0.311     | 0.344     | -1.117**  | -0.986*   | -1.255    | 0.003     | 0.096     | 0.022     | -0.793    | -0.860    | -0.951    | -0.007    | -0.291    |
| Obs.                     | 44,324    | 44,324    | 44,324    | 44,324    | 44,324    | 44,324    | 44,324    | 44,324    | 44,324    | 44,324    | 44,324    | 44,324    | 44,324    | 44,324    | 44,324    |
| Overall-R2               | 0.0872    | 0.0861    | 0.0864    | 0.0837    | 0.0875    | 0.0874    | 0.0872    | 0.0870    | 0.0861    | 0.0865    | 0.0876    | 0.0875    | 0.0874    | 0.0870    | 0.0878    |
| Between-R2               | 0.0868    | 0.0903    | 0.0827    | 0.0911    | 0.0940    | 0.0894    | 0.0868    | 0.0894    | 0.0905    | 0.0835    | 0.0951    | 0.0942    | 0.0894    | 0.0894    | 0.0941    |
| Within-R2                | 0.0862    | 0.0853    | 0.0856    | 0.0824    | 0.0864    | 0.0864    | 0.0862    | 0.0861    | 0.0853    | 0.0856    | 0.0865    | 0.0864    | 0.0864    | 0.0861    | 0.0867    |

Note: given the large number of regressions, the table below is presented in a reduced format (\*, \*\* and \*\*\* indicate significance at 0.05, 0.01 and 0.001 levels, respectively).

### STATE LEVEL

|                          | (1)       | (2)       | (3)       | (4)       | (5)       | (6)       | (7)       | (8)       | (9)       | (10)      | (11)      | (12)      | (13)      | (14)      | (15)      |
|--------------------------|-----------|-----------|-----------|-----------|-----------|-----------|-----------|-----------|-----------|-----------|-----------|-----------|-----------|-----------|-----------|
| Poorest Quartile         | 0.874***  |           |           |           | 0.542***  | 0.593***  | 0.875***  |           |           |           | 0.430***  | 0.543***  | 0.592***  |           | 0.418***  |
| 2 <sup>nd</sup> Quartile | 0.782***  |           |           |           | 0.610***  | 0.563***  | 0.783***  |           |           |           | 0.505***  | 0.610***  | 0.562***  |           | 0.455***  |
| 3 <sup>rd</sup> Quartile | 0.423***  |           |           |           | 0.349***  | 0.271***  | 0.423***  |           |           |           | 0.267***  | 0.349***  | 0.271***  |           | 0.224**   |
| Rel Deprivation          |           | 0.279***  |           |           | 0.173***  |           |           | 0.164***  | 0.279***  |           | 0.137***  | 0.173***  |           | 0.164***  | 0.120***  |
| Rel Affluence            |           |           | -0.324*** |           |           | -0.161*** |           | -0.213*** |           | -0.324*** | -0.102*   |           | -0.162*** | -0.213*** | -0.367*** |
| Gini                     |           |           |           | 2.317     |           |           | 2.472     |           | 2.122     | 2.771     |           | 2.340     | 2.635     | 2.499     | 1.119     |
| Rel Affluence*Gini       |           |           |           |           |           |           |           |           |           |           |           |           |           |           | 1.342**   |
| N people in HH           | 0.026*    | 0.030*    | 0.030*    | 0.014     | 0.031*    | 0.030*    | 0.026*    | 0.034**   | 0.030*    | 0.030*    | 0.035**   | 0.031*    | 0.030*    | 0.034**   | 0.036**   |
| Female                   | 1.690***  | 1.639***  | 1.655***  | 1.595***  | 1.680***  | 1.690***  | 1.690***  | 1.660***  | 1.639***  | 1.655***  | 1.682***  | 1.681***  | 1.690***  | 1.660***  | 1.681***  |
| Age                      | 0.112***  | 0.110***  | 0.111***  | 0.102***  | 0.114***  | 0.114***  | 0.113***  | 0.111***  | 0.111***  | 0.111***  | 0.114***  | 0.114***  | 0.113***  | 0.113***  | 0.114***  |
| Age <sup>2</sup>         | -0.001*** | -0.001*** | -0.001*** | -0.001*** | -0.001*** | -0.001*** | -0.001*** | -0.001*** | -0.001*** | -0.001*** | -0.001*** | -0.001*** | -0.001*** | -0.001*** | -0.001*** |
| Married                  | -0.413*** | -0.407*** | -0.411*** | -0.475*** | -0.394*** | -0.400*** | -0.414*** | -0.393*** | -0.409*** | -0.412*** | -0.382*** | -0.394*** | -0.400*** | -0.394*** | -0.373*** |
| No education /           | -0.377*** | -0.438*** | -0.431*** | -0.525*** | -0.399*** | -0.375*** | -0.377*** | -0.412*** | -0.437*** | -0.430*** | -0.381*** | -0.379*** | -0.375*** | -0.411*** | -0.387*** |
| Primary                  |           |           |           |           |           |           |           |           |           |           |           |           |           |           |           |
| Secondary                | -0.908*** | -1.076*** | -0.999*** | -1.276*** | -0.902*** | -0.883*** | -0.908*** | -0.977*** | -1.076*** | -0.998*** | -0.894*** | -0.902*** | -0.883*** | -0.976*** | -0.901*** |
| Not Employed             | 0.635***  | 0.645***  | 0.654***  | 0.667***  | 0.630***  | 0.638***  | 0.635***  | 0.645***  | 0.644***  | 0.654***  | 0.636***  | 0.630***  | 0.638***  | 0.645***  | 0.637***  |
| Retired                  | -0.118    | -0.152    | -0.144    | -0.214    | -0.112    | -0.112    | -0.117    | -0.132    | -0.151    | -0.143    | -0.116    | -0.112    | -0.112    | -0.130    | -0.127    |
| Student                  | 0.434**   | 0.400*    | 0.410*    | 0.286     | 0.454**   | 0.450**   | 0.435**   | 0.434**   | 0.400*    | 0.410*    | 0.462**   | 0.455**   | 0.451**   | 0.435**   | 0.467**   |
| House Work               | -0.054    | -0.019    | -0.036    | -0.020    | -0.042    | -0.051    | -0.054    | -0.030    | -0.018    | -0.036    | -0.044    | -0.042    | -0.051    | -0.029    | -0.045    |
| Other Activity           | 0.516***  | 0.534***  | 0.537***  | 0.540***  | 0.521***  | 0.522***  | 0.516***  | 0.535***  | 0.534***  | 0.537***  | 0.524***  | 0.521***  | 0.522***  | 0.534***  | 0.524***  |
| Social Programme         | -0.021    | 0.075     | 0.056     | 0.139*    | 0.006     | -0.013    | -0.022    | 0.047     | 0.074     | 0.056     | 0.009     | 0.006     | -0.014    | 0.046     | 0.016     |
| Chronically Ill          | 1.186***  | 1.183***  | 1.185***  | 1.173***  | 1.185***  | 1.188***  | 1.185***  | 1.187***  | 1.182***  | 1.183***  | 1.194***  | 1.184***  | 1.187***  | 1.185***  | 1.198***  |
| Victim of Violence       | 2.451***  | 2.421***  | 2.441***  | 2.441***  | 2.434***  | 2.447***  | 2.450***  | 2.429***  | 2.419***  | 2.439***  | 2.443***  | 2.433***  | 2.446***  | 2.427***  | 2.451***  |
| Limitations in           | 1.090***  | 1.092***  | 1.091***  | 1.106***  | 1.083***  | 1.087***  | 1.089***  | 1.089***  | 1.091***  | 1.090***  | 1.089***  | 1.083***  | 1.087***  | 1.088***  | 1.093***  |
| Activities               |           |           |           |           |           |           |           |           |           |           |           |           |           |           |           |
| Drinks few times a       | 0.191***  | 0.174**   | 0.178**   | 0.153**   | 0.189***  | 0.192***  | 0.191***  | 0.182***  | 0.173**   | 0.178**   | 0.191***  | 0.189***  | 0.192***  | 0.181***  | 0.190***  |
| year                     |           |           |           |           |           |           |           |           |           |           |           |           |           |           |           |
| Drinks few times a       | 0.186**   | 0.159*    | 0.169*    | 0.128     | 0.186**   | 0.188**   | 0.186**   | 0.173**   | 0.159*    | 0.169*    | 0.187**   | 0.186**   | 0.188**   | 0.173**   | 0.186**   |
| month                    |           |           |           |           |           |           |           |           |           |           |           |           |           |           |           |
| Drinks Weekly/Daily      | 0.426***  | 0.393***  | 0.412***  | 0.362***  | 0.423***  | 0.431***  | 0.426***  | 0.413***  | 0.392***  | 0.412***  | 0.428***  | 0.422***  | 0.431***  | 0.413***  | 0.430***  |
| Has Health Insurance     | -0.044    | -0.018    | -0.042    | -0.049    | -0.028    | -0.042    | -0.043    | -0.026    | -0.017    | -0.041    | -0.034    | -0.027    | -0.042    | -0.025    | -0.039    |
| Hospitals/Pop            | -0.070    | -0.073    | -0.062    | -0.085    | -0.075    | -0.066    | -0.086    | -0.067    | -0.088    | -0.080    | -0.071    | -0.090    | -0.084    | -0.083    | -0.086*   |
| Mean Wealth              | 0.117*    | 0.036     | 0.041     | 0.156     | 0.076     | 0.090     | 0.227     | 0.035     | 0.130     | 0.164     | 0.068     | 0.180     | 0.208     | 0.146     | 0.173     |
| Constant                 | -1.054*   | -0.134    | 0.312     | -0.574    | -0.877    | -0.649    | -2.152    | 0.014     | -1.077    | -0.918    | -0.652    | -1.916    | -1.818    | -1.094    | -1.408    |
| Obs.                     | 44,324    | 44,324    | 44,324    | 44,324    | 44,324    | 44,324    | 44,324    | 44,324    | 44,324    | 44,324    | 44,324    | 44,324    | 44,324    | 44,324    | 44,324    |
| Overall-R2               | 0.0875    | 0.0867    | 0.0870    | 0.0843    | 0.0880    | 0.0879    | 0.0876    | 0.0875    | 0.0867    | 0.0870    | 0.0882    | 0.0881    | 0.0880    | 0.0875    | 0.0884    |
| Between-R2               | 0.3262    | 0.3328    | 0.3215    | 0.3311    | 0.3258    | 0.3321    | 0.3125    | 0.3326    | 0.3149    | 0.3134    | 0.3374    | 0.3099    | 0.3199    | 0.3184    | 0.3355    |
| Within-R2                | 0.0861    | 0.0853    | 0.0855    | 0.0827    | 0.0867    | 0.0865    | 0.0861    | 0.0861    | 0.0853    | 0.0855    | 0.0868    | 0.0867    | 0.0865    | 0.0861    | 0.0870    |

## 6) Regression models including sample weights

|                           | MUNICIPAL LEVEL |               |         |        |               |         |        |               |         | STATE LEVEL |               |         |        |               |         |        |               |         |
|---------------------------|-----------------|---------------|---------|--------|---------------|---------|--------|---------------|---------|-------------|---------------|---------|--------|---------------|---------|--------|---------------|---------|
|                           | (1)             |               |         | (2)    |               |         | (3)    |               |         | (4)         |               |         | (5)    |               |         | (6)    |               |         |
|                           | Beta            | 95% CI        | P-Value | Beta   | 95% CI        | P-Value | Beta   | 95% CI        | P-Value | Beta        | 95% CI        | P-Value | Beta   | 95% CI        | P-Value | Beta   | 95% CI        | P-Value |
| Poorest Quartile          | 0.622           | [0.33,0.91]   | 0.0000  | 0.441  | [0.09,0.79]   | 0.0144  | 0.406  | [0.06,0.76]   | 0.0232  | 0.533       | [0.27,0.79]   | 0.0001  | 0.358  | [0.06,0.65]   | 0.0167  | 0.340  | [0.05,0.63]   | 0.0233  |
| 2 <sup>nd</sup> Quartile  | 0.642           | [0.45,0.83]   | 0.0000  | 0.506  | [0.26,0.75]   | 0.0001  | 0.443  | [0.20,0.69]   | 0.0004  | 0.604       | [0.43,0.78]   | 0.0000  | 0.460  | [0.25,0.68]   | 0.0000  | 0.401  | [0.18,0.62]   | 0.0004  |
| 3 <sup>rd</sup> Quartile  | 0.361           | [0.23,0.50]   | 0.0000  | 0.267  | [0.09,0.44]   | 0.0027  | 0.215  | [0.04,0.39]   | 0.0177  | 0.345       | [0.21,0.48]   | 0.0000  | 0.243  | [0.08,0.40]   | 0.0032  | 0.189  | [0.02,0.36]   | 0.0269  |
| Rel Deprivation           | 0.152           | [0.06,0.25]   | 0.0017  | 0.136  | [0.04,0.23]   | 0.0052  | 0.124  | [0.03,0.22]   | 0.0122  | 0.178       | [0.09,0.26]   | 0.0001  | 0.149  | [0.06,0.24]   | 0.0010  | 0.134  | [0.04,0.22]   | 0.0038  |
| Rel Affluence             |                 |               |         | -0.097 | [-0.19,-0.00] | 0.0461  | -0.287 | [-0.48,-0.10] | 0.0029  |             |               |         | -0.113 | [-0.20,-0.03] | 0.0099  | -0.492 | [-0.75,-0.23] | 0.0002  |
| Gini                      | -1.237          | [-4.03,1.55]  | 0.3852  | -0.597 | [-3.55,2.35]  | 0.6918  | -1.605 | [-4.90,1.69]  | 0.3398  | 0.738       | [-6.93,8.41]  | 0.8505  | 1.422  | [-6.26,9.11]  | 0.7168  | -0.710 | [-8.67,7.25]  | 0.8611  |
| Rel Affluence*Gini        |                 |               |         |        |               |         | 1.126  | [0.12,2.13]   | 0.0276  |             |               |         |        |               |         | 2.254  | [0.82,3.69]   | 0.0021  |
| N people in HH            | 0.041           | [0.01,0.07]   | 0.0028  | 0.042  | [0.02,0.07]   | 0.0022  | 0.043  | [0.02,0.07]   | 0.0020  | 0.041       | [0.01,0.07]   | 0.0032  | 0.042  | [0.01,0.07]   | 0.0024  | 0.042  | [0.01,0.07]   | 0.0025  |
| Female                    | 1.639           | [1.51,1.77]   | 0.0000  | 1.644  | [1.51,1.77]   | 0.0000  | 1.644  | [1.52,1.77]   | 0.0000  | 1.645       | [1.52,1.77]   | 0.0000  | 1.649  | [1.52,1.78]   | 0.0000  | 1.649  | [1.52,1.78]   | 0.0000  |
| Age                       | 0.110           | [0.09,0.13]   | 0.0000  | 0.110  | [0.09,0.13]   | 0.0000  | 0.110  | [0.09,0.13]   | 0.0000  | 0.110       | [0.09,0.13]   | 0.0000  | 0.110  | [0.09,0.13]   | 0.0000  | 0.110  | [0.09,0.13]   | 0.0000  |
| Age <sup>2</sup>          | -0.001          | [-0.00,-0.00] | 0.0000  | -0.001 | [-0.00,-0.00] | 0.0000  | -0.001 | [-0.00,-0.00] | 0.0000  | -0.001      | [-0.00,-0.00] | 0.0000  | -0.001 | [-0.00,-0.00] | 0.0000  | -0.001 | [-0.00,-0.00] | 0.0000  |
| Married                   | -0.401          | [-0.50,-0.30] | 0.0000  | -0.398 | [-0.50,-0.30] | 0.0000  | -0.396 | [-0.50,-0.29] | 0.0000  | -0.402      | [-0.50,-0.30] | 0.0000  | -0.398 | [-0.50,-0.29] | 0.0000  | -0.395 | [-0.50,-0.29] | 0.0000  |
| No education / Primary    | -0.405          | [-0.53,-0.28] | 0.0000  | -0.400 | [-0.53,-0.27] | 0.0000  | -0.402 | [-0.53,-0.27] | 0.0000  | -0.402      | [-0.53,-0.27] | 0.0000  | -0.397 | [-0.53,-0.27] | 0.0000  | -0.400 | [-0.53,-0.27] | 0.0000  |
| Secondary                 | -0.908          | [-1.05,-0.77] | 0.0000  | -0.889 | [-1.03,-0.75] | 0.0000  | -0.885 | [-1.03,-0.74] | 0.0000  | -0.900      | [-1.04,-0.76] | 0.0000  | -0.880 | [-1.02,-0.74] | 0.0000  | -0.879 | [-1.02,-0.74] | 0.0000  |
| Not Employed              | 0.540           | [0.30,0.78]   | 0.0000  | 0.540  | [0.30,0.78]   | 0.0000  | 0.540  | [0.30,0.78]   | 0.0000  | 0.539       | [0.30,0.78]   | 0.0000  | 0.541  | [0.30,0.78]   | 0.0000  | 0.539  | [0.30,0.78]   | 0.0000  |
| Retired                   | -0.120          | [-0.42,0.18]  | 0.4273  | -0.116 | [-0.41,0.18]  | 0.4418  | -0.115 | [-0.41,0.18]  | 0.4453  | -0.117      | [-0.41,0.18]  | 0.4374  | -0.113 | [-0.41,0.18]  | 0.4533  | -0.118 | [-0.42,0.18]  | 0.4343  |
| Student                   | 0.444           | [0.17,0.71]   | 0.0013  | 0.451  | [0.18,0.72]   | 0.0010  | 0.455  | [0.19,0.72]   | 0.0009  | 0.448       | [0.18,0.72]   | 0.0012  | 0.456  | [0.19,0.73]   | 0.0009  | 0.459  | [0.19,0.73]   | 0.0009  |
| House Work                | -0.020          | [-0.15,0.11]  | 0.7577  | -0.023 | [-0.15,0.11]  | 0.7276  | -0.023 | [-0.15,0.11]  | 0.7292  | -0.023      | [-0.15,0.11]  | 0.7260  | -0.026 | [-0.16,0.10]  | 0.6990  | -0.026 | [-0.16,0.10]  | 0.6980  |
| Other Activity            | 0.512           | [0.22,0.80]   | 0.0005  | 0.513  | [0.22,0.80]   | 0.0005  | 0.513  | [0.22,0.80]   | 0.0005  | 0.509       | [0.22,0.80]   | 0.0006  | 0.511  | [0.22,0.80]   | 0.0005  | 0.510  | [0.22,0.80]   | 0.0006  |
| Social Programme          | 0.037           | [-0.10,0.17]  | 0.5848  | 0.032  | [-0.10,0.17]  | 0.6423  | 0.034  | [-0.10,0.17]  | 0.6176  | 0.028       | [-0.11,0.16]  | 0.6851  | 0.024  | [-0.11,0.16]  | 0.7240  | 0.029  | [-0.11,0.16]  | 0.6702  |
| Chronically Ill           | 1.212           | [1.06,1.36]   | 0.0000  | 1.213  | [1.07,1.36]   | 0.0000  | 1.213  | [1.07,1.36]   | 0.0000  | 1.211       | [1.06,1.36]   | 0.0000  | 1.212  | [1.06,1.36]   | 0.0000  | 1.209  | [1.06,1.36]   | 0.0000  |
| Victim of Violence        | 2.315           | [1.96,2.67]   | 0.0000  | 2.317  | [1.96,2.68]   | 0.0000  | 2.318  | [1.96,2.68]   | 0.0000  | 2.316       | [1.96,2.68]   | 0.0000  | 2.318  | [1.96,2.68]   | 0.0000  | 2.321  | [1.96,2.68]   | 0.0000  |
| Limitations in Activities | 1.073           | [0.94,1.20]   | 0.0000  | 1.073  | [0.94,1.20]   | 0.0000  | 1.072  | [0.94,1.20]   | 0.0000  | 1.074       | [0.94,1.20]   | 0.0000  | 1.073  | [0.94,1.20]   | 0.0000  | 1.071  | [0.94,1.20]   | 0.0000  |
| Drinks few times a year   | 0.169           | [0.06,0.27]   | 0.0015  | 0.171  | [0.07,0.28]   | 0.0013  | 0.172  | [0.07,0.28]   | 0.0013  | 0.173       | [0.07,0.28]   | 0.0012  | 0.175  | [0.07,0.28]   | 0.0011  | 0.173  | [0.07,0.28]   | 0.0012  |
| Drinks few times a month  | 0.174           | [0.05,0.30]   | 0.0054  | 0.177  | [0.05,0.30]   | 0.0046  | 0.179  | [0.06,0.30]   | 0.0042  | 0.175       | [0.05,0.30]   | 0.0051  | 0.178  | [0.06,0.30]   | 0.0043  | 0.180  | [0.06,0.30]   | 0.0041  |
| Drinks Weekly/Daily       | 0.369           | [0.22,0.52]   | 0.0000  | 0.375  | [0.22,0.53]   | 0.0000  | 0.376  | [0.22,0.53]   | 0.0000  | 0.368       | [0.22,0.52]   | 0.0000  | 0.375  | [0.22,0.53]   | 0.0000  | 0.377  | [0.22,0.53]   | 0.0000  |
| Has Health Insurance      | -0.042          | [-0.17,0.08]  | 0.5028  | -0.043 | [-0.17,0.08]  | 0.4936  | -0.045 | [-0.17,0.08]  | 0.4730  | -0.043      | [-0.17,0.08]  | 0.4885  | -0.045 | [-0.17,0.08]  | 0.4769  | -0.046 | [-0.17,0.08]  | 0.4650  |
| Hospitals/Pop             | -0.021          | [-0.06,0.01]  | 0.2335  | -0.021 | [-0.06,0.01]  | 0.2422  | -0.021 | [-0.06,0.01]  | 0.2366  | -0.110      | [-0.22,0.00]  | 0.0575  | -0.107 | [-0.22,0.01]  | 0.0622  | -0.109 | [-0.22,0.00]  | 0.0590  |
| Mean Wealth               | 0.063           | [-0.04,0.16]  | 0.2172  | 0.055  | [-0.05,0.16]  | 0.2885  | 0.054  | [-0.05,0.16]  | 0.2971  | 0.090       | [-0.19,0.37]  | 0.5362  | 0.096  | [-0.19,0.38]  | 0.5075  | 0.092  | [-0.19,0.38]  | 0.5258  |
| Constant                  | -0.579          | [-1.63,0.48]  | 0.2817  | -0.433 | [-1.49,0.62]  | 0.4211  | -0.220 | [-1.30,0.86]  | 0.6908  | -0.808      | [-3.88,2.26]  | 0.6062  | -0.756 | [-3.82,2.31]  | 0.6291  | -0.324 | [-3.43,2.78]  | 0.8381  |
| Obs                       | 44,324          |               |         | 44,324 |               |         | 44,324 |               |         | 44,324      |               |         | 44,324 |               |         | 44,324 |               |         |

For models 1-3 the second level is the municipality. For models 4-6 the second level is the state.

**ROBUSTNESS CHECK 6a – Multilevel models for depressive symptoms using sample weights**

|                           | MUNICIPAL LEVEL |               |         |        |               |         |        |               |         | STATE LEVEL |               |         |        |               |         |             |               |         |
|---------------------------|-----------------|---------------|---------|--------|---------------|---------|--------|---------------|---------|-------------|---------------|---------|--------|---------------|---------|-------------|---------------|---------|
|                           | (1)             | (2)           | (3)     | (4)    | (5)           | (6)     |        |               |         |             |               |         |        |               |         |             |               |         |
|                           | Beta            | 95% CI        | P-Value | Beta   | 95% CI        | P-Value | Beta   | 95% CI        | P-Value | Beta        | 95% CI        | P-Value | Beta   | 95% CI        | P-Value | Beta        | 95% CI        | P-Value |
| Asset Index               | -0.067          | [-0.11,-0.02] | 0.0025  | -0.051 | [-0.09,-0.01] | 0.0243  | -0.055 | [-0.10,-0.01] | 0.0143  | -0.076      | [-0.12,-0.03] | 0.0004  | -0.064 | [-0.11,-0.02] | 0.0021  | -0.069      | [-0.11,-0.03] | 0.0011  |
| Rel Deprivation           | 0.269           | [0.20,0.34]   | 0.0000  | 0.148  | [0.07,0.22]   | 0.0001  | 0.135  | [0.06,0.21]   | 0.0005  | 0.259       | [0.18,0.34]   | 0.0000  | 0.150  | [0.05,0.25]   | 0.0039  | 0.140       | [0.04,0.24]   | 0.0064  |
| Rel Affluence             |                 |               |         | -0.211 | [-0.28,-0.14] | 0.0000  | -0.501 | [-0.67,-0.34] | 0.0000  |             |               |         | -0.198 | [-0.30,-0.10] | 0.0001  | -0.656      | [-0.85,-0.46] | 0.0000  |
| Gini                      | -1.396          | [-4.19,1.40]  | 0.3273  | -0.059 | [-2.94,2.82]  | 0.9678  | -1.889 | [-5.12,1.34]  | 0.2515  | -2.845      | [-13.88,8.19] | 0.6133  | -1.627 | [-12.89,9.64] | 0.7771  | -4.524      | [-16.01,6.97] | 0.4403  |
| Rel Affluence*Gini        |                 |               |         |        |               |         | 1.904  | [0.92,2.89]   | 0.0002  |             |               |         |        |               | 2.851   | [1.42,4.29] | 0.0001        |         |
| N people in HH            | 0.001           | [-0.04,0.04]  | 0.9480  | 0.014  | [-0.02,0.05]  | 0.4816  | 0.012  | [-0.03,0.05]  | 0.5448  | -0.009      | [-0.05,0.03]  | 0.6691  | 0.002  | [-0.04,0.04]  | 0.9199  | -0.001      | [-0.04,0.04]  | 0.9701  |
| Female                    | 1.617           | [1.49,1.75]   | 0.0000  | 1.640  | [1.51,1.77]   | 0.0000  | 1.640  | [1.51,1.77]   | 0.0000  | 1.617       | [1.45,1.79]   | 0.0000  | 1.636  | [1.46,1.81]   | 0.0000  | 1.634       | [1.46,1.81]   | 0.0000  |
| Age                       | 0.108           | [0.09,0.13]   | 0.0000  | 0.110  | [0.09,0.13]   | 0.0000  | 0.111  | [0.09,0.13]   | 0.0000  | 0.109       | [0.09,0.13]   | 0.0000  | 0.111  | [0.09,0.13]   | 0.0000  | 0.112       | [0.09,0.13]   | 0.0000  |
| Age <sup>2</sup>          | -0.001          | [-0.00,-0.00] | 0.0000  | -0.001 | [-0.00,-0.00] | 0.0000  | -0.001 | [-0.00,-0.00] | 0.0000  | -0.001      | [-0.00,-0.00] | 0.0000  | -0.001 | [-0.00,-0.00] | 0.0000  | -0.001      | [-0.00,-0.00] | 0.0000  |
| Married                   | -0.446          | [-0.55,-0.34] | 0.0000  | -0.424 | [-0.53,-0.32] | 0.0000  | -0.421 | [-0.53,-0.32] | 0.0000  | -0.468      | [-0.59,-0.34] | 0.0000  | -0.449 | [-0.57,-0.32] | 0.0000  | -0.448      | [-0.57,-0.32] | 0.0000  |
| No education / Primary    | -0.433          | [-0.56,-0.31] | 0.0000  | -0.407 | [-0.54,-0.28] | 0.0000  | -0.410 | [-0.54,-0.28] | 0.0000  | -0.495      | [-0.65,-0.34] | 0.0000  | -0.472 | [-0.63,-0.31] | 0.0000  | -0.477      | [-0.63,-0.32] | 0.0000  |
| Secondary                 | -1.012          | [-1.15,-0.87] | 0.0000  | -0.918 | [-1.06,-0.77] | 0.0000  | -0.901 | [-1.04,-0.76] | 0.0000  | -1.109      | [-1.27,-0.95] | 0.0000  | -1.023 | [-1.18,-0.86] | 0.0000  | -1.016      | [-1.18,-0.85] | 0.0000  |
| Not Employed              | 0.543           | [0.30,0.78]   | 0.0000  | 0.543  | [0.30,0.78]   | 0.0000  | 0.540  | [0.30,0.78]   | 0.0000  | 0.615       | [0.37,0.86]   | 0.0000  | 0.616  | [0.37,0.86]   | 0.0000  | 0.613       | [0.37,0.86]   | 0.0000  |
| Retired                   | -0.122          | [-0.42,0.18]  | 0.4224  | -0.109 | [-0.41,0.19]  | 0.4713  | -0.106 | [-0.40,0.19]  | 0.4846  | -0.124      | [-0.41,0.16]  | 0.3938  | -0.111 | [-0.40,0.17]  | 0.4435  | -0.115      | [-0.40,0.17]  | 0.4268  |
| Student                   | 0.400           | [0.13,0.67]   | 0.0035  | 0.435  | [0.17,0.70]   | 0.0015  | 0.444  | [0.17,0.71]   | 0.0012  | 0.402       | [0.08,0.72]   | 0.0132  | 0.437  | [0.12,0.76]   | 0.0070  | 0.443       | [0.13,0.76]   | 0.0063  |
| House Work                | -0.008          | [-0.14,0.12]  | 0.9087  | -0.020 | [-0.15,0.11]  | 0.7607  | -0.020 | [-0.15,0.11]  | 0.7577  | 0.022       | [-0.10,0.14]  | 0.7210  | 0.012  | [-0.11,0.13]  | 0.8374  | 0.012       | [-0.11,0.13]  | 0.8428  |
| Other Activity            | 0.511           | [0.22,0.80]   | 0.0005  | 0.511  | [0.22,0.80]   | 0.0005  | 0.512  | [0.22,0.80]   | 0.0005  | 0.535       | [0.25,0.82]   | 0.0002  | 0.537  | [0.26,0.82]   | 0.0002  | 0.536       | [0.26,0.82]   | 0.0002  |
| Social Programme          | 0.064           | [-0.07,0.20]  | 0.3500  | 0.035  | [-0.10,0.17]  | 0.6092  | 0.041  | [-0.09,0.18]  | 0.5471  | 0.093       | [-0.06,0.25]  | 0.2376  | 0.069  | [-0.08,0.22]  | 0.3695  | 0.081       | [-0.07,0.23]  | 0.2815  |
| Chronically Ill           | 1.216           | [1.07,1.36]   | 0.0000  | 1.217  | [1.07,1.36]   | 0.0000  | 1.215  | [1.07,1.36]   | 0.0000  | 1.196       | [1.05,1.34]   | 0.0000  | 1.198  | [1.05,1.34]   | 0.0000  | 1.194       | [1.05,1.34]   | 0.0000  |
| Victim of Violence        | 2.312           | [1.95,2.67]   | 0.0000  | 2.320  | [1.96,2.68]   | 0.0000  | 2.322  | [1.96,2.68]   | 0.0000  | 2.304       | [1.91,2.70]   | 0.0000  | 2.308  | [1.91,2.70]   | 0.0000  | 2.313       | [1.92,2.71]   | 0.0000  |
| Limitations in Activities | 1.082           | [0.95,1.21]   | 0.0000  | 1.079  | [0.95,1.21]   | 0.0000  | 1.075  | [0.95,1.21]   | 0.0000  | 1.087       | [0.92,1.26]   | 0.0000  | 1.082  | [0.91,1.25]   | 0.0000  | 1.079       | [0.91,1.25]   | 0.0000  |
| Drinks few times a year   | 0.159           | [0.05,0.26]   | 0.0030  | 0.168  | [0.06,0.27]   | 0.0017  | 0.169  | [0.06,0.27]   | 0.0016  | 0.172       | [0.03,0.31]   | 0.0144  | 0.179  | [0.04,0.32]   | 0.0120  | 0.178       | [0.04,0.32]   | 0.0123  |
| Drinks few times a month  | 0.158           | [0.04,0.28]   | 0.0117  | 0.173  | [0.05,0.30]   | 0.0058  | 0.178  | [0.05,0.30]   | 0.0046  | 0.172       | [0.03,0.31]   | 0.0155  | 0.185  | [0.04,0.33]   | 0.0098  | 0.190       | [0.05,0.33]   | 0.0086  |
| Drinks Weekly/Daily       | 0.354           | [0.20,0.51]   | 0.0000  | 0.377  | [0.22,0.53]   | 0.0000  | 0.379  | [0.23,0.53]   | 0.0000  | 0.418       | [0.24,0.60]   | 0.0000  | 0.438  | [0.26,0.62]   | 0.0000  | 0.442       | [0.26,0.62]   | 0.0000  |
| Has Health Insurance      | -0.035          | [-0.16,0.09]  | 0.5709  | -0.042 | [-0.16,0.08]  | 0.5084  | -0.045 | [-0.17,0.08]  | 0.4698  | -0.030      | [-0.17,0.11]  | 0.6812  | -0.036 | [-0.18,0.11]  | 0.6166  | -0.038      | [-0.18,0.10]  | 0.5957  |
| Hospitals/Pop             | -0.019          | [-0.05,0.02]  | 0.2895  | -0.019 | [-0.05,0.02]  | 0.2859  | -0.020 | [-0.05,0.01]  | 0.2612  | -0.126      | [-0.30,0.05]  | 0.1635  | -0.115 | [-0.29,0.06]  | 0.2026  | -0.119      | [-0.29,0.06]  | 0.1853  |
| Mean Wealth               | 0.013           | [-0.08,0.11]  | 0.7887  | 0.034  | [-0.06,0.13]  | 0.4901  | 0.032  | [-0.06,0.13]  | 0.5059  | -0.102      | [-0.46,0.25]  | 0.5754  | -0.066 | [-0.43,0.29]  | 0.7204  | -0.071      | [-0.43,0.29]  | 0.6975  |
| Constant                  | 0.506           | [-0.51,1.52]  | 0.3292  | 0.281  | [-0.75,1.31]  | 0.5936  | 0.567  | [-0.49,1.63]  | 0.2949  | 1.782       | [-2.23,5.80]  | 0.3845  | 1.438  | [-2.64,5.52]  | 0.4898  | 1.961       | [-2.14,6.06]  | 0.3489  |
| Obs                       | 44,324          |               |         | 44,324 |               |         | 44,324 |               |         | 44,324      |               |         | 44,324 |               |         | 44,324      |               |         |

For models 1-3 the second level is the municipality. For models 4-6 the second level is the state.

*ROBUSTNESS CHECK 6b – Multilevel models for depressive symptoms using sample weights and continuous measure of absolute wealth*

|                           | MUNICIPAL LEVEL |               |         |        |               |         |        |               |         | STATE LEVEL |               |         |        |               |         |             |               |         |
|---------------------------|-----------------|---------------|---------|--------|---------------|---------|--------|---------------|---------|-------------|---------------|---------|--------|---------------|---------|-------------|---------------|---------|
|                           | (1)             | (2)           | (3)     | (4)    | (5)           | (6)     |        |               |         |             |               |         |        |               |         |             |               |         |
|                           | Beta            | 95% CI        | P-Value | Beta   | 95% CI        | P-Value | Beta   | 95% CI        | P-Value | Beta        | 95% CI        | P-Value | Beta   | 95% CI        | P-Value | Beta        | 95% CI        | P-Value |
| Poorest Quartile          | 0.689           | [0.43,0.95]   | 0.0000  | 0.516  | [0.20,0.83]   | 0.0012  | 0.463  | [0.15,0.78]   | 0.0041  | 0.545       | [0.35,0.74]   | 0.0000  | 0.437  | [0.22,0.65]   | 0.0001  | 0.424       | [0.21,0.64]   | 0.0001  |
| 2 <sup>nd</sup> Quartile  | 0.654           | [0.48,0.83]   | 0.0000  | 0.522  | [0.31,0.74]   | 0.0000  | 0.443  | [0.22,0.67]   | 0.0001  | 0.611       | [0.46,0.76]   | 0.0000  | 0.509  | [0.34,0.68]   | 0.0000  | 0.448       | [0.28,0.62]   | 0.0000  |
| 3 <sup>rd</sup> Quartile  | 0.360           | [0.23,0.49]   | 0.0000  | 0.270  | [0.11,0.43]   | 0.0010  | 0.206  | [0.04,0.38]   | 0.0173  | 0.349       | [0.22,0.48]   | 0.0000  | 0.270  | [0.13,0.41]   | 0.0002  | 0.215       | [0.07,0.36]   | 0.0038  |
| Rel Deprivation           | 0.134           | [0.05,0.22]   | 0.0015  | 0.119  | [0.04,0.20]   | 0.0054  | 0.108  | [0.02,0.19]   | 0.0125  | 0.173       | [0.11,0.24]   | 0.0000  | 0.138  | [0.07,0.21]   | 0.0001  | 0.118       | [0.05,0.19]   | 0.0010  |
| Rel Affluence             |                 |               |         | -0.094 | [-0.19,-0.00] | 0.0500  | -0.315 | [-0.53,-0.10] | 0.0038  |             |               |         | -0.099 | [-0.18,-0.02] | 0.0156  | -0.500      | [-0.75,-0.25] | 0.0001  |
| Gini                      | -1.162          | [-3.64,1.32]  | 0.3585  | -0.571 | [-3.12,1.98]  | 0.6608  | -1.674 | [-4.40,1.05]  | 0.2279  | -2.909      | [-11.09,5.27] | 0.4858  | -2.257 | [-8.61,4.10]  | 0.4864  | -4.424      | [-9.11,0.27]  | 0.0645  |
| Rel Affluence*Gini        |                 |               |         |        |               |         | 1.296  | [0.17,2.42]   | 0.0239  |             |               |         |        |               | 2.390   | [0.98,3.80] | 0.0009        |         |
| N people in HH            | 0.038           | [0.01,0.06]   | 0.0023  | 0.039  | [0.01,0.06]   | 0.0019  | 0.040  | [0.01,0.06]   | 0.0017  | 0.031       | [0.01,0.06]   | 0.0130  | 0.034  | [0.01,0.06]   | 0.0074  | 0.037       | [0.01,0.06]   | 0.0038  |
| Female                    | 1.664           | [1.55,1.78]   | 0.0000  | 1.668  | [1.55,1.78]   | 0.0000  | 1.668  | [1.55,1.79]   | 0.0000  | 1.680       | [1.56,1.80]   | 0.0000  | 1.682  | [1.57,1.80]   | 0.0000  | 1.680       | [1.56,1.80]   | 0.0000  |
| Age                       | 0.113           | [0.10,0.13]   | 0.0000  | 0.113  | [0.10,0.13]   | 0.0000  | 0.113  | [0.10,0.13]   | 0.0000  | 0.114       | [0.10,0.13]   | 0.0000  | 0.114  | [0.10,0.13]   | 0.0000  | 0.113       | [0.10,0.13]   | 0.0000  |
| Age <sup>2</sup>          | -0.001          | [-0.00,-0.00] | 0.0000  | -0.001 | [-0.00,-0.00] | 0.0000  | -0.001 | [-0.00,-0.00] | 0.0000  | -0.001      | [-0.00,-0.00] | 0.0000  | -0.001 | [-0.00,-0.00] | 0.0000  | -0.001      | [-0.00,-0.00] | 0.0000  |
| Married                   | -0.397          | [-0.49,-0.30] | 0.0000  | -0.394 | [-0.49,-0.30] | 0.0000  | -0.392 | [-0.48,-0.30] | 0.0000  | -0.394      | [-0.49,-0.30] | 0.0000  | -0.385 | [-0.48,-0.29] | 0.0000  | -0.370      | [-0.46,-0.28] | 0.0000  |
| No education / Primary    | -0.385          | [-0.50,-0.27] | 0.0000  | -0.380 | [-0.49,-0.27] | 0.0000  | -0.382 | [-0.50,-0.27] | 0.0000  | -0.379      | [-0.49,-0.27] | 0.0000  | -0.380 | [-0.49,-0.27] | 0.0000  | -0.389      | [-0.50,-0.28] | 0.0000  |
| Secondary                 | -0.889          | [-1.02,-0.76] | 0.0000  | -0.871 | [-1.01,-0.74] | 0.0000  | -0.867 | [-1.00,-0.73] | 0.0000  | -0.902      | [-1.03,-0.77] | 0.0000  | -0.891 | [-1.02,-0.76] | 0.0000  | -0.903      | [-1.04,-0.77] | 0.0000  |
| Not Employed              | 0.580           | [0.36,0.80]   | 0.0000  | 0.581  | [0.36,0.80]   | 0.0000  | 0.580  | [0.36,0.80]   | 0.0000  | 0.630       | [0.41,0.85]   | 0.0000  | 0.633  | [0.41,0.85]   | 0.0000  | 0.635       | [0.42,0.86]   | 0.0000  |
| Retired                   | -0.116          | [-0.36,0.13]  | 0.3494  | -0.112 | [-0.36,0.13]  | 0.3673  | -0.111 | [-0.35,0.13]  | 0.3726  | -0.112      | [-0.36,0.13]  | 0.3683  | -0.114 | [-0.36,0.13]  | 0.3622  | -0.129      | [-0.37,0.12]  | 0.3007  |
| Student                   | 0.433           | [0.11,0.76]   | 0.0093  | 0.439  | [0.11,0.77]   | 0.0084  | 0.443  | [0.12,0.77]   | 0.0079  | 0.454       | [0.13,0.78]   | 0.0068  | 0.461  | [0.13,0.79]   | 0.0060  | 0.466       | [0.14,0.79]   | 0.0056  |
| House Work                | -0.033          | [-0.15,0.09]  | 0.5850  | -0.036 | [-0.15,0.08]  | 0.5586  | -0.035 | [-0.15,0.08]  | 0.5634  | -0.042      | [-0.16,0.08]  | 0.4948  | -0.043 | [-0.16,0.08]  | 0.4784  | -0.045      | [-0.16,0.07]  | 0.4593  |
| Other Activity            | 0.511           | [0.24,0.79]   | 0.0003  | 0.512  | [0.24,0.79]   | 0.0003  | 0.513  | [0.24,0.79]   | 0.0002  | 0.521       | [0.25,0.80]   | 0.0002  | 0.524  | [0.25,0.80]   | 0.0002  | 0.523       | [0.25,0.80]   | 0.0002  |
| Social Programme          | 0.007           | [-0.11,0.13]  | 0.9046  | 0.002  | [-0.12,0.12]  | 0.9733  | 0.005  | [-0.11,0.12]  | 0.9384  | 0.006       | [-0.11,0.12]  | 0.9158  | 0.008  | [-0.11,0.13]  | 0.8936  | 0.019       | [-0.10,0.14]  | 0.7474  |
| Chronically Ill           | 1.185           | [1.06,1.31]   | 0.0000  | 1.186  | [1.06,1.31]   | 0.0000  | 1.185  | [1.06,1.31]   | 0.0000  | 1.185       | [1.06,1.31]   | 0.0000  | 1.191  | [1.06,1.32]   | 0.0000  | 1.201       | [1.07,1.33]   | 0.0000  |
| Victim of Violence        | 2.385           | [2.09,2.68]   | 0.0000  | 2.388  | [2.10,2.68]   | 0.0000  | 2.388  | [2.10,2.68]   | 0.0000  | 2.434       | [2.14,2.73]   | 0.0000  | 2.440  | [2.15,2.73]   | 0.0000  | 2.457       | [2.16,2.75]   | 0.0000  |
| Limitations in Activities | 1.099           | [1.01,1.19]   | 0.0000  | 1.099  | [1.01,1.19]   | 0.0000  | 1.098  | [1.00,1.19]   | 0.0000  | 1.084       | [0.99,1.18]   | 0.0000  | 1.087  | [0.99,1.18]   | 0.0000  | 1.095       | [1.00,1.19]   | 0.0000  |
| Drinks few times a year   | 0.177           | [0.07,0.28]   | 0.0011  | 0.179  | [0.07,0.29]   | 0.0010  | 0.179  | [0.07,0.29]   | 0.0010  | 0.189       | [0.08,0.30]   | 0.0005  | 0.190  | [0.08,0.30]   | 0.0005  | 0.189       | [0.08,0.30]   | 0.0005  |
| Drinks few times a month  | 0.188           | [0.06,0.32]   | 0.0048  | 0.190  | [0.06,0.32]   | 0.0043  | 0.192  | [0.06,0.32]   | 0.0039  | 0.186       | [0.06,0.32]   | 0.0053  | 0.187  | [0.06,0.32]   | 0.0052  | 0.186       | [0.05,0.32]   | 0.0054  |
| Drinks Weekly/Daily       | 0.403           | [0.24,0.56]   | 0.0000  | 0.409  | [0.25,0.57]   | 0.0000  | 0.410  | [0.25,0.57]   | 0.0000  | 0.422       | [0.26,0.58]   | 0.0000  | 0.426  | [0.27,0.59]   | 0.0000  | 0.428       | [0.27,0.59]   | 0.0000  |
| Has Health Insurance      | -0.041          | [-0.15,0.07]  | 0.4519  | -0.042 | [-0.15,0.07]  | 0.4428  | -0.045 | [-0.15,0.06]  | 0.4161  | -0.027      | [-0.14,0.08]  | 0.6193  | -0.032 | [-0.14,0.08]  | 0.5631  | -0.040      | [-0.15,0.07]  | 0.4651  |
| Hospitals/Pop             | -0.018          | [-0.05,0.02]  | 0.3516  | -0.017 | [-0.05,0.02]  | 0.3622  | -0.018 | [-0.05,0.02]  | 0.3541  | -0.084      | [-0.21,0.05]  | 0.2041  | -0.079 | [-0.18,0.02]  | 0.1252  | -0.078      | [-0.15,-0.01] | 0.0314  |
| Mean Wealth               | 0.077           | [-0.02,0.17]  | 0.1210  | 0.069  | [-0.03,0.17]  | 0.1678  | 0.066  | [-0.03,0.16]  | 0.1814  | -0.021      | [-0.32,0.27]  | 0.8903  | -0.007 | [-0.24,0.22]  | 0.9529  | -0.005      | [-0.17,0.16]  | 0.9506  |
| Constant                  | -0.799          | [-1.80,0.20]  | 0.1181  | -0.652 | [-1.66,0.36]  | 0.2067  | -0.401 | [-1.44,0.63]  | 0.4468  | 0.205       | [-3.02,3.43]  | 0.9009  | 0.177  | [-2.33,2.69]  | 0.8898  | 0.593       | [-1.22,2.41]  | 0.5223  |
| Obs                       | 44,324          |               |         | 44,324 |               |         | 44,324 |               |         | 44,324      |               |         | 44,324 |               |         | 44,324      |               |         |
|                           | 0.0876          |               |         | 0.0877 |               |         | 0.0878 |               |         | 0.0881      |               |         | 0.0882 |               |         | 0.0885      |               |         |
|                           | 0.0952          |               |         | 0.0953 |               |         | 0.0963 |               |         | 0.3300      |               |         | 0.3337 |               |         | 0.3550      |               |         |
|                           | 0.0864          |               |         | 0.0865 |               |         | 0.0866 |               |         | 0.0867      |               |         | 0.0868 |               |         | 0.0870      |               |         |

For models 1-3 the second level is the municipality. For models 4-6 the second level is the state.

*ROBUSTNESS CHECK 6c – Multilevel models for depressive symptoms using Gini coefficients calculated taking sample weights into account*
